# Supplementary material for: Physical mapping of QTL for tuber yield, starch content and starch yield in tetraploid potato (Solanum tuberosum L.) by means of genome wide genotyping by sequencing and the 8.3 K SolCAP SNP array
Source: BMC Genomics. 2017 Aug 22;18:642. doi: 10.1186/s12864-017-3979-9 (PMC5567664; doi:10.1186/s12864-017-3979-9)
Supplement: Supplementary file 6 — Alleles and allele counts of RADseq SNPs with differential allele frequencies (FDR < 0.05) in two case-control populations: TSC and TY, TSC and TSY or TY and TSY. Trait TSC is highlighted blue, TY orange and TSY green. (XLSX 1349 kb) [file 12864_2017_3979_MOESM6_ESM.xlsx]

## Sheet: Tabelle2
Chromosome	SNP position (v2.1.11)	Trait	Reference allele (DM_phu)	Alternative allele (tbr)	Amino acid changes	phu_SNP count HIGH	tbr_SNP count HIGH	phu_SNP count LOW	tbr_snp count LOW	p-value	FDR	Locus (loci highlighted green contain SNPs with FDR < 0.0001 and causing amino acid changes)	Locus position (v4.03)	Annotation	Double annotation	Peak No. (Additionalf File 5)	QTL region No. (Figures 2 and 3)
chr01	391834	TSC	T	A		1	19	5	3	0.00304719	0.03495	PGSC0003DMG400022786	00250800..265700	Plasmalemma Na+/H+ antiporter		1
chr01	392416	TSC	T	A		82	37	57	57	0.00347335	0.03826	PGSC0003DMG400022786	00250800..265700	Plasmalemma Na+/H+ antiporter		1
chr01	392416	TY	T	A		53	49	121	48	0.00162157	0.02776	PGSC0003DMG400022786	00250800..265700	Plasmalemma Na+/H+ antiporter		1
chr01	392433	TSC	C	T		45	88	23	104	0.00467643	0.04721	PGSC0003DMG400022786	00250800..265700	Plasmalemma Na+/H+ antiporter		1
chr01	392477	TSC	A	G		54	109	22	127	0.000195205	0.00482	PGSC0003DMG400022786	00250800..265700	Plasmalemma Na+/H+ antiporter		1
chr01	392477	TY	A	G		38	90	106	117	0.00109412	0.02115	PGSC0003DMG400022786	00250800..265700	Plasmalemma Na+/H+ antiporter		1
chr01	396503	TSC	G	C		77	40	38	47	0.0038949	0.04149	PGSC0003DMG400022786	00250800..265700	Plasmalemma Na+/H+ antiporter		1
chr01	396527	TSC	T	A		5	242	20	178	0.000278722	0.00628	PGSC0003DMG400022786	00250800..265700	Plasmalemma Na+/H+ antiporter		1
chr01	396527	TSY	T	A		5	180	37	182	1.93737e-06	0.00056	PGSC0003DMG400022786	00250800..265700	Plasmalemma Na+/H+ antiporter		1
chr01	396674	TSC	T	A		2	173	10	109	0.00430436	0.04451	PGSC0003DMG400022786	00250800..265700	Plasmalemma Na+/H+ antiporter		1
chr01	396683	TSC	A	G		100	24	51	45	1.80251e-05	0.00083	PGSC0003DMG400022786	00250800..265700	Plasmalemma Na+/H+ antiporter		1
chr01	377637	TSC	G	A		82	25	51	45	0.000624628	0.01127	PGSC0003DMG400022767	00276810..280160	Transmembrane transporter		1
chr01	377712	TSY	G	A		153	7	190	38	0.000158599	0.01094	PGSC0003DMG400022767	00276810..280160	Transmembrane transporter		1
chr01	377715	TSC	G	A		94	156	40	165	3.21625e-05	0.00128	PGSC0003DMG400022767	00276810..280160	Transmembrane transporter		1
chr01	377715	TY	G	A		39	166	111	139	8.39577e-09	0	PGSC0003DMG400022767	00276810..280160	Transmembrane transporter		1
chr01	377715	TSY	G	A		46	120	118	114	4.93106e-06	0.00107	PGSC0003DMG400022767	00276810..280160	Transmembrane transporter		1
chr01	377770	TSC	C	T	R/H	157	57	93	75	0.000331485	0.00712	PGSC0003DMG400022767	00276810..280160	Transmembrane transporter		1
chr01	377770	TY	C	T	R/H	77	88	162	59	1.08858e-07	3e-05	PGSC0003DMG400022767	00276810..280160	Transmembrane transporter		1
chr01	377770	TSY	C	T	R/H	73	61	137	51	0.00085684	0.03251	PGSC0003DMG400022767	00276810..280160	Transmembrane transporter		1
chr01	377886	TSC	C	G		45	83	14	84	0.000410342	0.00832	PGSC0003DMG400022767	00276810..280160	Transmembrane transporter		1
chr01	377886	TY	C	G		26	71	62	72	0.00381707	0.04955	PGSC0003DMG400022767	00276810..280160	Transmembrane transporter		1
chr01	332859	TY	A	G		124	9	137	50	3.65054e-06	0.00035	PGSC0003DMG400022789	00322990..326090	Type I inositol polyphosphate 5-phosphatase		1
chr01	332883	TSC	C	T		134	54	78	63	0.00356173	0.03897	PGSC0003DMG400022789	00322990..326090	Type I inositol polyphosphate 5-phosphatase		1
chr01	315273	TSC	A	G		0	170	10	131	0.000306373	0.00673	PGSC0003DMG400022790	00340900..348700	Oxidoreductase		1
chr01	315307	TY	C	A		16	140	79	167	2.81174e-07	5e-05	PGSC0003DMG400022790	00340900..348700	Oxidoreductase		1
chr01	315344	TY	T	A		48	13	110	5	0.000993558	0.01981	PGSC0003DMG400022790	00340900..348700	Oxidoreductase		1
chr01	315357	TY	T	G		53	14	109	6	0.00231092	0.03531	PGSC0003DMG400022790	00340900..348700	Oxidoreductase		1
chr01	304367	TY	T	A		16	37	55	35	0.000491091	0.01216	PGSC0003DMG400022770	00348780..352780	Dolichol-phosphate mannosyltransferase		1
chr01	304367	TSY	T	A		21	38	48	24	0.000458032	0.02185	PGSC0003DMG400022770	00348780..352780	Dolichol-phosphate mannosyltransferase		1
chr01	304406	TY	A	G		32	82	108	83	1.69535e-06	0.0002	PGSC0003DMG400022770	00348780..352780	Dolichol-phosphate mannosyltransferase		1
chr01	304406	TSY	A	G		45	70	96	55	0.000112557	0.00875	PGSC0003DMG400022770	00348780..352780	Dolichol-phosphate mannosyltransferase		1
chr01	304462	TY	T	C		25	72	77	64	1.01162e-05	0.00074	PGSC0003DMG400022770	00348780..352780	Dolichol-phosphate mannosyltransferase		1
chr01	304462	TSY	T	C		30	60	68	46	0.000233672	0.01408	PGSC0003DMG400022770	00348780..352780	Dolichol-phosphate mannosyltransferase		1
chr01	304537	TY	T	G		59	104	120	84	1.67556e-05	0.00109	PGSC0003DMG400022770	00348780..352780	Dolichol-phosphate mannosyltransferase		1
chr01	304537	TSY	T	G		44	82	106	62	2.13727e-06	0.0006	PGSC0003DMG400022770	00348780..352780	Dolichol-phosphate mannosyltransferase		1
chr01	304539	TY	T	A		59	104	129	78	7.55418e-07	0.00011	PGSC0003DMG400022770	00348780..352780	Dolichol-phosphate mannosyltransferase		1
chr01	304539	TSY	T	A		50	76	115	55	2.0024e-06	0.00057	PGSC0003DMG400022770	00348780..352780	Dolichol-phosphate mannosyltransferase		1
chr01	304554	TY	T	C		60	106	133	81	6.06899e-07	9e-05	PGSC0003DMG400022770	00348780..352780	Dolichol-phosphate mannosyltransferase		1
chr01	304554	TSY	T	C		53	80	117	58	3.26287e-06	0.0008	PGSC0003DMG400022770	00348780..352780	Dolichol-phosphate mannosyltransferase		1
chr01	304563	TY	A	G		62	89	118	81	0.000818747	0.0173	PGSC0003DMG400022770	00348780..352780	Dolichol-phosphate mannosyltransferase		1
chr01	304563	TSY	A	G		49	72	105	59	0.000112031	0.00872	PGSC0003DMG400022770	00348780..352780	Dolichol-phosphate mannosyltransferase		1
chr01	304611	TY	G	C		25	52	57	38	0.000402771	0.01058	PGSC0003DMG400022770	00348780..352780	Dolichol-phosphate mannosyltransferase		1
chr01	304612	TY	G	C		26	52	57	39	0.000774134	0.01667	PGSC0003DMG400022770	00348780..352780	Dolichol-phosphate mannosyltransferase		1
chr01	542869	TSC	A	C		57	27	39	48	0.00331661	0.03707	PGSC0003DMG400032120	01036600..1043600	Isoform 2 of UPF0496 protein		2
chr01	542909	TSC	T	A		27	131	1	144	1.19218e-07	2e-05	PGSC0003DMG400032120	01036600..1043600	Isoform 2 of UPF0496 protein		2
chr01	542909	TY	T	A		0	144	16	179	0.00012643	0.00466	PGSC0003DMG400032120	01036600..1043600	Isoform 2 of UPF0496 protein		2
chr01	542931	TSC	A	C		24	137	4	135	0.000263257	0.00602	PGSC0003DMG400032120	01036600..1043600	Isoform 2 of UPF0496 protein		2
chr01	542931	TY	A	C		1	144	15	175	0.00148504	0.02614	PGSC0003DMG400032120	01036600..1043600	Isoform 2 of UPF0496 protein		2
chr01	542942	TY	A	G		160	5	181	46	1.07428e-07	3e-05	PGSC0003DMG400032120	01036600..1043600	Isoform 2 of UPF0496 protein		2
chr01	542942	TSY	A	G		132	14	145	46	0.000526497	0.02385	PGSC0003DMG400032120	01036600..1043600	Isoform 2 of UPF0496 protein		2
chr01	542983	TY	T	C		121	110	156	78	0.00183725	0.03022	PGSC0003DMG400032120	01036600..1043600	Isoform 2 of UPF0496 protein		2
chr01	542983	TSY	T	C		122	100	166	67	0.000325887	0.0175	PGSC0003DMG400032120	01036600..1043600	Isoform 2 of UPF0496 protein		2
chr01	543005	TSC	A	G		38	176	8	210	1.42228e-06	0.00012	PGSC0003DMG400032120	01036600..1043600	Isoform 2 of UPF0496 protein		2
chr01	543005	TY	A	G		3	214	22	196	0.00010271	0.00402	PGSC0003DMG400032120	01036600..1043600	Isoform 2 of UPF0496 protein		2
chr01	544389	TY	G	A		1	188	22	200	1.30334e-05	0.0009	PGSC0003DMG400032120	01036600..1043600	Isoform 2 of UPF0496 protein		2
chr01	544473	TY	C	T		0	107	18	94	3.90735e-06	0.00037	PGSC0003DMG400032120	01036600..1043600	Isoform 2 of UPF0496 protein		2
chr01	550603	TY	T	A		14	20	35	10	0.00115451	0.02198	PGSC0003DMG402032161	01041000..1048800	Iaa-amino acid hydrolase 4	PGSC0003DMG401032161	2
chr01	550603	TSY	T	A		14	25	27	7	0.000320595	0.01732	PGSC0003DMG402032161	01041000..1048800	Iaa-amino acid hydrolase 4	PGSC0003DMG401032161	2
chr01	550662	TY	C	T		41	53	90	35	2.77295e-05	0.00157	PGSC0003DMG402032161	01041000..1048800	Iaa-amino acid hydrolase 4	PGSC0003DMG401032161	2
chr01	550662	TSY	C	T		34	53	70	32	6.74998e-05	0.00627	PGSC0003DMG402032161	01041000..1048800	Iaa-amino acid hydrolase 4	PGSC0003DMG401032161	2
chr01	550821	TSC	C	A		124	49	94	78	0.00120007	0.018	PGSC0003DMG402032161	01041000..1048800	Iaa-amino acid hydrolase 4	PGSC0003DMG401032161	2
chr01	550821	TY	C	A		71	86	140	56	7.75696e-07	0.00011	PGSC0003DMG402032161	01041000..1048800	Iaa-amino acid hydrolase 4	PGSC0003DMG401032161	2
chr01	550821	TSY	C	A		61	70	122	50	1.96181e-05	0.00273	PGSC0003DMG402032161	01041000..1048800	Iaa-amino acid hydrolase 4	PGSC0003DMG401032161	2
chr01	550844	TSC	A	C		18	177	3	198	0.000538025	0.01011	PGSC0003DMG402032161	01041000..1048800	Iaa-amino acid hydrolase 4	PGSC0003DMG401032161	2
chr01	550844	TY	A	C		0	184	16	219	0.000106367	0.00412	PGSC0003DMG402032161	01041000..1048800	Iaa-amino acid hydrolase 4	PGSC0003DMG401032161	2
chr01	550915	TSC	T	G		90	30	56	47	0.0017998	0.02411	PGSC0003DMG402032161	01041000..1048800	Iaa-amino acid hydrolase 4	PGSC0003DMG401032161	2
chr01	550915	TY	T	G		51	45	142	30	4.80312e-07	8e-05	PGSC0003DMG402032161	01041000..1048800	Iaa-amino acid hydrolase 4	PGSC0003DMG401032161	2
chr01	550915	TSY	T	G		48	34	121	32	0.00128786	0.04204	PGSC0003DMG402032161	01041000..1048800	Iaa-amino acid hydrolase 4	PGSC0003DMG401032161	2
chr01	560734	TSC	C	T		16	45	1	31	0.004968	0.04924	PGSC0003DMG400032164	01056710..1058070	Short chain alcohol dehydrogenase		2
chr01	560824	TSC	A	T	N/K	16	102	1	90	0.000668843	0.01183	PGSC0003DMG400032164	01056710..1058070	Short chain alcohol dehydrogenase		2
chr01	560824	TY	A	T	N/K	0	95	15	131	0.000554649	0.01324	PGSC0003DMG400032164	01056710..1058070	Short chain alcohol dehydrogenase		2
chr01	560839	TY	A	G		84	72	186	64	2.42929e-05	0.00143	PGSC0003DMG400032164	01056710..1058070	Short chain alcohol dehydrogenase		2
chr01	560839	TSY	A	G		73	53	168	54	0.000707673	0.02884	PGSC0003DMG400032164	01056710..1058070	Short chain alcohol dehydrogenase		2
chr01	560903	TY	T	C	K/R	48	105	105	114	0.00185514	0.03043	PGSC0003DMG400032164	01056710..1058070	Short chain alcohol dehydrogenase		2
chr01	560903	TSY	T	C	K/R	34	81	100	92	0.000135181	0.00986	PGSC0003DMG400032164	01056710..1058070	Short chain alcohol dehydrogenase		2
chr01	560929	TSC	A	G		95	95	40	102	7.30132e-05	0.00234	PGSC0003DMG400032164	01056710..1058070	Short chain alcohol dehydrogenase		2
chr01	560938	TSC	G	A		172	24	101	44	5.68431e-05	0.00195	PGSC0003DMG400032164	01056710..1058070	Short chain alcohol dehydrogenase		2
chr01	560962	TSC	T	C		142	97	49	124	3.99134e-10	0	PGSC0003DMG400032164	01056710..1058070	Short chain alcohol dehydrogenase		2
chr01	561009	TY	A	T	S/T	4	82	34	96	3.61509e-05	0.00191	PGSC0003DMG400032164	01056710..1058070	Short chain alcohol dehydrogenase		2
chr01	561040	TSC	G	A		42	77	10	73	0.000162977	0.00423	PGSC0003DMG400032164	01056710..1058070	Short chain alcohol dehydrogenase		2
chr01	561040	TY	G	A		5	81	42	105	1.52649e-05	0.00102	PGSC0003DMG400032164	01056710..1058070	Short chain alcohol dehydrogenase		2
chr01	561076	TSC	C	G		72	8	39	18	0.00194581	0.02549	PGSC0003DMG400032164	01056710..1058070	Short chain alcohol dehydrogenase		2
chr01	561080	TSC	G	A	A/V	22	49	5	48	0.00422288	0.0439	PGSC0003DMG400032164	01056710..1058070	Short chain alcohol dehydrogenase		2
chr01	561080	TY	G	A	A/V	4	46	29	72	0.00329937	0.04493	PGSC0003DMG400032164	01056710..1058070	Short chain alcohol dehydrogenase		2
chr01	568251	TSC	A	G		35	215	0	249	1.61942e-11	0	PGSC0003DMG400032210	01062930..1065070	Ntp201		2
chr01	568251	TY	A	G		3	238	22	228	0.000114947	0.00436	PGSC0003DMG400032210	01062930..1065070	Ntp201		2
chr01	568258	TSC	C	T		39	211	1	248	1.61473e-11	0	PGSC0003DMG400032210	01062930..1065070	Ntp201		2
chr01	568258	TY	C	T		4	245	25	225	6.59909e-05	0.00294	PGSC0003DMG400032210	01062930..1065070	Ntp201		2
chr01	621359	TSC	T	C		36	156	10	151	0.000433345	0.00866	PGSC0003DMG400032124	01114300..1120400	Isocitrate dehydrogenase [NADP]		2
chr01	621359	TY	T	C		5	164	21	168	0.00361517	0.04775	PGSC0003DMG400032124	01114300..1120400	Isocitrate dehydrogenase [NADP]		2
chr01	621369	TSC	T	C		199	3	132	33	9.25294e-10	0	PGSC0003DMG400032124	01114300..1120400	Isocitrate dehydrogenase [NADP]		2
chr01	621517	TSY	G	A		23	16	50	7	0.00161206	0.04834	PGSC0003DMG400032124	01114300..1120400	Isocitrate dehydrogenase [NADP]		2
chr01	660391	TSC	G	A		56	9	25	18	0.00141958	0.02031	PGSC0003DMG400032169	01154020..1158720	Oxoglutarate malate translocator		2
chr01	660417	TSC	G	A		60	5	23	12	0.00148392	0.02097	PGSC0003DMG400032169	01154020..1158720	Oxoglutarate malate translocator		2
chr01	660589	TY	A	C		46	70	124	61	4.85477e-06	0.00043	PGSC0003DMG400032169	01154020..1158720	Oxoglutarate malate translocator		2
chr01	660639	TSC	A	G		55	30	21	39	0.000676238	0.01193	PGSC0003DMG400032169	01154020..1158720	Oxoglutarate malate translocator		2
chr01	660639	TY	A	G		26	38	65	33	0.00197948	0.03178	PGSC0003DMG400032169	01154020..1158720	Oxoglutarate malate translocator		2
chr01	660660	TSC	G	C		46	22	18	30	0.00225969	0.02835	PGSC0003DMG400032169	01154020..1158720	Oxoglutarate malate translocator		2
chr01	660661	TSC	T	A		43	22	18	30	0.0039887	0.04219	PGSC0003DMG400032169	01154020..1158720	Oxoglutarate malate translocator		2
chr01	805347	TSC	A	T		72	70	41	96	0.000607814	0.01105	PGSC0003DMG400032128	01301090..1303590	Conserved gene of unknown function		2
chr01	805392	TSC	A	G		18	85	3	88	0.00195772	0.02561	PGSC0003DMG400032128	01301090..1303590	Conserved gene of unknown function		2
chr01	805415	TSC	G	T		21	118	1	121	1.80292e-05	0.00083	PGSC0003DMG400032128	01301090..1303590	Conserved gene of unknown function		2
chr01	805415	TY	G	T		1	123	20	136	5.57843e-05	0.00261	PGSC0003DMG400032128	01301090..1303590	Conserved gene of unknown function		2
chr01	805477	TSC	A	C		81	83	38	97	0.000224216	0.00535	PGSC0003DMG400032128	01301090..1303590	Conserved gene of unknown function		2
chr01	805558	TSC	A	G		11	74	0	58	0.00301081	0.03466	PGSC0003DMG400032128	01301090..1303590	Conserved gene of unknown function		2
chr01	876968	TSC	A	G		24	203	4	184	0.000594106	0.01087	PGSC0003DMG400032177	01372680..1377080	Pentatricopeptide repeat-containing protein		2
chr01	876968	TY	A	G		2	204	22	199	2.84185e-05	0.0016	PGSC0003DMG400032177	01372680..1377080	Pentatricopeptide repeat-containing protein		2
chr01	876969	TSC	T	C		18	208	1	187	0.000187557	0.00469	PGSC0003DMG400032177	01372680..1377080	Pentatricopeptide repeat-containing protein		2
chr01	876988	TSC	G	C		17	125	0	121	1.85879e-05	0.00085	PGSC0003DMG400032177	01372680..1377080	Pentatricopeptide repeat-containing protein		2
chr01	876988	TY	G	C		0	123	11	123	0.000867556	0.01803	PGSC0003DMG400032177	01372680..1377080	Pentatricopeptide repeat-containing protein		2
chr01	877069	TSC	A	C		14	73	0	71	0.000279482	0.0063	PGSC0003DMG400032177	01372680..1377080	Pentatricopeptide repeat-containing protein		2
chr01	905311	TSC	G	A		12	23	0	27	0.000605588	0.01102	PGSC0003DMG400032131	01399690..1404130	Maintenance of killer 16 (Mak16) protein		2
chr01	905358	TSC	A	G		55	9	41	27	0.00154435	0.02159	PGSC0003DMG400032131	01399690..1404130	Maintenance of killer 16 (Mak16) protein		2
chr01	905423	TSC	T	C		33	164	0	177	3.16601e-10	0	PGSC0003DMG400032131	01399690..1404130	Maintenance of killer 16 (Mak16) protein		2
chr01	905423	TY	T	C		0	176	17	199	4.84151e-05	0.00236	PGSC0003DMG400032131	01399690..1404130	Maintenance of killer 16 (Mak16) protein		2
chr01	905557	TSC	C	A		215	21	174	50	8.84463e-05	0.00269	PGSC0003DMG400032131	01399690..1404130	Maintenance of killer 16 (Mak16) protein		2
chr01	905631	TSC	T	C		195	9	168	28	0.000837091	0.01392	PGSC0003DMG400032131	01399690..1404130	Maintenance of killer 16 (Mak16) protein		2
chr01	905734	TY	C	T		59	19	89	7	0.00236904	0.0359	PGSC0003DMG400032131	01399690..1404130	Maintenance of killer 16 (Mak16) protein		2
chr01	912251	TY	G	A		41	12	85	3	0.000534633	0.0129	PGSC0003DMG400032132	01405000..1411500	Serine/arginine-rich protein		2
chr01	912251	TSY	G	A		31	10	74	2	0.000449257	0.02158	PGSC0003DMG400032132	01405000..1411500	Serine/arginine-rich protein		2
chr01	912301	TSC	G	A		105	10	70	22	0.00343242	0.03796	PGSC0003DMG400032132	01405000..1411500	Serine/arginine-rich protein		2
chr01	912361	TSY	C	T		117	14	197	4	0.000896829	0.03345	PGSC0003DMG400032132	01405000..1411500	Serine/arginine-rich protein		2
chr01	912464	TSC	T	C		25	225	0	250	3.17071e-08	1e-05	PGSC0003DMG400032132	01405000..1411500	Serine/arginine-rich protein		2
chr01	912464	TY	T	C		0	249	20	230	1.28426e-06	0.00016	PGSC0003DMG400032132	01405000..1411500	Serine/arginine-rich protein		2
chr01	912595	TSC	G	A		143	18	94	30	0.00412138	0.04317	PGSC0003DMG400032132	01405000..1411500	Serine/arginine-rich protein		2
chr01	912617	TSC	A	G		61	149	14	162	1.32304e-07	2e-05	PGSC0003DMG400032132	01405000..1411500	Serine/arginine-rich protein		2
chr01	912617	TY	A	G		12	155	50	198	0.000226816	0.00707	PGSC0003DMG400032132	01405000..1411500	Serine/arginine-rich protein		2
chr01	960794	TSY	A	T		77	10	74	53	1.45458e-06	0.00046	PGSC0003DMG400032135	01454410..1459170	Uncharacterized BCR, COG1963 family protein		2
chr01	960883	TSY	C	T		48	7	50	34	0.000527242	0.02387	PGSC0003DMG400032135	01454410..1459170	Uncharacterized BCR, COG1963 family protein		2
chr01	960915	TSY	G	A		52	7	56	40	6.68072e-05	0.00622	PGSC0003DMG400032135	01454410..1459170	Uncharacterized BCR, COG1963 family protein		2
chr01	960947	TSY	T	G		36	5	31	28	0.0002137	0.01328	PGSC0003DMG400032135	01454410..1459170	Uncharacterized BCR, COG1963 family protein		2
chr01	983624	TY	T	A		11	13	0	14	0.00255383	0.03779	PGSC0003DMG400032180	01477400..1485000	Serine/threonine-protein phosphatase		2
chr01	983705	TSC	C	T		57	9	33	22	0.00148248	0.02096	PGSC0003DMG400032180	01477400..1485000	Serine/threonine-protein phosphatase		2
chr01	983736	TSC	T	A		103	16	61	45	1.1096e-06	0.0001	PGSC0003DMG400032180	01477400..1485000	Serine/threonine-protein phosphatase		2
chr01	1243618	TSC	G	C		115	3	55	11	0.000917533	0.01486	PGSC0003DMG400032145	01737320..1740860	Lipoate-protein ligase B
chr01	1243675	TSC	G	T		148	59	124	12	5.79356e-06	0.00035	PGSC0003DMG400032145	01737320..1740860	Lipoate-protein ligase B
chr01	1243675	TY	G	T		132	18	182	68	0.00026331	0.00785	PGSC0003DMG400032145	01737320..1740860	Lipoate-protein ligase B
chr01	1243675	TSY	G	T		114	13	149	48	0.00133393	0.043	PGSC0003DMG400032145	01737320..1740860	Lipoate-protein ligase B
chr01	1243712	TSC	T	C		189	24	108	32	0.00452918	0.04617	PGSC0003DMG400032145	01737320..1740860	Lipoate-protein ligase B
chr01	1243712	TY	T	C		111	37	203	28	0.00194312	0.03137	PGSC0003DMG400032145	01737320..1740860	Lipoate-protein ligase B
chr01	1243813	TSC	G	A		213	34	135	51	0.000570651	0.01056	PGSC0003DMG400032145	01737320..1740860	Lipoate-protein ligase B
chr01	1243829	TY	G	T		55	117	136	114	6.875e-06	0.00056	PGSC0003DMG400032145	01737320..1740860	Lipoate-protein ligase B
chr01	1243831	TY	T	A		51	120	133	114	1.34166e-06	0.00017	PGSC0003DMG400032145	01737320..1740860	Lipoate-protein ligase B
chr01	1243835	TSC	C	G		198	28	108	47	2.23082e-05	0.00097	PGSC0003DMG400032145	01737320..1740860	Lipoate-protein ligase B
chr01	1243836	TSC	C	T		183	38	140	11	0.00505593	0.04984	PGSC0003DMG400032145	01737320..1740860	Lipoate-protein ligase B
chr01	1243842	TSC	C	T		123	18	68	27	0.00382083	0.04095	PGSC0003DMG400032145	01737320..1740860	Lipoate-protein ligase B
chr01	1243859	TSC	A	G		101	38	87	11	0.00312212	0.03554	PGSC0003DMG400032145	01737320..1740860	Lipoate-protein ligase B
chr01	1243859	TY	A	G		111	14	111	45	0.000352477	0.00964	PGSC0003DMG400032145	01737320..1740860	Lipoate-protein ligase B
chr01	1512193	TSC	G	A		223	26	183	45	0.00465681	0.04708	PGSC0003DMG400032204	02007400..2013300	D12 oleate desaturase
chr01	1512193	TY	G	A		230	16	211	39	0.00149598	0.02626	PGSC0003DMG400032204	02007400..2013300	D12 oleate desaturase
chr01	1512205	TY	C	T		237	10	200	48	8.90785e-08	2e-05	PGSC0003DMG400032204	02007400..2013300	D12 oleate desaturase
chr01	1512250	TY	T	A		138	78	96	116	0.000146656	0.00519	PGSC0003DMG400032204	02007400..2013300	D12 oleate desaturase
chr01	1512250	TSY	T	A		149	67	101	113	6.33158e-06	0.00126	PGSC0003DMG400032204	02007400..2013300	D12 oleate desaturase
chr01	1512253	TY	A	G		125	85	160	50	0.000363039	0.00984	PGSC0003DMG400032204	02007400..2013300	D12 oleate desaturase
chr01	2142755	TSC	A	G		31	4	5	10	0.000177476	0.0045	PGSC0003DMG400021373	02636800..2643400	Zinc finger, RING-type		3
chr01	2142813	TSY	T	C		44	4	22	15	0.00055134	0.02456	PGSC0003DMG400021373	02636800..2643400	Zinc finger, RING-type		3
chr01	2142819	TSC	T	G		56	6	21	20	1.45944e-05	0.0007	PGSC0003DMG400021373	02636800..2643400	Zinc finger, RING-type		3
chr01	2142819	TY	T	G		26	28	45	7	2.87452e-05	0.00161	PGSC0003DMG400021373	02636800..2643400	Zinc finger, RING-type		3
chr01	2142826	TSC	T	C		51	7	23	19	0.000386874	0.00796	PGSC0003DMG400021373	02636800..2643400	Zinc finger, RING-type		3
chr01	2142826	TY	T	C		24	28	39	6	3.67287e-05	0.00193	PGSC0003DMG400021373	02636800..2643400	Zinc finger, RING-type		3
chr01	2142849	TSC	C	A		43	4	17	16	6.73092e-05	0.00221	PGSC0003DMG400021373	02636800..2643400	Zinc finger, RING-type		3
chr01	2142851	TSC	C	T		43	4	17	15	0.000133803	0.00367	PGSC0003DMG400021373	02636800..2643400	Zinc finger, RING-type		3
chr01	2196408	TSY	C	T		63	25	70	70	0.00148513	0.04606	PGSC0003DMG400021337	02688600..2693900	Co-chaperone protein HscB, mitochondrial		3
chr01	2196412	TY	T	C		76	33	87	83	0.0027426	0.03969	PGSC0003DMG400021337	02688600..2693900	Co-chaperone protein HscB, mitochondrial		3
chr01	2196412	TSY	T	C		62	25	70	71	0.00148704	0.04609	PGSC0003DMG400021337	02688600..2693900	Co-chaperone protein HscB, mitochondrial		3
chr01	2196458	TSC	G	A		11	181	0	187	0.000849654	0.01406	PGSC0003DMG400021337	02688600..2693900	Co-chaperone protein HscB, mitochondrial		3
chr01	2196476	TY	A	C		132	49	97	108	3.26887e-07	6e-05	PGSC0003DMG400021337	02688600..2693900	Co-chaperone protein HscB, mitochondrial		3
chr01	2196476	TSY	A	C		103	42	84	103	2.4517e-06	0.00066	PGSC0003DMG400021337	02688600..2693900	Co-chaperone protein HscB, mitochondrial		3
chr01	2243396	TSC	A	C		78	44	91	12	2.32927e-05	0.001	PGSC0003DMG400021370	02738550..2741530	Gene of unknown function		3
chr01	2243409	TY	T	C		87	19	193	11	0.000864615	0.01799	PGSC0003DMG400021370	02738550..2741530	Gene of unknown function		3
chr01	2243495	TSC	T	G		149	35	105	55	0.00138576	0.01997	PGSC0003DMG400021370	02738550..2741530	Gene of unknown function		3
chr01	2243514	TSC	G	A		113	94	71	108	0.0041858	0.04364	PGSC0003DMG400021370	02738550..2741530	Gene of unknown function		3
chr01	2243522	TSC	A	T		202	15	150	39	5.86436e-05	0.00199	PGSC0003DMG400021370	02738550..2741530	Gene of unknown function		3
chr01	2243522	TY	A	T		147	49	206	30	0.0011334	0.02168	PGSC0003DMG400021370	02738550..2741530	Gene of unknown function		3
chr01	2243535	TSC	G	T		229	8	176	34	2.89371e-06	0.00021	PGSC0003DMG400021370	02738550..2741530	Gene of unknown function		3
chr01	2243535	TY	G	T		182	30	238	12	0.000564246	0.01339	PGSC0003DMG400021370	02738550..2741530	Gene of unknown function		3
chr01	2243590	TSC	C	T		129	6	92	17	0.00378385	0.04068	PGSC0003DMG400021370	02738550..2741530	Gene of unknown function		3
chr01	2263919	TY	A	G		27	18	106	12	5.28259e-05	0.00251	PGSC0003DMG401021334	02760400..2766100	ML domain protein		3
chr01	2263919	TSY	A	G		31	14	94	8	0.000684671	0.02822	PGSC0003DMG401021334	02760400..2766100	ML domain protein		3
chr01	2263939	TY	T	G		12	25	69	33	0.00037024	0.00998	PGSC0003DMG401021334	02760400..2766100	ML domain protein		3
chr01	2263939	TSY	T	G		8	29	64	24	2.74311e-07	0.00014	PGSC0003DMG401021334	02760400..2766100	ML domain protein		3
chr01	2263962	TY	C	T		4	28	38	46	0.00102912	0.02027	PGSC0003DMG401021334	02760400..2766100	ML domain protein		3
chr01	2263962	TSY	C	T		3	30	34	38	0.000130074	0.00962	PGSC0003DMG401021334	02760400..2766100	ML domain protein		3
chr01	2264054	TY	T	C		4	94	42	176	0.000221561	0.00695	PGSC0003DMG401021334	02760400..2766100	ML domain protein		3
chr01	2264054	TSY	T	C		5	90	41	144	0.000155523	0.0108	PGSC0003DMG401021334	02760400..2766100	ML domain protein		3
chr01	2305352	TY	C	T		0	13	15	11	0.000355055	0.00969	PGSC0003DMG400021365	02798850..2803550	YA1		3
chr01	2305519	TSY	A	G		28	72	64	53	0.000104067	0.00834	PGSC0003DMG400021365	02798850..2803550	YA1		3
chr01	2305561	TSY	T	C		23	55	47	39	0.00151893	0.04671	PGSC0003DMG400021365	02798850..2803550	YA1		3
chr01	2305576	TSC	C	T		26	89	5	72	0.0026168	0.03146	PGSC0003DMG400021365	02798850..2803550	YA1		3
chr01	2305576	TY	C	T		2	80	27	70	1.29715e-06	0.00016	PGSC0003DMG400021365	02798850..2803550	YA1		3
chr01	2451315	TY	T	C		1	95	14	110	0.00227687	0.03498	PGSC0003DMG400021355	02947200..2952400	Conserved gene of unknown function		3
chr01	2451387	TY	A	G		149	67	216	32	2.52425e-06	0.00027	PGSC0003DMG400021355	02947200..2952400	Conserved gene of unknown function		3
chr01	2451390	TY	G	A		159	57	231	18	2.47163e-08	1e-05	PGSC0003DMG400021355	02947200..2952400	Conserved gene of unknown function		3
chr01	2451392	TY	T	A		149	67	216	33	4.75915e-06	0.00043	PGSC0003DMG400021355	02947200..2952400	Conserved gene of unknown function		3
chr01	2451522	TSY	G	A		89	54	123	29	0.000444508	0.02142	PGSC0003DMG400021355	02947200..2952400	Conserved gene of unknown function		3
chr01	2451529	TSY	G	A		83	48	113	25	0.000923752	0.03404	PGSC0003DMG400021355	02947200..2952400	Conserved gene of unknown function		3
chr01	2625957	TSY	T	C		90	3	81	18	0.000902977	0.03359	PGSC0003DMG402021320	03122000..3131500	Coatomer subunit beta-1
chr01	2633496	TSY	C	T		185	10	193	37	0.000300216	0.01662	PGSC0003DMG402021320	03122000..3131500	Coatomer subunit beta-1
chr01	2633545	TSY	C	T		163	7	159	31	0.000129581	0.0096	PGSC0003DMG402021320	03122000..3131500	Coatomer subunit beta-1
chr01	2634038	TSC	A	C		37	6	14	26	1.74238e-06	0.00014	PGSC0003DMG402021320	03122000..3131500	Coatomer subunit beta-1
chr01	2849932	TSC	G	T		188	45	153	79	0.000355755	0.0075	PGSC0003DMG400016416	03346100..3353000	Conserved gene of unknown function
chr01	2849932	TY	G	T		144	94	189	57	0.000124644	0.00462	PGSC0003DMG400016416	03346100..3353000	Conserved gene of unknown function
chr01	2849961	TSC	A	C		97	22	71	39	0.00443607	0.04548	PGSC0003DMG400016416	03346100..3353000	Conserved gene of unknown function
chr01	2849961	TY	A	C		60	40	92	24	0.00268158	0.03908	PGSC0003DMG400016416	03346100..3353000	Conserved gene of unknown function
chr01	2854327	TSC	C	T		87	15	52	29	0.00153444	0.02149	PGSC0003DMG400016416	03346100..3353000	Conserved gene of unknown function
chr01	2854386	TSC	C	T		145	27	97	49	0.00021771	0.00523	PGSC0003DMG400016416	03346100..3353000	Conserved gene of unknown function
chr01	2854426	TSC	A	G		202	40	160	65	0.00181974	0.02431	PGSC0003DMG400016416	03346100..3353000	Conserved gene of unknown function
chr01	2854520	TSC	G	A		92	43	124	14	1.14293e-05	0.00059	PGSC0003DMG400016416	03346100..3353000	Conserved gene of unknown function
chr01	2854542	TSC	G	A	G/S	127	12	92	35	8.33044e-05	0.00258	PGSC0003DMG400016416	03346100..3353000	Conserved gene of unknown function
chr01	2855212	TSC	G	A		102	3	75	14	0.00183116	0.02442	PGSC0003DMG400016416	03346100..3353000	Conserved gene of unknown function
chr01	2855266	TSC	G	A		91	10	37	15	0.00481398	0.04817	PGSC0003DMG400016416	03346100..3353000	Conserved gene of unknown function
chr01	2855273	TSC	C	T		55	49	41	12	0.00323991	0.03648	PGSC0003DMG400016416	03346100..3353000	Conserved gene of unknown function
chr01	2855839	TSC	A	G	K/R	114	23	70	38	0.00108125	0.01669	PGSC0003DMG400016416	03346100..3353000	Conserved gene of unknown function
chr01	2855856	TSC	G	T	A/S	126	25	76	43	0.000370071	0.00772	PGSC0003DMG400016416	03346100..3353000	Conserved gene of unknown function
chr01	3103878	TY	A	G		103	23	105	57	0.00147712	0.02605	PGSC0003DMG402016370	03599830..3600610	Conserved gene of unknown function	PGSC0003DMG401016370	4
chr01	3103878	TSY	A	G		85	21	80	55	0.000745213	0.02975	PGSC0003DMG402016370	03599830..3600610	Conserved gene of unknown function	PGSC0003DMG401016370	4
chr01	3103957	TSY	C	T	P/S	222	22	193	56	4.03162e-05	0.00443	PGSC0003DMG402016370	03599830..3600610	Conserved gene of unknown function	PGSC0003DMG401016370	4
chr01	3103987	TY	G	A	G/R	160	68	192	35	0.000311563	0.00884	PGSC0003DMG402016370	03599830..3600610	Conserved gene of unknown function	PGSC0003DMG401016370	4
chr01	3103987	TSY	G	A	G/R	140	65	203	25	1.17088e-07	8e-05	PGSC0003DMG402016370	03599830..3600610	Conserved gene of unknown function	PGSC0003DMG401016370	4
chr01	3187473	TSC	T	G		1	85	16	56	1.33903e-05	0.00066	PGSC0003DMG402016407	03682710..3686880	ADP-ribosylation factor		4
chr01	3187578	TSY	C	T		105	27	167	14	0.00120709	0.04037	PGSC0003DMG402016407	03682710..3686880	ADP-ribosylation factor		4
chr01	3309080	TSC	T	C		97	151	88	66	0.000469027	0.00917	PGSC0003DMG400016401	03805200..3813000	Electron transporter		4
chr01	3309117	TSY	G	A	V/I	164	20	169	70	4.03157e-06	0.00093	PGSC0003DMG400016401	03805200..3813000	Electron transporter		4
chr01	3309180	TY	T	G	S/A	188	44	222	18	0.000220122	0.00692	PGSC0003DMG400016401	03805200..3813000	Electron transporter		4
chr01	3309254	TSY	T	C		104	19	137	5	0.000953657	0.03471	PGSC0003DMG400016401	03805200..3813000	Electron transporter		4
chr01	3313123	TSC	G	A	R/Q	226	23	176	63	7.48661e-07	7e-05	PGSC0003DMG400016401	03805200..3813000	Electron transporter		4
chr01	3323047	TY	C	T		0	28	17	34	0.000312958	0.00886	PGSC0003DMG400016365	03818250..3821930	Phytosulfokine receptor		4
chr01	3323114	TSC	G	A	S/L	33	28	0	38	1.32412e-09	0	PGSC0003DMG400016365	03818250..3821930	Phytosulfokine receptor		4
chr01	3323114	TY	G	A	S/L	1	43	28	59	3.34054e-05	0.0018	PGSC0003DMG400016365	03818250..3821930	Phytosulfokine receptor		4
chr01	3323141	TSC	C	T	R/Q	16	39	0	37	0.000124791	0.00348	PGSC0003DMG400016365	03818250..3821930	Phytosulfokine receptor		4
chr01	3323141	TY	C	T	R/Q	0	40	28	57	4.69416e-06	0.00042	PGSC0003DMG400016365	03818250..3821930	Phytosulfokine receptor		4
chr01	3323188	TSC	G	A		34	61	0	57	8.74498e-09	0	PGSC0003DMG400016365	03818250..3821930	Phytosulfokine receptor		4
chr01	3323188	TY	G	A		0	48	19	65	0.000136966	0.00494	PGSC0003DMG400016365	03818250..3821930	Phytosulfokine receptor		4
chr01	3323233	TSC	C	T		49	47	0	53	1.02588e-12	0	PGSC0003DMG400016365	03818250..3821930	Phytosulfokine receptor		4
chr01	3323233	TY	C	T		4	44	29	67	0.0030219	0.04237	PGSC0003DMG400016365	03818250..3821930	Phytosulfokine receptor		4
chr01	3323233	TSY	C	T		28	17	29	59	0.00162929	0.04864	PGSC0003DMG400016365	03818250..3821930	Phytosulfokine receptor		4
chr01	3464769	TY	T	C		49	27	76	12	0.00157103	0.02716	PGSC0003DMG402016396	03959410..3963510	Phosphotyrosyl phosphatase activator protein		4
chr01	3464769	TSY	T	C		48	29	67	6	1.65014e-05	0.00243	PGSC0003DMG402016396	03959410..3963510	Phosphotyrosyl phosphatase activator protein		4
chr01	3464851	TSC	C	T		216	31	120	54	4.30079e-06	0.00028	PGSC0003DMG402016396	03959410..3963510	Phosphotyrosyl phosphatase activator protein		4
chr01	3464851	TSY	C	T		185	27	146	57	0.000133028	0.00976	PGSC0003DMG402016396	03959410..3963510	Phosphotyrosyl phosphatase activator protein		4
chr01	3464892	TSY	C	T		148	36	165	11	0.000155904	0.01081	PGSC0003DMG402016396	03959410..3963510	Phosphotyrosyl phosphatase activator protein		4
chr01	3464907	TSY	G	T		121	50	142	19	0.000127836	0.0095	PGSC0003DMG402016396	03959410..3963510	Phosphotyrosyl phosphatase activator protein		4
chr01	3464972	TSY	A	G		125	125	167	82	0.00013173	0.0097	PGSC0003DMG402016396	03959410..3963510	Phosphotyrosyl phosphatase activator protein		4
chr01	3564187	TSY	A	T		184	15	167	46	5.03627e-05	0.00517	PGSC0003DMG400016394	04054200..4064200	L19 ribosomal protein		4
chr01	3564258	TSY	A	G		133	6	159	29	0.00105334	0.03702	PGSC0003DMG400016394	04054200..4064200	L19 ribosomal protein		4
chr01	3564260	TSY	C	T		132	7	154	34	0.000331647	0.01772	PGSC0003DMG400016394	04054200..4064200	L19 ribosomal protein		4
chr01	3564292	TSC	T	A		194	22	155	42	0.00254725	0.03086	PGSC0003DMG400016394	04054200..4064200	L19 ribosomal protein		4
chr01	3564292	TSY	T	A		165	9	180	54	3.18971e-07	0.00016	PGSC0003DMG400016394	04054200..4064200	L19 ribosomal protein		4
chr01	3788758	TSC	T	C		17	81	0	77	3.49427e-05	0.00136	PGSC0003DMG400010703	04283200..4290200	Translocation protein sec62		4
chr01	3788783	TSY	A	T		83	5	98	26	0.00157626	0.04774	PGSC0003DMG400010703	04283200..4290200	Translocation protein sec62		4
chr01	3788788	TSC	T	C		17	92	0	99	1.04071e-05	0.00055	PGSC0003DMG400010703	04283200..4290200	Translocation protein sec62		4
chr01	3788904	TSC	G	T		118	18	72	39	6.54743e-05	0.00216	PGSC0003DMG400010703	04283200..4290200	Translocation protein sec62		4
chr01	3788906	TSC	G	C		19	118	3	110	0.00152349	0.02137	PGSC0003DMG400010703	04283200..4290200	Translocation protein sec62		4
chr01	3788906	TY	G	C		0	108	11	123	0.00134352	0.02438	PGSC0003DMG400010703	04283200..4290200	Translocation protein sec62		4
chr01	3788967	TSC	A	G		106	59	100	17	6.98323e-05	0.00227	PGSC0003DMG400010703	04283200..4290200	Translocation protein sec62		4
chr01	3788982	TSC	G	A		45	33	44	10	0.00466093	0.04712	PGSC0003DMG400010703	04283200..4290200	Translocation protein sec62		4
chr01	3839919	TSC	A	G		12	63	0	63	0.000472926	0.00922	PGSC0003DMG400038851	04336000..4342800	Gene of unknown function		4
chr01	3839923	TSC	G	A		125	16	74	34	0.000109601	0.00316	PGSC0003DMG400038851	04336000..4342800	Gene of unknown function		4
chr01	3839963	TSC	A	G		34	130	1	126	1.72122e-08	0	PGSC0003DMG400038851	04336000..4342800	Gene of unknown function		4
chr01	3839963	TY	A	G		0	111	15	143	0.000280145	0.0082	PGSC0003DMG400038851	04336000..4342800	Gene of unknown function		4
chr01	3839971	TY	C	T		19	85	89	63	6.94982e-11	0	PGSC0003DMG400038851	04336000..4342800	Gene of unknown function		4
chr01	3839971	TSY	C	T		27	80	78	51	5.56537e-08	5e-05	PGSC0003DMG400038851	04336000..4342800	Gene of unknown function		4
chr01	3839974	TSC	C	G		135	15	82	35	5.72867e-05	0.00196	PGSC0003DMG400038851	04336000..4342800	Gene of unknown function		4
chr01	3839974	TSY	C	G		96	8	92	30	0.000655316	0.02744	PGSC0003DMG400038851	04336000..4342800	Gene of unknown function		4
chr01	3839995	TY	A	G		15	83	66	77	4.39759e-07	7e-05	PGSC0003DMG400038851	04336000..4342800	Gene of unknown function		4
chr01	3839995	TSY	A	G		22	80	52	65	0.000358661	0.01865	PGSC0003DMG400038851	04336000..4342800	Gene of unknown function		4
chr01	3840060	TY	G	A		56	51	121	47	0.00120258	0.0226	PGSC0003DMG400038851	04336000..4342800	Gene of unknown function		4
chr01	3840075	TSC	G	A		14	135	0	105	0.000496874	0.00956	PGSC0003DMG400038851	04336000..4342800	Gene of unknown function		4
chr01	4456100	TSC	A	G	F/S	63	66	37	97	0.000571512	0.01057	PGSC0003DMG400022699	05088300..5094000	Resistance gene
chr01	4456124	TSC	G	C	S/C	126	121	67	178	7.76831e-08	1e-05	PGSC0003DMG400022699	05088300..5094000	Resistance gene
chr01	4456140	TSC	C	T	G/R	162	88	198	49	0.00013368	0.00367	PGSC0003DMG400022699	05088300..5094000	Resistance gene
chr01	4456227	TSC	T	C	T/A	81	102	46	119	0.00177729	0.0239	PGSC0003DMG400022699	05088300..5094000	Resistance gene
chr01	4456227	TY	T	C	T/A	50	138	79	102	0.000699672	0.01554	PGSC0003DMG400022699	05088300..5094000	Resistance gene
chr01	4456242	TSC	G	A	H/Y	165	44	162	14	0.000318077	0.00691	PGSC0003DMG400022699	05088300..5094000	Resistance gene
chr01	4456250	TSC	G	A	S/L	167	54	171	15	9.23392e-06	0.0005	PGSC0003DMG400022699	05088300..5094000	Resistance gene
chr01	4754838	TY	T	C		69	50	61	102	0.000713535	0.01575	PGSC0003DMG400022692	05385380..5389520	RNA-binding protein AKIP1
chr01	4755289	TSC	T	C		104	40	99	7	1.44201e-05	0.0007	PGSC0003DMG400022692	05385380..5389520	RNA-binding protein AKIP1
chr01	4889301	TY	C	T		28	37	65	22	0.000100679	0.00397	PGSC0003DMG400022700	05520600..5523890	Forkhead-associated domain-containing protein
chr01	4889321	TY	A	G		69	34	127	9	1.52933e-07	3e-05	PGSC0003DMG400022700	05520600..5523890	Forkhead-associated domain-containing protein
chr01	4889321	TSY	A	G		74	33	111	8	3.55549e-06	0.00085	PGSC0003DMG400022700	05520600..5523890	Forkhead-associated domain-containing protein
chr01	5444679	TSC	A	G	T/A	82	25	80	4	0.000396628	0.00811	PGSC0003DMG400013130	06314230..6316030	Conserved gene of unknown function		5
chr01	5444703	TSC	T	A	F/I	118	7	81	18	0.00467528	0.0472	PGSC0003DMG400013130	06314230..6316030	Conserved gene of unknown function		5
chr01	5444818	TSC	C	T	A/V	188	18	116	64	1.4052e-10	0	PGSC0003DMG400013130	06314230..6316030	Conserved gene of unknown function		5
chr01	5444895	TSC	T	G	C/G	135	21	98	54	9.09424e-06	0.00049	PGSC0003DMG400013130	06314230..6316030	Conserved gene of unknown function		5
chr01	5445020	TSC	T	C		8	11	24	4	0.00335657	0.03736	PGSC0003DMG400013130	06314230..6316030	Conserved gene of unknown function		5
chr01	5446592	TSC	T	A		93	4	53	27	1.82002e-07	3e-05	PGSC0003DMG400013134	06317450..6319110	Conserved gene of unknown function		5
chr01	5589811	TY	C	A		201	48	242	7	2.02855e-09	0	PGSC0003DMG400030284	06451400..6465400	Cleavage/polyadenylation factor ia subunit clp1p		5
chr01	5589811	TSY	C	A		195	32	240	9	5.55651e-05	0.00552	PGSC0003DMG400030284	06451400..6465400	Cleavage/polyadenylation factor ia subunit clp1p		5
chr01	5589828	TSC	T	C		93	146	61	177	0.00235692	0.02922	PGSC0003DMG400030284	06451400..6465400	Cleavage/polyadenylation factor ia subunit clp1p		5
chr01	5589975	TY	A	G		32	34	73	27	0.00175449	0.02929	PGSC0003DMG400030284	06451400..6465400	Cleavage/polyadenylation factor ia subunit clp1p		5
chr01	5593621	TSC	C	T		52	103	23	122	0.000486471	0.00942	PGSC0003DMG400030284	06451400..6465400	Cleavage/polyadenylation factor ia subunit clp1p		5
chr01	5593637	TSC	A	G		44	75	20	99	0.000701729	0.01225	PGSC0003DMG400030284	06451400..6465400	Cleavage/polyadenylation factor ia subunit clp1p		5
chr01	5593637	TY	A	G		17	108	46	117	0.00380882	0.04947	PGSC0003DMG400030284	06451400..6465400	Cleavage/polyadenylation factor ia subunit clp1p		5
chr01	5593642	TY	A	T		87	11	96	36	0.00287573	0.041	PGSC0003DMG400030284	06451400..6465400	Cleavage/polyadenylation factor ia subunit clp1p		5
chr01	5594128	TSC	C	T		70	30	34	42	0.00109151	0.0168	PGSC0003DMG400030284	06451400..6465400	Cleavage/polyadenylation factor ia subunit clp1p		5
chr01	35518202	TSC	G	T		166	20	91	31	0.000940422	0.01511	PGSC0003DMG400010855	07602330..7606990	Protein phosphatase inhibitor 2 containing protein
chr01	35518230	TSC	A	C		218	26	132	49	1.69503e-05	0.00079	PGSC0003DMG400010855	07602330..7606990	Protein phosphatase inhibitor 2 containing protein
chr01	26316377	TSY	T	C		109	24	96	52	0.0012902	0.04209	PGSC0003DMG400033931	09294520..9295050	Gene of unknown function
chr01	26316386	TSY	T	G		120	24	100	51	0.000809854	0.03137	PGSC0003DMG400033931	09294520..9295050	Gene of unknown function
chr01	26316419	TSC	C	T		177	21	167	4	0.00151578	0.02129	PGSC0003DMG400033931	09294520..9295050	Gene of unknown function
chr01	26316421	TY	C	G		126	23	125	58	0.000775573	0.01669	PGSC0003DMG400033931	09294520..9295050	Gene of unknown function
chr01	26316421	TSY	C	G		113	22	89	56	3.21532e-05	0.00381	PGSC0003DMG400033931	09294520..9295050	Gene of unknown function
chr01	26316426	TSY	T	C		103	25	84	56	0.000307652	0.01688	PGSC0003DMG400033931	09294520..9295050	Gene of unknown function
chr01	26316511	TY	G	A		234	11	214	36	0.000180582	0.00603	PGSC0003DMG400033931	09294520..9295050	Gene of unknown function
chr01	26316511	TSY	G	A		213	5	209	39	2.86372e-07	0.00014	PGSC0003DMG400033931	09294520..9295050	Gene of unknown function
chr01	26316518	TSC	C	T	R/C	184	65	210	25	1.25788e-05	0.00063	PGSC0003DMG400033931	09294520..9295050	Gene of unknown function
chr01	26316660	TSC	T	G	L/R	13	26	24	11	0.00485836	0.04847	PGSC0003DMG400033931	09294520..9295050	Gene of unknown function
chr01	30909049	TSC	G	A		173	54	201	13	1.27853e-07	2e-05	PGSC0003DMG400036540	09622090..9623440	Conserved gene of unknown function
chr01	30909068	TSC	A	G		109	141	155	81	1.26715e-06	0.00011	PGSC0003DMG400036540	09622090..9623440	Conserved gene of unknown function
chr01	30909101	TSC	G	A		183	12	154	32	0.00113525	0.01729	PGSC0003DMG400036540	09622090..9623440	Conserved gene of unknown function
chr01	30767899	TSC	T	C		122	115	151	81	0.00365349	0.03969	PGSC0003DMG400014951	09755600..9765200	Retrotransposon gag protein
chr01	30767899	TY	T	C		133	86	105	131	0.000704504	0.01561	PGSC0003DMG400014951	09755600..9765200	Retrotransposon gag protein
chr01	30767984	TSY	G	A		104	5	103	23	0.00113275	0.03874	PGSC0003DMG400014951	09755600..9765200	Retrotransposon gag protein
chr01	30768035	TSC	C	G		53	80	79	31	7.39397e-07	7e-05	PGSC0003DMG400014951	09755600..9765200	Retrotransposon gag protein
chr01	30768062	TSC	A	C		35	55	54	17	2.92964e-06	0.00021	PGSC0003DMG400014951	09755600..9765200	Retrotransposon gag protein
chr01	34294792	TSC	C	T	S/L	33	16	47	4	0.00241643	0.02973	PGSC0003DMG400035531	10948040..10948660	DnaJ protein
chr01	34294822	TY	A	C	Q/P	79	7	89	30	0.00164519	0.02802	PGSC0003DMG400035531	10948040..10948660	DnaJ protein
chr01	34294878	TSC	G	T		71	40	37	62	0.000174902	0.00445	PGSC0003DMG400035531	10948040..10948660	DnaJ protein
chr01	34294951	TSC	T	G	I/S	154	71	71	135	1.37116e-12	0	PGSC0003DMG400035531	10948040..10948660	DnaJ protein
chr01	35086913	TY	C	A	L/I	83	29	140	18	0.00307054	0.04282	PGSC0003DMG400001190	11737500..11743900	Conserved gene of unknown function
chr01	35086951	TY	A	T		120	56	116	134	8.34977e-06	0.00065	PGSC0003DMG400001190	11737500..11743900	Conserved gene of unknown function
chr01	35088461	TSC	G	A	V/I	187	28	155	7	0.00387052	0.04129	PGSC0003DMG400001190	11737500..11743900	Conserved gene of unknown function
chr01	35090446	TY	T	A		33	11	30	35	0.00317662	0.04382	PGSC0003DMG400001189	11742660..11744610	Heat shock protein binding protein
chr01	35090446	TSY	T	A		30	9	22	38	9.48314e-05	0.00786	PGSC0003DMG400001189	11742660..11744610	Heat shock protein binding protein
chr01	35090463	TSY	G	A		41	5	31	28	5.11096e-05	0.00522	PGSC0003DMG400001189	11742660..11744610	Heat shock protein binding protein
chr01	35090476	TSY	A	C		44	14	26	53	8.80825e-07	0.00032	PGSC0003DMG400001189	11742660..11744610	Heat shock protein binding protein
chr01	35090479	TSY	C	G		48	11	35	41	3.40249e-05	0.00395	PGSC0003DMG400001189	11742660..11744610	Heat shock protein binding protein
chr01	10775748	TY	C	T		7	34	33	13	3.80948e-07	7e-05	PGSC0003DMG400040568	14126690..14129020	Gene of unknown function
chr01	10775837	TY	G	A		4	14	21	8	0.00108491	0.02103	PGSC0003DMG400040568	14126690..14129020	Gene of unknown function
chr01	10775879	TY	G	A		1	9	17	6	0.00147849	0.02607	PGSC0003DMG400040568	14126690..14129020	Gene of unknown function
chr01	11127337	TSC	G	T		131	17	122	3	0.00438005	0.04508	PGSC0003DMG400035787	14477980..14482460	Conserved gene of unknown function
chr01	11127341	TSC	C	T		145	7	101	26	5.58289e-05	0.00192	PGSC0003DMG400035787	14477980..14482460	Conserved gene of unknown function
chr01	11127362	TSC	C	T		152	30	144	7	0.000694454	0.01215	PGSC0003DMG400035787	14477980..14482460	Conserved gene of unknown function
chr01	11127368	TSC	T	C		24	162	43	114	0.000963535	0.01538	PGSC0003DMG400035787	14477980..14482460	Conserved gene of unknown function
chr01	11127368	TSY	T	C		29	116	52	87	0.00153281	0.04693	PGSC0003DMG400035787	14477980..14482460	Conserved gene of unknown function
chr01	11127383	TSC	G	A		172	4	130	29	5.43839e-07	6e-05	PGSC0003DMG400035787	14477980..14482460	Conserved gene of unknown function
chr01	11127478	TSC	G	A		60	13	33	32	0.000114623	0.00327	PGSC0003DMG400035787	14477980..14482460	Conserved gene of unknown function
chr01	46946053	TSC	T	C		5	185	26	88	3.13051e-08	1e-05	PGSC0003DMG400046167	17561360..17562830	Gene of unknown function
chr01	46946091	TSC	C	T	D/N	14	80	25	32	0.0001175	0.00333	PGSC0003DMG400046167	17561360..17562830	Gene of unknown function
chr01	46946097	TSC	A	G		10	88	18	40	0.00204959	0.02646	PGSC0003DMG400046167	17561360..17562830	Gene of unknown function
chr01	29859588	TSY	C	G	G/R	19	67	51	66	0.00166765	0.04938	PGSC0003DMG400037163	18447630..18448560	Conserved gene of unknown function
chr01	29859595	TSY	C	A		17	66	48	61	0.000692391	0.02843	PGSC0003DMG400037163	18447630..18448560	Conserved gene of unknown function
chr01	29859618	TSY	A	C	S/A	15	60	44	52	0.000602297	0.02598	PGSC0003DMG400037163	18447630..18448560	Conserved gene of unknown function
chr01	29859624	TSY	T	C	T/A	14	60	42	51	0.000478774	0.02246	PGSC0003DMG400037163	18447630..18448560	Conserved gene of unknown function
chr01	29859637	TSY	T	C		0	73	14	76	0.000284489	0.01606	PGSC0003DMG400037163	18447630..18448560	Conserved gene of unknown function
chr01	29859660	TSC	C	T	A/T	100	104	121	42	1.17441e-06	0.00011	PGSC0003DMG400037163	18447630..18448560	Conserved gene of unknown function
chr01	29859717	TSC	A	C	F/V	0	241	13	169	1.34539e-05	0.00066	PGSC0003DMG400037163	18447630..18448560	Conserved gene of unknown function
chr01	29859717	TSY	A	C	F/V	0	191	11	162	0.000235343	0.01415	PGSC0003DMG400037163	18447630..18448560	Conserved gene of unknown function
chr01	20174291	TSC	C	T		183	36	186	7	1.61213e-05	0.00076	PGSC0003DMG400039140	20911580..20912110	Integrase core domain containing protein
chr01	22276552	TY	G	A		154	79	194	52	0.00205619	0.03261	PGSC0003DMG400037477	22289250..22291960	Gag/pol polyprotein
chr01	22276552	TSY	G	A		148	62	178	32	0.000637117	0.02695	PGSC0003DMG400037477	22289250..22291960	Gag/pol polyprotein
chr01	22277500	TY	C	T		223	26	192	55	0.000399135	0.01051	PGSC0003DMG400037477	22289250..22291960	Gag/pol polyprotein
chr01	22277503	TY	G	C		240	9	203	46	9.48704e-08	2e-05	PGSC0003DMG400037477	22289250..22291960	Gag/pol polyprotein
chr01	22277503	TSY	G	C		199	16	204	45	0.000840678	0.03215	PGSC0003DMG400037477	22289250..22291960	Gag/pol polyprotein
chr01	22853201	TSC	C	T		48	21	18	26	0.00336472	0.03742	PGSC0003DMG400042902	22865600..22868730	Gene of unknown function
chr01	22853282	TY	T	C		3	91	42	106	1.49388e-07	3e-05	PGSC0003DMG400042902	22865600..22868730	Gene of unknown function
chr01	22853282	TSY	T	C		8	79	36	85	0.000279466	0.01584	PGSC0003DMG400042902	22865600..22868730	Gene of unknown function
chr01	22937367	TY	C	G		153	53	199	29	0.000579853	0.01364	PGSC0003DMG400036721	22947400..22956000	Gene of unknown function
chr01	22937367	TSY	C	G		99	57	149	24	1.85554e-06	0.00055	PGSC0003DMG400036721	22947400..22956000	Gene of unknown function
chr01	22937881	TSY	C	T		115	9	125	39	0.000191108	0.01238	PGSC0003DMG400036721	22947400..22956000	Gene of unknown function
chr01	23705995	TY	G	A		170	51	224	19	4.27966e-06	0.0004	PGSC0003DMG400046581	23717370..23721410	chromo' domain containing protein (chromatin organization modifier)
chr01	23705995	TSY	G	A		161	59	212	27	2.35998e-05	0.00311	PGSC0003DMG400046581	23717370..23721410	chromo' domain containing protein (chromatin organization modifier)
chr01	23873663	TY	T	G	S/A	146	85	182	53	0.000814429	0.01723	PGSC0003DMG400044281	23885000..23893700	Gag-pol protein
chr01	23873663	TSY	T	G	S/A	144	83	177	49	0.000619022	0.02645	PGSC0003DMG400044281	23885000..23893700	Gag-pol protein
chr01	23873738	TY	G	C		163	28	150	71	4.51232e-05	0.00224	PGSC0003DMG400044281	23885000..23893700	Gag-pol protein
chr01	23873738	TSY	G	C		129	18	121	64	1.85225e-06	0.00055	PGSC0003DMG400044281	23885000..23893700	Gag-pol protein
chr01	23873747	TY	G	A		193	12	198	44	8.36781e-05	0.00348	PGSC0003DMG400044281	23885000..23893700	Gag-pol protein
chr01	8889350	TY	A	T		90	28	158	15	0.000631106	0.01447	PGSC0003DMG400026607	28087040..28089300	Gene of unknown function
chr01	8889398	TSC	C	T		166	59	184	23	7.27069e-05	0.00233	PGSC0003DMG400026607	28087040..28089300	Gene of unknown function
chr01	8889398	TY	C	T		177	44	224	22	0.000812338	0.0172	PGSC0003DMG400026607	28087040..28089300	Gene of unknown function
chr01	8889398	TSY	C	T		120	44	223	22	2.23388e-06	0.00062	PGSC0003DMG400026607	28087040..28089300	Gene of unknown function
chr01	8889413	TY	C	T		184	65	215	31	0.000161535	0.00556	PGSC0003DMG400026607	28087040..28089300	Gene of unknown function
chr01	8889462	TY	T	C		155	46	192	23	0.000933388	0.01897	PGSC0003DMG400026607	28087040..28089300	Gene of unknown function
chr01	9657575	TSY	C	T		154	6	155	28	0.000423458	0.02076	PGSC0003DMG400006516	28857050..28858950	L-ascorbate oxidase homolog
chr01	9657605	TY	C	T		173	76	202	44	0.00113361	0.02168	PGSC0003DMG400006516	28857050..28858950	L-ascorbate oxidase homolog
chr01	9657626	TSC	T	C		185	47	216	17	4.62123e-05	0.00168	PGSC0003DMG400006516	28857050..28858950	L-ascorbate oxidase homolog
chr01	9657635	TSC	C	T		180	46	216	15	1.41679e-05	0.00069	PGSC0003DMG400006516	28857050..28858950	L-ascorbate oxidase homolog
chr01	9657722	TSY	T	C		196	21	190	49	0.00166927	0.04941	PGSC0003DMG400006516	28857050..28858950	L-ascorbate oxidase homolog
chr01	9657776	TSC	C	T		102	95	90	36	0.000486172	0.00941	PGSC0003DMG400006516	28857050..28858950	L-ascorbate oxidase homolog
chr01	25995079	TSC	G	A		178	17	101	28	0.00158007	0.02197	PGSC0003DMG400036192	29955700..29958060	Gene of unknown function
chr01	25995145	TY	A	T		58	68	100	33	2.01274e-06	0.00023	PGSC0003DMG400036192	29955700..29958060	Gene of unknown function
chr01	25995145	TSY	A	T		50	66	77	33	5.4756e-05	0.00546	PGSC0003DMG400036192	29955700..29958060	Gene of unknown function
chr01	25995158	TSC	A	C		101	38	96	12	0.00220266	0.02783	PGSC0003DMG400036192	29955700..29958060	Gene of unknown function
chr01	25995169	TY	C	T		78	61	41	113	2.8837e-07	5e-05	PGSC0003DMG400036192	29955700..29958060	Gene of unknown function
chr01	25995169	TSY	C	T		78	52	41	84	1.78618e-05	0.00255	PGSC0003DMG400036192	29955700..29958060	Gene of unknown function
chr01	25927430	TSC	A	G		70	17	26	20	0.00451815	0.04608	PGSC0003DMG400040074	30023510..30026390	Gene of unknown function
chr01	25927503	TSC	C	A		162	42	64	42	0.000457455	0.00901	PGSC0003DMG400040074	30023510..30026390	Gene of unknown function
chr01	25927534	TSC	G	T		64	140	68	50	6.75797e-06	0.0004	PGSC0003DMG400040074	30023510..30026390	Gene of unknown function
chr01	25927558	TSC	C	G		139	40	98	5	7.14544e-05	0.0023	PGSC0003DMG400040074	30023510..30026390	Gene of unknown function
chr01	25597315	TSC	C	T		54	68	58	27	0.000699883	0.01222	PGSC0003DMG400036387	30354040..30356840	Integrase core domain containing protein
chr01	25597323	TSC	T	A		75	61	71	25	0.0038081	0.04086	PGSC0003DMG400036387	30354040..30356840	Integrase core domain containing protein
chr01	25597369	TSC	G	C		47	66	57	32	0.0018171	0.02428	PGSC0003DMG400036387	30354040..30356840	Integrase core domain containing protein
chr01	25597406	TSC	G	T		86	122	99	64	0.000246543	0.00574	PGSC0003DMG400036387	30354040..30356840	Integrase core domain containing protein
chr01	25597491	TSC	A	G		78	47	86	12	1.6065e-05	0.00076	PGSC0003DMG400036387	30354040..30356840	Integrase core domain containing protein
chr01	25597505	TSC	G	A		120	33	103	6	0.000326113	0.00704	PGSC0003DMG400036387	30354040..30356840	Integrase core domain containing protein
chr01	25597567	TSC	G	A		44	58	41	17	0.000953903	0.01527	PGSC0003DMG400036387	30354040..30356840	Integrase core domain containing protein
chr01	25597569	TSC	C	T		42	56	41	17	0.00089049	0.01455	PGSC0003DMG400036387	30354040..30356840	Integrase core domain containing protein
chr01	25246332	TSC	G	T	V/L	41	53	49	10	1.54207e-06	0.00013	PGSC0003DMG400040837	30706030..30708230	Conserved gene of unknown function		6
chr01	25246332	TY	G	T	V/L	68	8	55	24	0.00272456	0.03951	PGSC0003DMG400040837	30706030..30708230	Conserved gene of unknown function		6
chr01	25246389	TSC	G	A		14	25	23	4	0.000111247	0.0032	PGSC0003DMG400040837	30706030..30708230	Conserved gene of unknown function		6
chr01	25245425	TSY	G	A	A/T	49	25	31	57	0.000137339	0.00995	PGSC0003DMG400040837	30706040..30708230	Conserved gene of unknown function		6
chr01	25245427	TSY	G	A		46	25	30	57	0.000213493	0.01327	PGSC0003DMG400040837	30706040..30708230	Conserved gene of unknown function		6
chr01	25212354	TSC	G	C		169	57	156	17	8.24702e-05	0.00256	PGSC0003DMG400046997	30739700..30743340	Gene of unknown function		6
chr01	25212414	TSC	T	C		57	116	103	69	6.12071e-07	6e-05	PGSC0003DMG400046997	30739700..30743340	Gene of unknown function		6
chr01	25212455	TSC	C	T		186	39	194	7	2.85509e-06	0.00021	PGSC0003DMG400046997	30739700..30743340	Gene of unknown function		6
chr01	25212455	TSY	C	T		147	32	205	15	0.000898027	0.03347	PGSC0003DMG400046997	30739700..30743340	Gene of unknown function		6
chr01	25212527	TSC	A	G		34	61	41	24	0.000757606	0.01294	PGSC0003DMG400046997	30739700..30743340	Gene of unknown function		6
chr01	25108974	TY	G	A		196	35	210	14	0.00235658	0.03577	PGSC0003DMG400021499	30833800..30844000	Ctp synthase		6
chr01	25109164	TSC	A	G		102	13	65	25	0.00351353	0.03859	PGSC0003DMG400021499	30833800..30844000	Ctp synthase		6
chr01	25111995	TY	C	A		237	8	211	34	3.28455e-05	0.00178	PGSC0003DMG400021499	30833800..30844000	Ctp synthase		6
chr01	25111995	TSY	C	A		211	6	212	34	1.88134e-05	0.00265	PGSC0003DMG400021499	30833800..30844000	Ctp synthase		6
chr01	25112009	TSC	G	T		172	73	122	109	0.000107648	0.00312	PGSC0003DMG400021499	30833800..30844000	Ctp synthase		6
chr01	25112102	TSC	G	C		181	53	177	12	2.59933e-06	0.00019	PGSC0003DMG400021499	30833800..30844000	Ctp synthase		6
chr01	24802350	TSC	A	G		25	191	6	191	0.00116813	0.01766	PGSC0003DMG400044310	31149200..31154700	Gene of unknown function
chr01	24802350	TY	A	G		0	206	22	215	6.81947e-07	0.0001	PGSC0003DMG400044310	31149200..31154700	Gene of unknown function
chr01	24802377	TSC	A	G		13	180	1	178	0.00167603	0.02292	PGSC0003DMG400044310	31149200..31154700	Gene of unknown function
chr01	24802377	TY	A	G		0	184	11	219	0.00150815	0.02642	PGSC0003DMG400044310	31149200..31154700	Gene of unknown function
chr01	24736180	TSC	C	T	T/I	190	16	128	30	0.00221129	0.02792	PGSC0003DMG400041523	31214650..31216660	Gene of unknown function
chr01	24736180	TY	C	T	T/I	114	36	193	15	1.1429e-05	0.00082	PGSC0003DMG400041523	31214650..31216660	Gene of unknown function
chr01	13680963	TSC	C	T	P/L	90	28	98	6	0.000165151	0.00427	PGSC0003DMG400040459	32737320..32742030	F-box/kelch-repeat protein
chr01	13681002	TSC	C	T		112	24	137	6	0.000355191	0.00749	PGSC0003DMG400040459	32737320..32742030	F-box/kelch-repeat protein
chr01	13681003	TSC	T	G		112	25	138	6	0.000198613	0.00488	PGSC0003DMG400040459	32737320..32742030	F-box/kelch-repeat protein
chr01	13681028	TSC	C	T		125	31	150	6	1.36396e-05	0.00067	PGSC0003DMG400040459	32737320..32742030	F-box/kelch-repeat protein
chr01	13769413	TSC	A	G		126	122	164	85	0.00075604	0.01292	PGSC0003DMG400044889	32827000..32833500	Conserved gene of unknown function
chr01	13769413	TSY	A	G		107	110	165	57	9.09961e-08	6e-05	PGSC0003DMG400044889	32827000..32833500	Conserved gene of unknown function
chr01	13769546	TSC	C	T		70	40	103	22	0.00171278	0.02328	PGSC0003DMG400044889	32827000..32833500	Conserved gene of unknown function
chr01	13770074	TSC	A	G		7	17	22	4	0.000132004	0.00363	PGSC0003DMG400044889	32827000..32833500	Conserved gene of unknown function
chr01	13770094	TSC	T	C		15	28	30	5	7.57565e-06	0.00043	PGSC0003DMG400044889	32827000..32833500	Conserved gene of unknown function
chr01	13770193	TSC	C	A		78	85	93	42	0.000270353	0.00614	PGSC0003DMG400044889	32827000..32833500	Conserved gene of unknown function
chr01	13770193	TSY	C	A		71	58	131	46	0.000626852	0.02666	PGSC0003DMG400044889	32827000..32833500	Conserved gene of unknown function
chr01	13770255	TSC	T	G		70	75	97	48	0.00195024	0.02554	PGSC0003DMG400044889	32827000..32833500	Conserved gene of unknown function
chr01	13770312	TSC	A	T		102	135	162	72	1.23602e-08	0	PGSC0003DMG400044889	32827000..32833500	Conserved gene of unknown function
chr01	13770314	TSC	T	G		102	137	168	72	1.74239e-09	0	PGSC0003DMG400044889	32827000..32833500	Conserved gene of unknown function
chr01	13770357	TSC	A	G		125	64	185	25	1.52002e-07	2e-05	PGSC0003DMG400044889	32827000..32833500	Conserved gene of unknown function
chr01	13770395	TSC	T	C		19	111	40	84	0.00102751	0.0161	PGSC0003DMG400044889	32827000..32833500	Conserved gene of unknown function
chr01	13770415	TSC	G	A		85	38	94	15	0.00270269	0.03218	PGSC0003DMG400044889	32827000..32833500	Conserved gene of unknown function
chr01	13770429	TY	C	T		56	50	123	49	0.00195699	0.03153	PGSC0003DMG400044889	32827000..32833500	Conserved gene of unknown function
chr01	14420690	TSC	T	G		56	18	64	4	0.00246671	0.03017	PGSC0003DMG400041247	33480030..33481680	Gene of unknown function
chr01	14420690	TSY	T	G		42	15	69	4	0.00103777	0.03669	PGSC0003DMG400041247	33480030..33481680	Gene of unknown function
chr01	14420781	TY	A	C		122	46	113	100	0.000125593	0.00464	PGSC0003DMG400041247	33480030..33481680	Gene of unknown function
chr01	14420781	TSY	A	C		109	32	91	90	5.98066e-07	0.00024	PGSC0003DMG400041247	33480030..33481680	Gene of unknown function
chr01	14420943	TSC	A	G		84	35	70	64	0.00307793	0.03519	PGSC0003DMG400041247	33480030..33481680	Gene of unknown function
chr01	14446295	TSY	C	A		15	12	36	2	0.000371729	0.01911	PGSC0003DMG400035198	33505870..33506950	Polyprotein protein
chr01	14446383	TSC	G	A		54	54	63	20	0.000310391	0.00679	PGSC0003DMG400035198	33505870..33506950	Polyprotein protein
chr01	14446383	TSY	G	A		47	26	106	13	7.1928e-05	0.00652	PGSC0003DMG400035198	33505870..33506950	Polyprotein protein
chr01	14446423	TSC	G	A	T/I	40	49	51	13	1.41196e-05	0.00069	PGSC0003DMG400035198	33505870..33506950	Polyprotein protein
chr01	14446423	TSY	G	A	T/I	40	21	75	9	0.000749044	0.02985	PGSC0003DMG400035198	33505870..33506950	Polyprotein protein
chr01	16132526	TY	C	A	H/Q	21	89	4	105	0.000447213	0.01138	PGSC0003DMG400031284	35191630..35192700	Hcr9-OR3A
chr01	16132526	TSY	C	A	H/Q	21	61	3	90	1.39287e-05	0.00217	PGSC0003DMG400031284	35191630..35192700	Hcr9-OR3A
chr01	16132605	TY	C	T	H/Y	20	57	2	87	4.52787e-06	0.00041	PGSC0003DMG400031284	35191630..35192700	Hcr9-OR3A
chr01	16132605	TSY	C	T	H/Y	21	42	2	69	1.71794e-06	0.00052	PGSC0003DMG400031284	35191630..35192700	Hcr9-OR3A
chr01	16723863	TY	A	C	I/R	17	41	4	68	0.000508928	0.01246	PGSC0003DMG400034936	35783410..35785210	Polyprotein protein
chr01	16723863	TSY	A	C	I/R	17	32	0	54	5.65551e-07	0.00023	PGSC0003DMG400034936	35783410..35785210	Polyprotein protein
chr01	16822950	TSC	G	C		44	33	72	7	1.01703e-06	9e-05	PGSC0003DMG401001235	35875100..35883400	EMB1441
chr01	16823116	TY	G	A		225	15	209	40	0.000563251	0.01338	PGSC0003DMG401001235	35875100..35883400	EMB1441
chr01	17919005	TY	A	G		26	96	4	167	1.42604e-07	3e-05	PGSC0003DMG400036995	36972600..36980100	Gene of unknown function
chr01	17919005	TSY	A	G		27	68	3	146	8.83868e-10	0	PGSC0003DMG400036995	36972600..36980100	Gene of unknown function
chr01	17919028	TSC	C	G		88	44	67	87	0.000130724	0.0036	PGSC0003DMG400036995	36972600..36980100	Gene of unknown function
chr01	17919143	TSY	G	A		107	15	97	40	0.00125732	0.04138	PGSC0003DMG400036995	36972600..36980100	Gene of unknown function
chr01	18135534	TSC	G	A		89	36	55	75	4.66531e-06	0.0003	PGSC0003DMG400046731	37195300..37201700	Gene of unknown function
chr01	18135571	TSC	T	A		49	29	27	54	0.000250786	0.00581	PGSC0003DMG400046731	37195300..37201700	Gene of unknown function
chr01	18135595	TSC	G	A		43	15	23	28	0.00304576	0.03493	PGSC0003DMG400046731	37195300..37201700	Gene of unknown function
chr01	18136615	TY	C	T		176	8	189	35	0.000165416	0.00566	PGSC0003DMG400046731	37195300..37201700	Gene of unknown function
chr01	18136615	TSY	C	T		140	7	171	39	8.78901e-05	0.00745	PGSC0003DMG400046731	37195300..37201700	Gene of unknown function
chr01	18136704	TSY	C	T		198	30	185	62	0.00109741	0.03798	PGSC0003DMG400046731	37195300..37201700	Gene of unknown function
chr01	18138246	TY	G	C		181	8	189	41	1.16673e-05	0.00083	PGSC0003DMG400046731	37195300..37201700	Gene of unknown function
chr01	18359859	TSC	T	C	V/A	171	72	117	111	2.97141e-05	0.0012	PGSC0003DMG400036828	37419200..37420330	Conserved gene of unknown function
chr01	18359860	TSC	G	A		167	78	200	28	2.93834e-07	4e-05	PGSC0003DMG400036828	37419200..37420330	Conserved gene of unknown function
chr01	18359860	TSY	G	A		129	59	161	28	0.00014309	0.01022	PGSC0003DMG400036828	37419200..37420330	Conserved gene of unknown function
chr01	18360007	TSC	A	C		33	9	22	30	0.000659423	0.01171	PGSC0003DMG400036828	37419200..37420330	Conserved gene of unknown function
chr01	18552464	TSC	A	T		192	4	154	18	0.000710597	0.01236	PGSC0003DMG400015966	37611830..37615210	Pentatricopeptide repeat-containing protein
chr01	18552478	TY	T	A		26	164	10	239	0.000340228	0.00941	PGSC0003DMG400015966	37611830..37615210	Pentatricopeptide repeat-containing protein
chr01	18552478	TSY	T	A		31	145	8	218	2.26931e-06	0.00062	PGSC0003DMG400015966	37611830..37615210	Pentatricopeptide repeat-containing protein
chr01	18552517	TSY	T	A		22	108	6	163	9.65046e-05	0.00795	PGSC0003DMG400015966	37611830..37615210	Pentatricopeptide repeat-containing protein
chr01	18552520	TSC	A	G		130	36	88	78	1.77809e-06	0.00014	PGSC0003DMG400015966	37611830..37615210	Pentatricopeptide repeat-containing protein
chr01	18552568	TSY	A	T		126	5	137	27	0.000518998	0.02361	PGSC0003DMG400015966	37611830..37615210	Pentatricopeptide repeat-containing protein
chr01	18606591	TSC	C	A		194	35	153	8	0.00154583	0.02161	PGSC0003DMG400029061	37666200..37672500	O-acetyltransferase
chr01	18606717	TSC	T	A	L/F	185	18	203	4	0.00183773	0.02447	PGSC0003DMG400029061	37666200..37672500	O-acetyltransferase
chr01	18607943	TSC	A	G	F/L	45	158	21	177	0.0019114	0.02517	PGSC0003DMG400029061	37666200..37672500	O-acetyltransferase
chr01	18607943	TSY	A	G	F/L	42	117	19	201	4.35522e-06	0.00098	PGSC0003DMG400029061	37666200..37672500	O-acetyltransferase
chr01	18607978	TSC	C	T	R/H	132	29	99	59	0.000154259	0.00407	PGSC0003DMG400029061	37666200..37672500	O-acetyltransferase
chr01	18608432	TSC	G	T		80	50	86	17	0.000250256	0.0058	PGSC0003DMG400029061	37666200..37672500	O-acetyltransferase
chr01	43408970	TY	G	A		0	32	18	34	5.88884e-05	0.00271	PGSC0003DMG400047177	39840220..39843000	Gene of unknown function
chr01	43409195	TSC	A	T		160	12	135	41	2.15605e-05	0.00094	PGSC0003DMG400047177	39840220..39843000	Gene of unknown function
chr01	48080631	TSC	C	G		179	18	134	50	4.12816e-06	0.00027	PGSC0003DMG400009830	43576810..43581640	Ureide permease
chr01	48080672	TSC	A	C		90	72	49	94	0.000224579	0.00536	PGSC0003DMG400009830	43576810..43581640	Ureide permease
chr01	48080673	TSC	T	A		85	73	49	94	0.000757622	0.01294	PGSC0003DMG400009830	43576810..43581640	Ureide permease
chr01	48080725	TSC	G	A		146	47	115	72	0.00393142	0.04176	PGSC0003DMG400009830	43576810..43581640	Ureide permease
chr01	48080725	TSY	G	A		104	40	99	88	0.000406995	0.02025	PGSC0003DMG400009830	43576810..43581640	Ureide permease
chr01	27800796	TSC	C	G		161	85	209	32	4.2878e-08	1e-05	PGSC0003DMG400014989	44190300..44195700	Importin alpha 2
chr01	27800797	TSC	C	A		216	32	231	10	0.000584267	0.01074	PGSC0003DMG400014989	44190300..44195700	Importin alpha 2
chr01	27294643	TSC	G	A		143	3	93	11	0.00493446	0.04901	PGSC0003DMG400026695	44699970..44702610	GTPase
chr01	27294859	TY	A	G		180	61	144	106	8.84251e-05	0.00362	PGSC0003DMG400026695	44699970..44702610	GTPase
chr01	27294955	TSC	T	G		96	42	105	6	2.61158e-07	3e-05	PGSC0003DMG400026695	44699970..44702610	GTPase
chr01	27294961	TSC	G	C		85	35	99	6	3.72149e-06	0.00025	PGSC0003DMG400026695	44699970..44702610	GTPase
chr01	38103250	TSY	T	C	M/V	55	13	37	34	0.000356982	0.01859	PGSC0003DMG400044027	45237470..45240230	Gene of unknown function
chr01	38103494	TSC	C	T		160	50	130	82	0.001121	0.01713	PGSC0003DMG400044027	45237470..45240230	Gene of unknown function
chr01	38103533	TSY	C	T		88	35	128	5	2.47402e-08	2e-05	PGSC0003DMG400044027	45237470..45240230	Gene of unknown function
chr01	38103570	TSC	G	A	P/L	52	29	43	6	0.00397906	0.04212	PGSC0003DMG400044027	45237470..45240230	Gene of unknown function
chr01	38714722	TSC	G	A	T/M	96	46	110	20	0.00112731	0.0172	PGSC0003DMG400034579	45848707..45849041	Gene of unknown function
chr01	38714753	TSC	C	T	A/T	202	8	187	24	0.00507422	0.04997	PGSC0003DMG400034579	45848707..45849041	Gene of unknown function
chr01	38714770	TSC	C	T	S/N	136	68	172	28	4.61087e-06	0.0003	PGSC0003DMG400034579	45848707..45849041	Gene of unknown function
chr01	38714778	TSC	A	G		127	74	147	45	0.00431599	0.04459	PGSC0003DMG400034579	45848707..45849041	Gene of unknown function
chr01	38714789	TSC	C	A	A/S	127	61	154	27	8.4595e-05	0.00261	PGSC0003DMG400034579	45848707..45849041	Gene of unknown function
chr01	49773719	TSY	A	G	Y/C	16	71	1	94	4.17219e-05	0.00453	PGSC0003DMG400001207	46248400..46254600	Zinc finger protein
chr01	49773749	TY	T	G	L/W	26	181	6	242	2.66554e-05	0.00152	PGSC0003DMG400001207	46248400..46254600	Zinc finger protein
chr01	49773749	TSY	T	G	L/W	26	150	1	209	7.4285e-09	1e-05	PGSC0003DMG400001207	46248400..46254600	Zinc finger protein
chr01	49773767	TY	A	G	Q/R	72	122	45	196	2.01937e-05	0.00125	PGSC0003DMG400001207	46248400..46254600	Zinc finger protein
chr01	49773767	TSY	A	G	Q/R	54	110	19	178	4.09976e-08	4e-05	PGSC0003DMG400001207	46248400..46254600	Zinc finger protein
chr01	49773823	TSY	A	G	I/V	29	134	14	195	0.00103482	0.03662	PGSC0003DMG400001207	46248400..46254600	Zinc finger protein
chr01	49773897	TSC	C	T		185	13	148	46	1.90543e-06	0.00015	PGSC0003DMG400001207	46248400..46254600	Zinc finger protein
chr01	49773936	TY	G	C		18	84	4	108	0.00112839	0.02161	PGSC0003DMG400001207	46248400..46254600	Zinc finger protein
chr01	49773936	TSY	G	C		21	78	6	99	0.00154738	0.0472	PGSC0003DMG400001207	46248400..46254600	Zinc finger protein
chr01	49844939	TSC	G	C		209	4	164	26	4.66808e-06	0.0003	PGSC0003DMG400001205	46314900..46324400	Conserved gene of unknown function
chr01	49844939	TSY	G	C		154	3	185	23	0.000698651	0.02858	PGSC0003DMG400001205	46314900..46324400	Conserved gene of unknown function
chr01	49844944	TSC	A	G		199	21	187	3	0.000504606	0.00967	PGSC0003DMG400001205	46314900..46324400	Conserved gene of unknown function
chr01	49844965	TY	G	A		48	146	31	216	0.0011022	0.02126	PGSC0003DMG400001205	46314900..46324400	Conserved gene of unknown function
chr01	49844965	TSY	G	A		54	129	30	210	2.32609e-05	0.00307	PGSC0003DMG400001205	46314900..46324400	Conserved gene of unknown function
chr01	32126483	TSC	G	T	V/F	82	4	64	36	7.38376e-08	1e-05	PGSC0003DMG400021972	46640300..46646400	Gene of unknown function
chr01	32126483	TSY	G	T	V/F	71	5	80	44	1.39268e-06	0.00045	PGSC0003DMG400021972	46640300..46646400	Gene of unknown function
chr01	32126632	TSY	A	G		34	123	12	163	0.000107822	0.00852	PGSC0003DMG400021972	46640300..46646400	Gene of unknown function
chr01	31846635	TY	T	C		25	40	15	79	0.00162232	0.02777	PGSC0003DMG400036070	46975620..46978180	Gene of unknown function
chr01	31846635	TSY	T	C		32	40	7	67	1.66737e-06	0.00051	PGSC0003DMG400036070	46975620..46978180	Gene of unknown function
chr01	31846645	TSY	T	C	F/L	30	37	8	60	2.03652e-05	0.00281	PGSC0003DMG400036070	46975620..46978180	Gene of unknown function
chr01	31846646	TSY	T	C	F/S	31	37	8	60	2.03652e-05	0.00281	PGSC0003DMG400036070	46975620..46978180	Gene of unknown function
chr01	31846651	TSY	A	G	I/V	28	35	8	58	6.22149e-05	0.00594	PGSC0003DMG400036070	46975620..46978180	Gene of unknown function
chr01	31846843	TSC	C	T	P/S	77	14	51	38	6.62296e-05	0.00218	PGSC0003DMG400036070	46975620..46978180	Gene of unknown function
chr01	31598712	TY	C	A		13	47	4	79	0.00319352	0.04397	PGSC0003DMG400042252	47162600..47171300	Gene of unknown function
chr01	31598712	TSY	C	A		13	33	4	65	0.00123549	0.04096	PGSC0003DMG400042252	47162600..47171300	Gene of unknown function
chr01	31598774	TSY	T	C		21	65	6	117	4.48688e-05	0.00476	PGSC0003DMG400042252	47162600..47171300	Gene of unknown function
chr01	31598844	TSY	C	T		131	18	160	55	0.00141336	0.04459	PGSC0003DMG400042252	47162600..47171300	Gene of unknown function
chr01	31598937	TSC	A	G		40	69	8	111	2.59832e-08	1e-05	PGSC0003DMG400042252	47162600..47171300	Gene of unknown function
chr01	31598937	TSY	A	G		27	62	11	103	0.000236717	0.01421	PGSC0003DMG400042252	47162600..47171300	Gene of unknown function
chr01	31598948	TSC	A	G		28	83	6	119	9.47485e-06	0.00051	PGSC0003DMG400042252	47162600..47171300	Gene of unknown function
chr01	31598948	TSY	A	G		17	74	2	112	3.42516e-05	0.00396	PGSC0003DMG400042252	47162600..47171300	Gene of unknown function
chr01	31599841	TSY	A	G		24	52	10	87	0.000853927	0.03245	PGSC0003DMG400042252	47162600..47171300	Gene of unknown function
chr01	31599891	TY	G	A	R/C	25	154	8	197	0.000461444	0.01164	PGSC0003DMG400042252	47162600..47171300	Gene of unknown function
chr01	31599891	TSY	G	A	R/C	35	98	5	170	7.24572e-10	0	PGSC0003DMG400042252	47162600..47171300	Gene of unknown function
chr01	31599953	TY	T	C	Q/R	33	120	13	144	0.00124097	0.02307	PGSC0003DMG400042252	47162600..47171300	Gene of unknown function
chr01	31599953	TSY	T	C	Q/R	44	78	14	125	5.0542e-07	0.00022	PGSC0003DMG400042252	47162600..47171300	Gene of unknown function
chr01	31599973	TY	C	A	K/N	113	14	112	39	0.00202906	0.03231	PGSC0003DMG400042252	47162600..47171300	Gene of unknown function
chr01	31599986	TY	C	T	C/Y	120	15	121	42	0.00173096	0.02903	PGSC0003DMG400042252	47162600..47171300	Gene of unknown function
chr01	31600012	TSY	G	C		122	16	122	52	9.69843e-05	0.00796	PGSC0003DMG400042252	47162600..47171300	Gene of unknown function
chr01	31600038	TY	C	T		106	31	185	13	2.7153e-05	0.00154	PGSC0003DMG400042252	47162600..47171300	Gene of unknown function
chr01	31605015	TSC	G	T		176	41	116	71	2.16935e-05	0.00095	PGSC0003DMG400042252	47162600..47171300	Gene of unknown function
chr01	36913206	TSC	C	T		130	58	79	102	7.78842e-07	8e-05	PGSC0003DMG400017979	49848200..49853800	Ulp1 protease family, C-terminal catalytic domain containing protein
chr01	36913281	TY	G	T		141	36	139	88	8.35193e-05	0.00347	PGSC0003DMG400017979	49848200..49853800	Ulp1 protease family, C-terminal catalytic domain containing protein
chr01	36913282	TY	T	C		9	175	1	247	0.00258138	0.03807	PGSC0003DMG400017979	49848200..49853800	Ulp1 protease family, C-terminal catalytic domain containing protein
chr01	36000437	TSC	G	A		27	125	48	63	8.23974e-06	0.00046	PGSC0003DMG400005302	50763400..50768800	Gene of unknown function
chr01	36000440	TSC	G	A		99	44	93	7	4.61815e-06	0.0003	PGSC0003DMG400005302	50763400..50768800	Gene of unknown function
chr01	36001747	TY	A	G		149	69	189	46	0.00353052	0.04703	PGSC0003DMG400005302	50763400..50768800	Gene of unknown function
chr01	36001865	TSC	G	A		94	8	41	16	0.00103439	0.01617	PGSC0003DMG400005302	50763400..50768800	Gene of unknown function
chr01	32748452	TSC	A	T	V/D	38	34	49	14	0.00372586	0.04024	PGSC0003DMG400041814	51197290..51200340	Gene of unknown function
chr01	32748467	TSC	C	T	S/N	126	9	86	30	3.77249e-05	0.00144	PGSC0003DMG400041814	51197290..51200340	Gene of unknown function
chr01	32748484	TSC	C	T		75	79	115	27	7.70066e-09	0	PGSC0003DMG400041814	51197290..51200340	Gene of unknown function
chr01	32748489	TSC	C	T	G/S	83	70	111	25	7.90792e-07	8e-05	PGSC0003DMG400041814	51197290..51200340	Gene of unknown function
chr01	32748512	TSC	G	A	T/I	121	12	94	28	0.00307291	0.03516	PGSC0003DMG400041814	51197290..51200340	Gene of unknown function
chr01	32748682	TY	A	G		12	38	3	65	0.00204622	0.03251	PGSC0003DMG400041814	51197290..51200340	Gene of unknown function
chr01	41059069	TSC	T	C		141	108	106	140	0.00300253	0.03459	PGSC0003DMG400039815	52260700..52270300	Gene of unknown function
chr01	41062545	TSC	G	A		163	40	179	10	1.53349e-05	0.00073	PGSC0003DMG400039815	52260700..52270300	Gene of unknown function
chr01	41062570	TSC	C	T		162	39	160	8	1.67162e-05	0.00078	PGSC0003DMG400039815	52260700..52270300	Gene of unknown function
chr01	41062589	TSC	G	A		118	127	176	65	2.21013e-08	1e-05	PGSC0003DMG400039815	52260700..52270300	Gene of unknown function
chr01	41062624	TSC	G	A		118	124	170	74	3.58719e-06	0.00024	PGSC0003DMG400039815	52260700..52270300	Gene of unknown function
chr01	41062701	TSC	C	A		159	32	165	7	7.28495e-05	0.00234	PGSC0003DMG400039815	52260700..52270300	Gene of unknown function
chr01	41699301	TY	G	C	S/T	0	14	23	6	4.9452e-07	8e-05	PGSC0003DMG400041506	53034350..53035160	Gene of unknown function
chr01	41699301	TSY	G	C	S/T	0	14	23	6	4.9452e-07	0.00021	PGSC0003DMG400041506	53034350..53035160	Gene of unknown function
chr01	41699329	TY	T	A		0	12	23	5	1.1076e-06	0.00015	PGSC0003DMG400041506	53034350..53035160	Gene of unknown function
chr01	41699329	TSY	T	A		0	12	23	5	1.1076e-06	0.00038	PGSC0003DMG400041506	53034350..53035160	Gene of unknown function
chr01	42370655	TSC	A	C		0	68	12	30	3.1439e-06	0.00022	PGSC0003DMG402004220	53703500..53710500	Short-chain dehydrogenase
chr01	29018662	TY	C	T	A/V	135	6	164	31	0.000656149	0.01487	PGSC0003DMG400030221	56714400..56724400	Integrase core domain containing protein
chr01	29018697	TY	A	T		144	18	177	54	0.00218483	0.03403	PGSC0003DMG400030221	56714400..56724400	Integrase core domain containing protein
chr01	29019631	TY	C	T		45	13	110	5	0.000861276	0.01794	PGSC0003DMG400030221	56714400..56724400	Integrase core domain containing protein
chr01	29019631	TSY	C	T		26	13	89	5	6.23787e-05	0.00595	PGSC0003DMG400030221	56714400..56724400	Integrase core domain containing protein
chr01	29020298	TSC	C	T	L/F	85	29	120	4	3.86539e-07	5e-05	PGSC0003DMG400030221	56714400..56724400	Integrase core domain containing protein
chr01	29020402	TSC	A	G		80	39	103	10	9.12011e-06	0.00049	PGSC0003DMG400030221	56714400..56724400	Integrase core domain containing protein
chr01	29024902	TY	C	T		89	15	93	42	0.00342785	0.04613	PGSC0003DMG400030221	56714400..56724400	Integrase core domain containing protein
chr01	50194219	TSC	T	C		45	44	17	62	0.000113271	0.00324	PGSC0003DMG400042127	57088360..57091280	Serine-threonine protein kinase, plant-type	signaling, regulation
chr01	50194229	TSC	C	T		53	33	18	58	1.48499e-06	0.00013	PGSC0003DMG400042127	57088360..57091280	Serine-threonine protein kinase, plant-type
chr01	50194234	TSC	C	T		52	32	17	58	5.92688e-07	6e-05	PGSC0003DMG400042127	57088360..57091280	Serine-threonine protein kinase, plant-type
chr01	50194238	TSC	C	T		52	32	16	57	4.45965e-07	5e-05	PGSC0003DMG400042127	57088360..57091280	Serine-threonine protein kinase, plant-type
chr01	50389719	TSC	G	A		155	95	196	52	3.47462e-05	0.00135	PGSC0003DMG400011326	57283290..57284880	Ring finger protein
chr01	50389719	TSY	G	A		176	74	140	109	0.00114428	0.03901	PGSC0003DMG400011326	57283290..57284880	Ring finger protein
chr01	50389770	TSC	T	C		165	60	198	30	0.000379805	0.00786	PGSC0003DMG400011326	57283290..57284880	Ring finger protein
chr01	50389770	TY	T	C		186	40	153	75	0.000230099	0.00713	PGSC0003DMG400011326	57283290..57284880	Ring finger protein
chr01	50389770	TSY	T	C		176	50	144	83	0.000929461	0.03414	PGSC0003DMG400011326	57283290..57284880	Ring finger protein
chr01	50389829	TSC	C	T	A/T	150	46	97	102	1.50518e-08	0	PGSC0003DMG400011326	57283290..57284880	Ring finger protein
chr01	50761123	TSC	C	A		198	48	160	87	0.000115701	0.00329	PGSC0003DMG400042836	57654390..57656670	Gene of unknown function		7	1
chr01	50761129	TSC	G	A		203	43	160	88	6.47478e-06	0.00038	PGSC0003DMG400042836	57654390..57656670	Gene of unknown function		7	1
chr01	50761158	TSC	C	T		180	53	147	88	0.00060165	0.01097	PGSC0003DMG400042836	57654390..57656670	Gene of unknown function		7	1
chr01	50761209	TSC	T	C		78	65	55	113	0.000140765	0.00381	PGSC0003DMG400042836	57654390..57656670	Gene of unknown function		7	1
chr01	50761212	TSC	T	G		88	56	69	99	0.000443954	0.00881	PGSC0003DMG400042836	57654390..57656670	Gene of unknown function		7	1
chr01	50761219	TSC	G	A		104	44	82	96	1.1475e-05	0.00059	PGSC0003DMG400042836	57654390..57656670	Gene of unknown function		7	1
chr01	50761225	TSC	A	G		84	73	64	121	0.000469959	0.00918	PGSC0003DMG400042836	57654390..57656670	Gene of unknown function		7	1
chr01	50761270	TSC	C	T		57	23	50	52	0.00380227	0.04082	PGSC0003DMG400042836	57654390..57656670	Gene of unknown function		7	1
chr01	50854227	TY	G	T		182	36	169	80	0.000104278	0.00407	PGSC0003DMG400011315	57748700..57758100	Eukaryotic translation initiation factor 2 gamma subunit		7	1
chr01	50854227	TSY	G	T		142	29	125	75	9.97568e-06	0.00173	PGSC0003DMG400011315	57748700..57758100	Eukaryotic translation initiation factor 2 gamma subunit		7	1
chr01	50854258	TY	G	A		212	17	199	44	0.000552496	0.0132	PGSC0003DMG400011315	57748700..57758100	Eukaryotic translation initiation factor 2 gamma subunit		7	1
chr01	50854258	TSY	G	A		162	14	158	48	4.40875e-05	0.0047	PGSC0003DMG400011315	57748700..57758100	Eukaryotic translation initiation factor 2 gamma subunit		7	1
chr01	50854387	TSC	C	T		165	29	102	69	6.61861e-08	1e-05	PGSC0003DMG400011315	57748700..57758100	Eukaryotic translation initiation factor 2 gamma subunit		7	1
chr01	50983744	TSC	T	C		16	16	8	39	0.00264494	0.03169	PGSC0003DMG400011341	57877800..57878960	Actin		7	1
chr01	50983814	TSC	C	T		36	17	12	32	9.26512e-05	0.00279	PGSC0003DMG400011341	57877800..57878960	Actin		7	1
chr01	50983930	TSC	C	T	E/K	77	31	53	85	4.0975e-07	5e-05	PGSC0003DMG400011341	57877800..57878960	Actin		7	1
chr01	51151280	TY	C	T		203	44	148	102	1.62137e-08	1e-05	PGSC0003DMG400038072	58043250..58048200	Fatty oxidation complex alpha subunit		7	1
chr01	51151381	TSC	C	G		23	124	1	108	1.78147e-05	0.00082	PGSC0003DMG400038072	58043250..58048200	Fatty oxidation complex alpha subunit		7	1
chr01	51301487	TSC	G	C		126	43	172	11	4.90634e-07	5e-05	PGSC0003DMG400011347	58194300..58196980	Src2 (SOYBEAN GENE REGULATED BY COLD-2)		7	1
chr01	51301640	TSC	C	A		70	25	73	7	0.00304157	0.0349	PGSC0003DMG400011347	58194300..58196980	Src2 (SOYBEAN GENE REGULATED BY COLD-2)		7	1
chr01	51301727	TSC	C	A		39	9	11	16	0.000707209	0.01231	PGSC0003DMG400011347	58194300..58196980	Src2 (SOYBEAN GENE REGULATED BY COLD-2)		7	1
chr01	51301746	TSC	C	T		28	5	8	13	0.000814027	0.01363	PGSC0003DMG400011347	58194300..58196980	Src2 (SOYBEAN GENE REGULATED BY COLD-2)		7	1
chr01	51388701	TSC	C	G	L/F	166	27	209	10	0.000926046	0.01496	PGSC0003DMG400022661	58282560..58286830	Conserved gene of unknown function		7	1
chr01	51391920	TSC	A	G		25	19	4	24	0.00045411	0.00896	PGSC0003DMG400022661	58282560..58286830	Conserved gene of unknown function		7	1
chr01	51391998	TSC	G	A		67	54	101	11	1.96139e-09	0	PGSC0003DMG400022661	58282560..58286830	Conserved gene of unknown function		7	1
chr01	51392137	TSC	C	T		72	50	86	9	1.0744e-07	2e-05	PGSC0003DMG400022661	58282560..58286830	Conserved gene of unknown function		7	1
chr01	51392154	TSC	A	G		68	43	75	6	3.3394e-07	4e-05	PGSC0003DMG400022661	58282560..58286830	Conserved gene of unknown function		7	1
chr01	51770806	TSC	A	G		66	22	17	44	1.60882e-08	0	PGSC0003DMG400022677	58665390..58667490	UPF0497 membrane protein 10		7	1
chr01	51770839	TSC	A	G		60	68	25	65	0.00488184	0.04864	PGSC0003DMG400022677	58665390..58667490	UPF0497 membrane protein 10		7	1
chr01	51770923	TSC	C	T		169	53	97	98	2.78285e-08	1e-05	PGSC0003DMG400022677	58665390..58667490	UPF0497 membrane protein 10		7	1
chr01	51771013	TY	C	T		80	56	165	45	0.000102538	0.00402	PGSC0003DMG400022677	58665390..58667490	UPF0497 membrane protein 10		7	1
chr01	51771013	TSY	C	T		81	53	134	38	0.00105533	0.03706	PGSC0003DMG400022677	58665390..58667490	UPF0497 membrane protein 10		7	1
chr01	51870173	TSC	C	T	V/M	91	34	96	5	5.76195e-06	0.00035	PGSC0003DMG400035235	58763790..58764960	Gene of unknown function		7	1
chr01	51870205	TSC	A	G	L/S	107	56	104	19	0.000377117	0.00782	PGSC0003DMG400035235	58763790..58764960	Gene of unknown function		7	1
chr01	51870246	TSC	C	T		212	35	234	16	0.00480815	0.04813	PGSC0003DMG400035235	58763790..58764960	Gene of unknown function		7	1
chr01	51870282	TSC	T	A	Q/H	180	51	189	14	6.84673e-06	0.0004	PGSC0003DMG400035235	58763790..58764960	Gene of unknown function		7	1
chr01	52050010	TSC	C	A		69	53	82	15	8.38921e-06	0.00047	PGSC0003DMG400022669	58943300..58947430	Cellulose synthase D		7	1
chr01	52050146	TSC	T	C		127	110	91	151	0.000490201	0.00947	PGSC0003DMG400022669	58943300..58947430	Cellulose synthase D		7	1
chr01	52050160	TSC	C	T		136	95	101	134	0.000622499	0.01124	PGSC0003DMG400022669	58943300..58947430	Cellulose synthase D		7	1
chr01	52371834	TSC	T	G		84	104	120	41	2.10322e-08	0	PGSC0003DMG401010667	59266490..59268050	Gene of unknown function	PGSC0003DMG402010667
chr01	52371840	TSC	T	C		167	25	159	6	0.00210772	0.02698	PGSC0003DMG401010667	59266490..59268050	Gene of unknown function	PGSC0003DMG402010667
chr01	53321424	TSC	G	A		85	21	98	5	0.00131369	0.01919	PGSC0003DMG400006289	60201000..60223600	Isoleucyl-tRNA synthetase		8
chr01	53321501	TSC	G	C		138	28	95	62	6.67174e-06	0.00039	PGSC0003DMG400006289	60201000..60223600	Isoleucyl-tRNA synthetase		8
chr01	53324515	TSY	T	C		137	44	205	28	0.00157814	0.04776	PGSC0003DMG400006289	60201000..60223600	Isoleucyl-tRNA synthetase		8
chr01	53324588	TSC	G	C		192	49	121	87	1.08285e-06	0.0001	PGSC0003DMG400006289	60201000..60223600	Isoleucyl-tRNA synthetase		8
chr01	53327228	TSC	A	C		153	84	106	104	0.00293473	0.03403	PGSC0003DMG400006289	60201000..60223600	Isoleucyl-tRNA synthetase		8
chr01	53527855	TSC	C	A	V/F	99	65	49	107	2.21878e-07	3e-05	PGSC0003DMG400006293	60422080..60423310	F-box/kelch-repeat protein		8
chr01	53527861	TY	A	G		135	24	163	7	0.00102243	0.02019	PGSC0003DMG400006293	60422080..60423310	F-box/kelch-repeat protein		8
chr01	53527881	TY	G	A	S/F	153	30	182	8	0.000113673	0.00432	PGSC0003DMG400006293	60422080..60423310	F-box/kelch-repeat protein		8
chr01	53527997	TSC	G	A		29	31	7	51	2.00036e-05	0.00089	PGSC0003DMG400006293	60422080..60423310	F-box/kelch-repeat protein		8
chr01	53528014	TSC	A	T	Y/N	28	16	40	2	0.000365525	0.00765	PGSC0003DMG400006293	60422080..60423310	F-box/kelch-repeat protein		8
chr01	53551936	TSC	G	A		162	42	121	82	1.54025e-05	0.00073	PGSC0003DMG400006295	60441700..60447400	Pentatricopeptide repeat-containing protein		8
chr01	53551937	TSC	G	A		84	125	125	95	0.000707208	0.01231	PGSC0003DMG400006295	60441700..60447400	Pentatricopeptide repeat-containing protein		8
chr01	53551937	TSY	G	A		95	87	68	133	0.000300148	0.01662	PGSC0003DMG400006295	60441700..60447400	Pentatricopeptide repeat-containing protein		8
chr01	53551973	TSC	A	G		119	68	152	41	0.00143962	0.02051	PGSC0003DMG400006295	60441700..60447400	Pentatricopeptide repeat-containing protein		8
chr01	53551977	TSC	T	A		117	66	147	41	0.00284921	0.03334	PGSC0003DMG400006295	60441700..60447400	Pentatricopeptide repeat-containing protein		8
chr01	53552050	TSC	A	G		98	105	103	52	0.000834977	0.01389	PGSC0003DMG400006295	60441700..60447400	Pentatricopeptide repeat-containing protein		8
chr01	53552053	TSC	C	T		118	81	127	37	0.000297815	0.00659	PGSC0003DMG400006295	60441700..60447400	Pentatricopeptide repeat-containing protein		8
chr01	53552071	TSC	A	G		105	121	112	64	0.000624636	0.01127	PGSC0003DMG400006295	60441700..60447400	Pentatricopeptide repeat-containing protein		8
chr01	53552105	TSC	G	A		79	18	35	41	1.9029e-06	0.00015	PGSC0003DMG400006295	60441700..60447400	Pentatricopeptide repeat-containing protein		8
chr01	53552151	TSC	T	C		32	15	16	29	0.00324848	0.03655	PGSC0003DMG400006295	60441700..60447400	Pentatricopeptide repeat-containing protein		8
chr01	53944278	TSC	A	C		60	182	16	168	1.18174e-05	0.0006	PGSC0003DMG400032113	60838390..60839800	Conserved gene of unknown function
chr01	53944278	TY	A	C		18	151	63	184	0.000142855	0.0051	PGSC0003DMG400032113	60838390..60839800	Conserved gene of unknown function
chr01	53944344	TSC	T	G	D/E	195	30	161	65	7.55248e-05	0.0024	PGSC0003DMG400032113	60838390..60839800	Conserved gene of unknown function
chr01	57539688	TSC	T	A	Q/L	42	5	25	16	0.00244657	0.02999	PGSC0003DMG400004355	61147300..61152600	Glutamine synthetase		9	2
chr01	57539748	TSC	C	T	G/D	104	6	78	21	0.000795296	0.0134	PGSC0003DMG400004355	61147300..61152600	Glutamine synthetase		9	2
chr01	57539756	TSC	C	A	L/F	104	8	81	23	0.00184571	0.02455	PGSC0003DMG400004355	61147300..61152600	Glutamine synthetase		9	2
chr01	57539767	TSC	T	C	I/V	10	94	0	98	0.00161349	0.0223	PGSC0003DMG400004355	61147300..61152600	Glutamine synthetase		9	2
chr01	57539811	TY	T	C	N/S	188	36	229	8	2.4286e-06	0.00026	PGSC0003DMG400004355	61147300..61152600	Glutamine synthetase		9	2
chr01	57539847	TY	A	G		158	26	201	6	5.92937e-05	0.00272	PGSC0003DMG400004355	61147300..61152600	Glutamine synthetase		9	2
chr01	57539848	TY	A	G		158	26	201	6	5.92937e-05	0.00272	PGSC0003DMG400004355	61147300..61152600	Glutamine synthetase		9	2
chr01	57539853	TSC	C	A		155	14	117	37	0.000114593	0.00327	PGSC0003DMG400004355	61147300..61152600	Glutamine synthetase		9	2
chr01	57539853	TSY	C	A		144	7	138	37	7.87141e-06	0.00146	PGSC0003DMG400004355	61147300..61152600	Glutamine synthetase		9	2
chr01	57539934	TSY	G	A		31	54	83	53	0.000515234	0.02352	PGSC0003DMG400004355	61147300..61152600	Glutamine synthetase		9	2
chr01	57563865	TSC	T	C		133	54	94	79	0.00106099	0.01647	PGSC0003DMG400004348	61168100..61185800	Conserved gene of unknown function		9	2
chr01	57563865	TSY	T	C		102	26	84	93	8.65529e-09	1e-05	PGSC0003DMG400004348	61168100..61185800	Conserved gene of unknown function		9	2
chr01	57564524	TSC	C	G		198	51	181	17	0.000512353	0.00978	PGSC0003DMG400004348	61168100..61185800	Conserved gene of unknown function		9	2
chr01	57564524	TY	C	G		159	21	192	57	0.00337525	0.04563	PGSC0003DMG400004348	61168100..61185800	Conserved gene of unknown function		9	2
chr01	57565778	TY	T	A		141	25	190	4	6.55728e-06	0.00054	PGSC0003DMG400004348	61168100..61185800	Conserved gene of unknown function		9	2
chr01	57565880	TSC	T	A		93	85	120	26	1.18789e-08	0	PGSC0003DMG400004348	61168100..61185800	Conserved gene of unknown function		9	2
chr01	57565890	TSC	C	T		88	98	112	43	3.30815e-06	0.00023	PGSC0003DMG400004348	61168100..61185800	Conserved gene of unknown function		9	2
chr01	57565904	TSC	G	C		89	96	99	46	0.00032299	0.00699	PGSC0003DMG400004348	61168100..61185800	Conserved gene of unknown function		9	2
chr01	57565913	TY	C	T		138	20	219	10	0.00347411	0.04653	PGSC0003DMG400004348	61168100..61185800	Conserved gene of unknown function		9	2
chr01	57715085	TY	C	T		50	4	69	27	0.00285409	0.04078	PGSC0003DMG400033114	61326000..61336000	Hydroxymethylglutaryl-CoA lyase		9	2
chr01	57715086	TSC	C	T		48	44	7	37	6.68342e-05	0.00219	PGSC0003DMG400033114	61326000..61336000	Hydroxymethylglutaryl-CoA lyase		9	2
chr01	57715086	TY	C	T		4	50	35	63	8.13418e-05	0.00341	PGSC0003DMG400033114	61326000..61336000	Hydroxymethylglutaryl-CoA lyase		9	2
chr01	57715088	TSC	G	A		47	44	7	37	6.71203e-05	0.0022	PGSC0003DMG400033114	61326000..61336000	Hydroxymethylglutaryl-CoA lyase		9	2
chr01	57715088	TY	G	A		4	50	35	62	7.69748e-05	0.00327	PGSC0003DMG400033114	61326000..61336000	Hydroxymethylglutaryl-CoA lyase		9	2
chr01	57715126	TSC	C	T	G/S	66	46	49	4	4.34198e-06	0.00028	PGSC0003DMG400033114	61326000..61336000	Hydroxymethylglutaryl-CoA lyase		9	2
chr01	57715158	TSC	C	T	G/D	70	44	10	37	4.34082e-06	0.00028	PGSC0003DMG400033114	61326000..61336000	Hydroxymethylglutaryl-CoA lyase		9	2
chr01	57715158	TY	C	T	G/D	8	55	45	87	0.0017775	0.02956	PGSC0003DMG400033114	61326000..61336000	Hydroxymethylglutaryl-CoA lyase		9	2
chr01	57715161	TSC	G	A	S/L	69	43	9	37	1.45711e-06	0.00012	PGSC0003DMG400033114	61326000..61336000	Hydroxymethylglutaryl-CoA lyase		9	2
chr01	57715233	TSC	G	A	S/L	26	17	2	19	0.000117329	0.00333	PGSC0003DMG400033114	61326000..61336000	Hydroxymethylglutaryl-CoA lyase		9	2
chr01	57723328	TSC	C	T		30	13	8	18	0.00253289	0.03074	PGSC0003DMG400033114	61326000..61336000	Hydroxymethylglutaryl-CoA lyase		9	2
chr01	57723334	TY	A	G		4	22	27	14	5.48966e-05	0.00258	PGSC0003DMG400033114	61326000..61336000	Hydroxymethylglutaryl-CoA lyase		9	2
chr01	57723334	TSY	A	G		2	24	26	14	2.67934e-06	0.0007	PGSC0003DMG400033114	61326000..61336000	Hydroxymethylglutaryl-CoA lyase		9	2
chr01	57723374	TY	C	T		12	13	38	2	2.04355e-05	0.00126	PGSC0003DMG400033114	61326000..61336000	Hydroxymethylglutaryl-CoA lyase		9	2
chr01	56581531	TSC	C	T	G/S	138	25	78	43	0.000125503	0.0035	PGSC0003DMG400008980	61792000..61793530	Basic 7S globulin 2 small subunit			2
chr01	56581574	TSC	G	A		213	37	120	70	1.71014e-07	2e-05	PGSC0003DMG400008980	61792000..61793530	Basic 7S globulin 2 small subunit			2
chr01	56581586	TSC	C	T		197	51	127	86	3.92355e-06	0.00026	PGSC0003DMG400008980	61792000..61793530	Basic 7S globulin 2 small subunit			2
chr01	56581589	TSC	A	G		170	79	114	101	0.000837969	0.01393	PGSC0003DMG400008980	61792000..61793530	Basic 7S globulin 2 small subunit			2
chr01	56581589	TSY	A	G		166	59	136	106	7.20635e-05	0.00652	PGSC0003DMG400008980	61792000..61793530	Basic 7S globulin 2 small subunit			2
chr01	56581604	TSC	A	G		57	187	18	183	4.23186e-05	0.00157	PGSC0003DMG400008980	61792000..61793530	Basic 7S globulin 2 small subunit			2
chr01	56581604	TSY	A	G		62	143	39	205	0.000407779	0.02027	PGSC0003DMG400008980	61792000..61793530	Basic 7S globulin 2 small subunit			2
chr01	56581618	TY	T	G	I/L	169	68	138	110	0.000473229	0.01184	PGSC0003DMG400008980	61792000..61793530	Basic 7S globulin 2 small subunit			2
chr01	56330100	TSY	G	A		63	49	152	52	0.00105281	0.03701	PGSC0003DMG400008990	62042070..62045300	Conserved gene of unknown function		10	2
chr01	56330179	TSC	A	C		205	35	167	75	2.02321e-05	0.0009	PGSC0003DMG400008990	62042070..62045300	Conserved gene of unknown function		10	2
chr01	56330179	TSY	A	C		205	22	186	61	1.84814e-05	0.00261	PGSC0003DMG400008990	62042070..62045300	Conserved gene of unknown function		10	2
chr01	56330207	TSC	C	T	R/K	222	28	174	75	1.49862e-07	2e-05	PGSC0003DMG400008990	62042070..62045300	Conserved gene of unknown function		10	2
chr01	56330207	TSY	C	T	R/K	227	23	190	60	1.15999e-05	0.00191	PGSC0003DMG400008990	62042070..62045300	Conserved gene of unknown function		10	2
chr01	56321344	TSC	C	T		40	78	52	39	0.00117372	0.01771	PGSC0003DMG400038631	62052690..62053680	chromo' domain containing protein (chromatin organization modifier)		10	2
chr01	56321344	TSY	C	T		21	67	65	73	0.000450128	0.02161	PGSC0003DMG400038631	62052690..62053680	chromo' domain containing protein (chromatin organization modifier)		10	2
chr01	56321369	TSC	C	T		22	73	47	35	5.78988e-06	0.00035	PGSC0003DMG400038631	62052690..62053680	chromo' domain containing protein (chromatin organization modifier)		10	2
chr01	56246580	TSC	A	T		38	4	18	14	0.000939992	0.01511	PGSC0003DMG400009025	62120500..62130300	E3 ubiquitin-protein ligase RHF1A		10	2
chr01	56246648	TSC	C	T		120	12	89	30	0.000683042	0.01201	PGSC0003DMG400009025	62120500..62130300	E3 ubiquitin-protein ligase RHF1A		10	2
chr01	56246650	TSC	C	T	T/I	126	12	90	30	0.000596913	0.01091	PGSC0003DMG400009025	62120500..62130300	E3 ubiquitin-protein ligase RHF1A		10	2
chr01	56246762	TSC	A	G		199	25	161	58	4.87613e-05	0.00174	PGSC0003DMG400009025	62120500..62130300	E3 ubiquitin-protein ligase RHF1A		10	2
chr01	56246816	TSC	G	A		196	26	134	44	0.000864641	0.01424	PGSC0003DMG400009025	62120500..62130300	E3 ubiquitin-protein ligase RHF1A		10	2
chr01	56246843	TY	T	C		139	104	177	71	0.00132687	0.02417	PGSC0003DMG400009025	62120500..62130300	E3 ubiquitin-protein ligase RHF1A		10	2
chr01	56246843	TSY	T	C		123	108	187	59	1.95726e-07	0.00011	PGSC0003DMG400009025	62120500..62130300	E3 ubiquitin-protein ligase RHF1A		10	2
chr01	56123046	TY	C	T		14	135	63	159	6.85019e-06	0.00056	PGSC0003DMG400008998	62236900..62251600	Kinase-associated protein phosphatase 1		10	2
chr01	55984268	TSC	A	G		199	17	143	46	7.38423e-06	0.00042	PGSC0003DMG400009003	62388700..62394500	Conserved gene of unknown function		10	2
chr01	55984321	TSC	C	T		172	19	129	40	0.000555386	0.01035	PGSC0003DMG400009003	62388700..62394500	Conserved gene of unknown function		10	2
chr01	55984327	TSC	A	T		171	19	131	38	0.0014014	0.02013	PGSC0003DMG400009003	62388700..62394500	Conserved gene of unknown function		10	2
chr01	55927980	TSC	G	A		93	9	60	20	0.00402098	0.04243	PGSC0003DMG400009004	62441400..62448600	Chaperone protein dnaJ		10	2
chr01	55928032	TY	A	G		0	183	22	227	5.25732e-06	0.00046	PGSC0003DMG400009004	62441400..62448600	Chaperone protein dnaJ		10	2
chr01	55928132	TSC	T	C		14	135	0	132	0.000120146	0.00338	PGSC0003DMG400009004	62441400..62448600	Chaperone protein dnaJ		10	2
chr01	55928132	TY	T	C		0	147	19	144	3.28889e-06	0.00033	PGSC0003DMG400009004	62441400..62448600	Chaperone protein dnaJ		10	2
chr01	55928196	TSC	T	C		19	144	1	113	0.000290379	0.00647	PGSC0003DMG400009004	62441400..62448600	Chaperone protein dnaJ		10	2
chr01	55928196	TY	T	C		0	137	23	169	2.72882e-06	0.00028	PGSC0003DMG400009004	62441400..62448600	Chaperone protein dnaJ		10	2
chr01	55929227	TSC	A	G		101	31	111	12	0.00417851	0.04359	PGSC0003DMG400009004	62441400..62448600	Chaperone protein dnaJ		10	2
chr01	55929337	TSC	G	A		184	54	227	20	7.66349e-06	0.00043	PGSC0003DMG400009004	62441400..62448600	Chaperone protein dnaJ		10	2
chr01	55929344	TSC	T	A		159	52	192	19	2.39592e-05	0.00102	PGSC0003DMG400009004	62441400..62448600	Chaperone protein dnaJ		10	2
chr01	55929350	TSC	A	G		180	22	154	51	0.000267493	0.00609	PGSC0003DMG400009004	62441400..62448600	Chaperone protein dnaJ		10	2
chr01	55929384	TSC	T	C		79	28	112	7	3.06943e-05	0.00123	PGSC0003DMG400009004	62441400..62448600	Chaperone protein dnaJ		10	2
chr01	55929387	TSC	G	A		93	10	88	31	0.00176832	0.02382	PGSC0003DMG400009004	62441400..62448600	Chaperone protein dnaJ		10	2
chr01	55911598	TSY	T	C		124	21	171	77	0.000262371	0.0152	PGSC0003DMG400009034	62459600..62466800	Conserved gene of unknown function		10	2
chr01	55911600	TSY	T	C		121	21	170	79	0.000180764	0.01194	PGSC0003DMG400009034	62459600..62466800	Conserved gene of unknown function		10	2
chr01	55913137	TY	G	A		0	46	20	60	6.17961e-05	0.00281	PGSC0003DMG400009034	62459600..62466800	Conserved gene of unknown function		10	2
chr01	55913137	TSY	G	A		1	33	20	41	0.000559016	0.02477	PGSC0003DMG400009034	62459600..62466800	Conserved gene of unknown function		10	2
chr01	55913150	TY	A	G		2	55	24	79	0.00069367	0.01544	PGSC0003DMG400009034	62459600..62466800	Conserved gene of unknown function		10	2
chr01	55913150	TSY	A	G		3	44	24	55	0.00140997	0.04453	PGSC0003DMG400009034	62459600..62466800	Conserved gene of unknown function		10	2
chr01	55913177	TSC	A	T		25	86	5	79	0.00128553	0.01889	PGSC0003DMG400009034	62459600..62466800	Conserved gene of unknown function		10	2
chr01	55913177	TY	A	T		3	80	39	120	1.28022e-05	0.00089	PGSC0003DMG400009034	62459600..62466800	Conserved gene of unknown function		10	2
chr01	55913177	TSY	A	T		6	63	37	90	0.000973401	0.03516	PGSC0003DMG400009034	62459600..62466800	Conserved gene of unknown function		10	2
chr01	55913180	TSC	G	T		25	89	6	84	0.00287283	0.03352	PGSC0003DMG400009034	62459600..62466800	Conserved gene of unknown function		10	2
chr01	55913180	TY	G	T		4	80	39	124	7.66629e-05	0.00326	PGSC0003DMG400009034	62459600..62466800	Conserved gene of unknown function		10	2
chr01	55913180	TSY	G	T		7	67	38	94	0.00136665	0.04361	PGSC0003DMG400009034	62459600..62466800	Conserved gene of unknown function		10	2
chr01	55913202	TY	C	T		8	97	44	135	0.000239641	0.00734	PGSC0003DMG400009034	62459600..62466800	Conserved gene of unknown function		10	2
chr01	55913218	TSC	G	A		86	61	32	55	0.00179736	0.02409	PGSC0003DMG400009034	62459600..62466800	Conserved gene of unknown function		10	2
chr01	55913221	TY	G	A		6	98	41	138	0.000112257	0.00429	PGSC0003DMG400009034	62459600..62466800	Conserved gene of unknown function		10	2
chr01	55913236	TSC	C	T		132	116	51	100	0.000185204	0.00464	PGSC0003DMG400009034	62459600..62466800	Conserved gene of unknown function		10	2
chr01	55913253	TSC	T	C		223	24	192	4	0.00071323	0.01239	PGSC0003DMG400009034	62459600..62466800	Conserved gene of unknown function		10	2
chr01	55913253	TSY	T	C		209	2	203	44	7.73421e-11	0	PGSC0003DMG400009034	62459600..62466800	Conserved gene of unknown function		10	2
chr01	55913282	TY	T	C		13	183	56	173	3.57049e-07	6e-05	PGSC0003DMG400009034	62459600..62466800	Conserved gene of unknown function		10	2
chr01	55913282	TSY	T	C		19	165	72	155	1.11871e-07	7e-05	PGSC0003DMG400009034	62459600..62466800	Conserved gene of unknown function		10	2
chr01	55914356	TY	C	G		2	71	18	83	0.00158398	0.02732	PGSC0003DMG400009034	62459600..62466800	Conserved gene of unknown function		10	2
chr01	55582825	TSC	G	A	E/K	90	56	42	70	0.000155644	0.0041	PGSC0003DMG400037971	62789840..62791420	DELLA protein RGL2		10/11
chr01	55582881	TSC	G	A		209	26	158	59	1.23014e-05	0.00062	PGSC0003DMG400037971	62789840..62791420	DELLA protein RGL2		10/11
chr01	55582943	TY	A	G	D/G	0	125	17	150	5.94482e-05	0.00273	PGSC0003DMG400037971	62789840..62791420	DELLA protein RGL2		10/11
chr01	55532519	TY	T	C		0	56	19	66	5.52885e-05	0.00259	PGSC0003DMG400044792	62839400..62845100	Gene of unknown function		10/11
chr01	55532588	TSC	G	A		101	94	102	46	0.00185146	0.0246	PGSC0003DMG400044792	62839400..62845100	Gene of unknown function		10/11
chr01	55532588	TY	G	A		93	70	195	55	1.00991e-05	0.00074	PGSC0003DMG400044792	62839400..62845100	Gene of unknown function		10/11
chr01	55532588	TSY	G	A		59	83	154	51	4.23583e-10	0	PGSC0003DMG400044792	62839400..62845100	Gene of unknown function		10/11
chr01	55421521	TY	T	C		49	27	90	16	0.00237322	0.03595	PGSC0003DMG400009053	62945600..62952800	RNA binding protein		10/11
chr01	55421644	TY	A	G		174	69	230	19	1.66048e-09	0	PGSC0003DMG400009053	62945600..62952800	RNA binding protein		10/11
chr01	55421644	TSY	A	G		174	67	220	25	8.11423e-07	0.0003	PGSC0003DMG400009053	62945600..62952800	RNA binding protein		10/11
chr01	55426090	TSC	T	C		149	70	98	92	0.000814372	0.01363	PGSC0003DMG400009053	62945600..62952800	RNA binding protein		10/11
chr01	55355836	TY	C	T		0	92	13	147	0.00264658	0.03873	PGSC0003DMG400005217	63010200..63018400	50S ribosomal protein L14		11
chr01	55355920	TY	A	T		0	176	20	217	1.98129e-05	0.00123	PGSC0003DMG400005217	63010200..63018400	50S ribosomal protein L14		11
chr01	55355921	TSC	A	C		12	193	0	171	0.000656319	0.01167	PGSC0003DMG400005217	63010200..63018400	50S ribosomal protein L14		11
chr01	55355921	TY	A	C		0	178	20	222	2.00194e-05	0.00124	PGSC0003DMG400005217	63010200..63018400	50S ribosomal protein L14		11
chr01	55355931	TSC	C	T		177	16	118	44	3.36983e-06	0.00023	PGSC0003DMG400005217	63010200..63018400	50S ribosomal protein L14		11
chr01	55165701	TSC	A	G		212	36	179	65	0.0011419	0.01736	PGSC0003DMG400005212	63207680..63208520	3-5 exonuclease		11
chr01	55165749	TSC	C	T		116	43	66	71	1.51055e-05	0.00072	PGSC0003DMG400005212	63207680..63208520	3-5 exonuclease		11
chr01	55165757	TSC	G	T	Q/K	26	149	3	136	5.74666e-05	0.00196	PGSC0003DMG400005212	63207680..63208520	3-5 exonuclease		11
chr01	55165757	TY	G	T	Q/K	2	130	29	168	2.46368e-05	0.00144	PGSC0003DMG400005212	63207680..63208520	3-5 exonuclease		11
chr01	55152697	TSC	A	T	N/I	20	179	58	186	0.000152513	0.00404	PGSC0003DMG400005198	63220800..63226900	Autophagy 8h		11
chr01	55152709	TSC	G	A	S/N	141	76	208	39	1.84934e-06	0.00015	PGSC0003DMG400005198	63220800..63226900	Autophagy 8h		11
chr01	55152722	TSC	G	T	Q/H	99	141	142	107	0.000578521	0.01067	PGSC0003DMG400005198	63220800..63226900	Autophagy 8h		11
chr01	55152749	TSC	A	G	I/M	75	115	108	74	0.00018019	0.00455	PGSC0003DMG400005198	63220800..63226900	Autophagy 8h		11
chr01	55117750	TSC	T	C		188	34	152	56	0.00425585	0.04413	PGSC0003DMG400005197	63254450..63257870	Cinnamoyl-CoA reductase		11
chr01	55117763	TY	T	C		182	14	206	43	0.00154806	0.02688	PGSC0003DMG400005197	63254450..63257870	Cinnamoyl-CoA reductase		11
chr01	55117763	TSY	T	C		158	11	206	43	0.00105077	0.03697	PGSC0003DMG400005197	63254450..63257870	Cinnamoyl-CoA reductase		11
chr01	55117774	TSY	T	A		118	49	132	116	0.00048738	0.02271	PGSC0003DMG400005197	63254450..63257870	Cinnamoyl-CoA reductase		11
chr01	55117777	TSC	C	G		220	25	182	64	6.55608e-06	0.00039	PGSC0003DMG400005197	63254450..63257870	Cinnamoyl-CoA reductase		11
chr01	55117778	TY	T	C		179	16	202	44	0.00324511	0.04443	PGSC0003DMG400005197	63254450..63257870	Cinnamoyl-CoA reductase		11
chr01	55117789	TSC	T	C		207	23	170	62	3.78486e-06	0.00025	PGSC0003DMG400005197	63254450..63257870	Cinnamoyl-CoA reductase		11
chr01	55117846	TSC	C	T		177	37	201	15	0.00106355	0.01651	PGSC0003DMG400005197	63254450..63257870	Cinnamoyl-CoA reductase		11
chr01	55117909	TSC	G	A		175	21	127	36	0.00372897	0.04026	PGSC0003DMG400005197	63254450..63257870	Cinnamoyl-CoA reductase		11
chr01	55117917	TSC	A	T	Y/F	170	19	118	35	0.00160174	0.02218	PGSC0003DMG400005197	63254450..63257870	Cinnamoyl-CoA reductase		11
chr01	55117966	TY	T	C		0	139	12	165	0.00150461	0.02637	PGSC0003DMG400005197	63254450..63257870	Cinnamoyl-CoA reductase		11
chr01	55103869	TY	T	C		52	108	107	101	0.000305317	0.00871	PGSC0003DMG400005196	63268600..63276200	Ankyrin		11
chr01	55103911	TSC	G	A		144	26	155	5	0.000117141	0.00332	PGSC0003DMG400005196	63268600..63276200	Ankyrin		11
chr01	55103938	TSC	T	A		176	18	121	64	1.91081e-09	0	PGSC0003DMG400005196	63268600..63276200	Ankyrin		11
chr01	55104016	TSC	A	G		112	9	57	34	9.17677e-08	2e-05	PGSC0003DMG400005196	63268600..63276200	Ankyrin		11
chr01	55104017	TSC	T	A		112	9	59	34	2.2058e-07	3e-05	PGSC0003DMG400005196	63268600..63276200	Ankyrin		11
chr01	54994530	TSC	T	A		56	52	23	66	0.000249424	0.00578	PGSC0003DMG400046605	63378540..63379830	Gene of unknown function		11
chr01	54994654	TY	G	T	E/D	26	103	79	64	2.90339e-09	0	PGSC0003DMG400046605	63378540..63379830	Gene of unknown function		11
chr01	54994654	TSY	G	T	E/D	35	83	65	52	7.20294e-05	0.00652	PGSC0003DMG400046605	63378540..63379830	Gene of unknown function		11
chr01	54994670	TY	C	T	P/S	31	110	90	68	6.00476e-10	0	PGSC0003DMG400046605	63378540..63379830	Gene of unknown function		11
chr01	54994670	TSY	C	T	P/S	41	86	73	55	8.9396e-05	0.00754	PGSC0003DMG400046605	63378540..63379830	Gene of unknown function		11
chr01	54994720	TY	G	T		23	52	50	39	0.00153487	0.02672	PGSC0003DMG400046605	63378540..63379830	Gene of unknown function		11
chr01	54994730	TY	G	A	A/T	24	54	49	39	0.00167476	0.02837	PGSC0003DMG400046605	63378540..63379830	Gene of unknown function		11
chr01	54941632	TSC	G	T		23	60	3	83	9.11279e-06	0.00049	PGSC0003DMG400001123	63429000..63447300	Protein translocase subunit secA		11
chr01	54941632	TY	G	T		1	66	17	97	0.00347624	0.04654	PGSC0003DMG400001123	63429000..63447300	Protein translocase subunit secA		11
chr01	54941647	TSC	A	G		77	56	53	82	0.00327727	0.03676	PGSC0003DMG400001123	63429000..63447300	Protein translocase subunit secA		11
chr01	54943087	TSC	G	A		154	42	163	16	0.000922891	0.01492	PGSC0003DMG400001123	63429000..63447300	Protein translocase subunit secA		11
chr01	54943248	TSC	C	T		30	14	16	33	0.000856416	0.01414	PGSC0003DMG400001123	63429000..63447300	Protein translocase subunit secA		11
chr01	54926629	TSC	A	T		53	114	19	168	6.1861e-07	6e-05	PGSC0003DMG400001120	63445050..63448670	Ribonuclease P		11
chr01	54926629	TY	A	T		20	175	46	153	0.000694308	0.01545	PGSC0003DMG400001120	63445050..63448670	Ribonuclease P		11
chr01	54926674	TY	G	C		167	72	203	46	0.00303095	0.04246	PGSC0003DMG400001120	63445050..63448670	Ribonuclease P		11
chr01	54926735	TSC	C	A	P/T	76	53	49	74	0.00261044	0.0314	PGSC0003DMG400001120	63445050..63448670	Ribonuclease P		11
chr01	54889768	TSC	C	T	A/V	175	75	142	106	0.00382965	0.04101	PGSC0003DMG401001116	63483900..63491000	Protein CHMP7		11
chr01	54889768	TY	C	T	A/V	142	106	193	56	1.5655e-06	0.00019	PGSC0003DMG401001116	63483900..63491000	Protein CHMP7		11
chr01	54889768	TSY	C	T	A/V	162	87	195	55	0.0014928	0.04621	PGSC0003DMG401001116	63483900..63491000	Protein CHMP7		11
chr01	54889807	TSY	A	G	H/R	138	8	126	30	0.000396756	0.01992	PGSC0003DMG401001116	63483900..63491000	Protein CHMP7		11
chr01	57114925	TSC	A	G		78	31	50	54	0.000737692	0.01269	PGSC0003DMG400017958	64078200..64087400	Nucleotide pyrophosphatase/phosphodiesterase		12	3
chr01	57114995	TSC	C	A		10	128	32	94	7.57036e-05	0.0024	PGSC0003DMG400017958	64078200..64087400	Nucleotide pyrophosphatase/phosphodiesterase		12	3
chr01	57114995	TY	C	A		31	102	5	173	2.8176e-08	1e-05	PGSC0003DMG400017958	64078200..64087400	Nucleotide pyrophosphatase/phosphodiesterase		12	3
chr01	57114995	TSY	C	A		20	86	3	135	9.31793e-06	0.00166	PGSC0003DMG400017958	64078200..64087400	Nucleotide pyrophosphatase/phosphodiesterase		12	3
chr01	57115010	TSC	A	T		52	96	91	47	2.94808e-07	4e-05	PGSC0003DMG400017958	64078200..64087400	Nucleotide pyrophosphatase/phosphodiesterase		12	3
chr01	57115097	TSC	G	A		4	50	16	34	0.00225584	0.02832	PGSC0003DMG400017958	64078200..64087400	Nucleotide pyrophosphatase/phosphodiesterase		12	3
chr01	57115097	TY	G	A		15	40	3	78	0.00012902	0.00473	PGSC0003DMG400017958	64078200..64087400	Nucleotide pyrophosphatase/phosphodiesterase		12	3
chr01	57115141	TSY	C	T		31	3	25	18	0.00164176	0.0489	PGSC0003DMG400017958	64078200..64087400	Nucleotide pyrophosphatase/phosphodiesterase		12	3
chr01	57129972	TY	A	C		217	14	189	33	0.00306351	0.04277	PGSC0003DMG400017957	64091500..64098100	Set domain protein		12	3
chr01	57130071	TSY	G	T		221	4	219	31	4.71153e-06	0.00104	PGSC0003DMG400017957	64091500..64098100	Set domain protein		12	3
chr01	57130078	TY	C	T		60	156	25	211	3.53171e-06	0.00034	PGSC0003DMG400017957	64091500..64098100	Set domain protein		12	3
chr01	57130078	TSY	C	T		57	141	31	200	0.000110391	0.00864	PGSC0003DMG400017957	64091500..64098100	Set domain protein		12	3
chr01	57130088	TSC	C	T		108	83	73	109	0.00185332	0.02462	PGSC0003DMG400017957	64091500..64098100	Set domain protein		12	3
chr01	57132804	TSC	C	T		133	117	88	162	7.10962e-05	0.00229	PGSC0003DMG400017957	64091500..64098100	Set domain protein		12	3
chr01	57132826	TY	A	C		198	48	220	23	0.00193894	0.03133	PGSC0003DMG400017957	64091500..64098100	Set domain protein		12	3
chr01	57132826	TSY	A	C		187	58	217	25	0.000100798	0.00816	PGSC0003DMG400017957	64091500..64098100	Set domain protein		12	3
chr01	57132836	TY	A	G		75	162	27	208	9.92945e-08	2e-05	PGSC0003DMG400017957	64091500..64098100	Set domain protein		12	3
chr01	57132836	TSY	A	G		66	166	26	212	1.53239e-06	0.00048	PGSC0003DMG400017957	64091500..64098100	Set domain protein		12	3
chr01	57132858	TY	G	A		65	149	22	193	1.7205e-07	4e-05	PGSC0003DMG400017957	64091500..64098100	Set domain protein		12	3
chr01	57132858	TSY	G	A		58	153	25	192	2.91762e-05	0.00357	PGSC0003DMG400017957	64091500..64098100	Set domain protein		12	3
chr01	57132879	TY	T	C		102	103	40	167	7.86863e-11	0	PGSC0003DMG400017957	64091500..64098100	Set domain protein		12	3
chr01	57132879	TSY	T	C		104	99	46	160	1.15145e-09	0	PGSC0003DMG400017957	64091500..64098100	Set domain protein		12	3
chr01	57132957	TSC	A	T		195	20	180	4	0.0027134	0.03227	PGSC0003DMG400017957	64091500..64098100	Set domain protein		12	3
chr01	57157536	TSC	C	T		70	45	72	7	1.34365e-06	0.00012	PGSC0003DMG400017956	64120000..64127100	Protein cdcH		12	3
chr01	57157557	TSC	G	A		75	59	86	9	5.4814e-09	0	PGSC0003DMG400017956	64120000..64127100	Protein cdcH		12	3
chr01	57157622	TSC	A	G		20	219	43	179	0.000647626	0.01156	PGSC0003DMG400017956	64120000..64127100	Protein cdcH		12	3
chr01	57157622	TY	A	G		57	163	22	221	1.78338e-06	0.00021	PGSC0003DMG400017956	64120000..64127100	Protein cdcH		12	3
chr01	57157622	TSY	A	G		45	152	24	210	0.000540724	0.02424	PGSC0003DMG400017956	64120000..64127100	Protein cdcH		12	3
chr01	57157732	TSC	A	G		111	41	207	15	1.09938e-07	2e-05	PGSC0003DMG400017956	64120000..64127100	Protein cdcH		12	3
chr01	57266646	TSC	T	C		127	24	74	51	5.57715e-06	0.00034	PGSC0003DMG400006748	64228700..64236600	Glucose-inhibited division A family protein		12	3
chr01	57266646	TSY	T	C		114	19	87	47	0.000109114	0.00858	PGSC0003DMG400006748	64228700..64236600	Glucose-inhibited division A family protein		12	3
chr01	57266662	TSC	T	A		86	78	115	25	3.64573e-08	1e-05	PGSC0003DMG400006748	64228700..64236600	Glucose-inhibited division A family protein		12	3
chr01	57266736	TY	A	G		23	47	7	79	0.000160956	0.00554	PGSC0003DMG400006748	64228700..64236600	Glucose-inhibited division A family protein		12	3
chr01	57266740	TSC	C	T		56	26	68	4	3.10062e-05	0.00124	PGSC0003DMG400006748	64228700..64236600	Glucose-inhibited division A family protein		12	3
chr01	57266742	TY	A	G		21	46	9	77	0.00182297	0.03007	PGSC0003DMG400006748	64228700..64236600	Glucose-inhibited division A family protein		12	3
chr01	57266797	TSC	C	A		53	8	17	21	1.16755e-05	0.0006	PGSC0003DMG400006748	64228700..64236600	Glucose-inhibited division A family protein		12	3
chr01	57266814	TSC	C	T		19	29	26	6	0.000247164	0.00575	PGSC0003DMG400006748	64228700..64236600	Glucose-inhibited division A family protein		12	3
chr01	57292292	TSC	C	A		71	178	118	86	3.60009e-10	0	PGSC0003DMG400006816	64255610..64260090	ATP binding protein		12	3
chr01	57292292	TY	C	A		143	81	112	136	6.67973e-05	0.00297	PGSC0003DMG400006816	64255610..64260090	ATP binding protein		12	3
chr01	57361268	TY	T	A		71	19	148	4	3.8261e-06	0.00036	PGSC0003DMG402006819	64322000..64335900	Glutamate dehydrogenase		12	3
chr01	57361374	TY	T	C		57	108	124	88	4.51182e-06	0.00041	PGSC0003DMG402006819	64322000..64335900	Glutamate dehydrogenase		12	3
chr01	57361374	TSY	T	C		68	92	125	80	0.000494724	0.02294	PGSC0003DMG402006819	64322000..64335900	Glutamate dehydrogenase		12	3
chr01	57361378	TSC	A	G		159	14	111	35	0.000141182	0.00382	PGSC0003DMG402006819	64322000..64335900	Glutamate dehydrogenase		12	3
chr01	57361378	TSY	A	G		152	7	170	34	0.000189927	0.01234	PGSC0003DMG402006819	64322000..64335900	Glutamate dehydrogenase		12	3
chr01	57383147	TSC	G	T		80	9	45	26	8.42202e-05	0.0026	PGSC0003DMG400006752	64341200..64350000	SDL-1 protein		12	3
chr01	57383231	TSC	T	A		80	101	36	126	2.11103e-05	0.00093	PGSC0003DMG400006752	64341200..64350000	SDL-1 protein		12	3
chr01	57383364	TSC	A	C		60	59	84	32	0.000772399	0.01312	PGSC0003DMG400006752	64341200..64350000	SDL-1 protein		12	3
chr01	57383376	TSC	A	G		110	10	77	33	3.31128e-05	0.0013	PGSC0003DMG400006752	64341200..64350000	SDL-1 protein		12	3
chr01	57556346	TY	C	T		30	53	84	56	0.000834055	0.01753	PGSC0003DMG400006825	64517300..64522800	F-box family protein		12	3
chr01	57556429	TY	A	G		127	86	100	140	0.000162552	0.00558	PGSC0003DMG400006825	64517300..64522800	F-box family protein		12	3
chr01	57556430	TY	T	A		101	112	174	65	3.45913e-08	1e-05	PGSC0003DMG400006825	64517300..64522800	F-box family protein		12	3
chr01	57556430	TSY	T	A		86	112	169	70	1.25097e-08	2e-05	PGSC0003DMG400006825	64517300..64522800	F-box family protein		12	3
chr01	57556455	TY	C	T		147	24	211	7	0.000108012	0.00417	PGSC0003DMG400006825	64517300..64522800	F-box family protein		12	3
chr01	57556472	TY	G	T		128	24	199	9	0.000311457	0.00884	PGSC0003DMG400006825	64517300..64522800	F-box family protein		12	3
chr01	57556476	TY	T	A		130	21	202	8	0.000670387	0.01508	PGSC0003DMG400006825	64517300..64522800	F-box family protein		12	3
chr01	57556534	TY	G	A		165	6	151	53	4.46662e-10	0	PGSC0003DMG400006825	64517300..64522800	F-box family protein		12	3
chr01	57556534	TSY	G	A		150	11	145	34	0.00116743	0.03954	PGSC0003DMG400006825	64517300..64522800	F-box family protein		12	3
chr01	57579916	TY	C	T	E/K	49	49	105	30	1.25894e-05	0.00088	PGSC0003DMG401006826	64539700..64547000	Aldehyde oxidase		12	3
chr01	57579916	TSY	C	T	E/K	47	40	89	23	0.000200391	0.01273	PGSC0003DMG401006826	64539700..64547000	Aldehyde oxidase		12	3
chr01	57580077	TY	G	A	P/L	70	139	140	70	1.0803e-11	0	PGSC0003DMG401006826	64539700..64547000	Aldehyde oxidase		12	3
chr01	57580077	TSY	G	A	P/L	60	121	138	72	1.26327e-10	0	PGSC0003DMG401006826	64539700..64547000	Aldehyde oxidase		12	3
chr01	57580153	TY	T	G	T/P	47	86	128	73	4.25465e-07	7e-05	PGSC0003DMG401006826	64539700..64547000	Aldehyde oxidase		12	3
chr01	57580153	TSY	T	G	T/P	48	89	110	73	1.00598e-05	0.00174	PGSC0003DMG401006826	64539700..64547000	Aldehyde oxidase		12	3
chr01	57580181	TY	C	A	M/I	40	32	85	26	0.00347941	0.04657	PGSC0003DMG401006826	64539700..64547000	Aldehyde oxidase		12	3
chr01	57629109	TSC	G	A		176	31	117	63	5.36221e-06	0.00033	PGSC0003DMG401006827	64593000..64597380	Conserved gene of unknown function		12	3
chr01	57781651	TY	T	G	I/M	184	32	230	5	5.14699e-07	8e-05	PGSC0003DMG400006769	64744700..64752000	Leucine-rich repeat containing protein		12	3
chr01	57781651	TSY	T	G	I/M	141	26	196	5	6.16484e-06	0.00124	PGSC0003DMG400006769	64744700..64752000	Leucine-rich repeat containing protein		12	3
chr01	57790592	TY	C	G		137	16	154	46	0.00282091	0.04045	PGSC0003DMG400006830	64754530..64756780	Protein kinase APK1B, chloroplast	signaling, regulation	12	3
chr01	57790595	TSC	C	T		136	34	147	13	0.00251428	0.03058	PGSC0003DMG400006830	64754530..64756780	Protein kinase APK1B, chloroplast		12	3
chr01	57790703	TY	A	G		40	40	102	39	0.00124979	0.02318	PGSC0003DMG400006830	64754530..64756780	Protein kinase APK1B, chloroplast		12	3
chr01	57791171	TY	T	G		73	118	138	73	5.78137e-08	2e-05	PGSC0003DMG400006830	64754530..64756780	Protein kinase APK1B, chloroplast		12	3
chr01	57791171	TSY	T	G		72	99	130	73	2.92373e-05	0.00357	PGSC0003DMG400006830	64754530..64756780	Protein kinase APK1B, chloroplast		12	3
chr01	57791279	TY	G	A		28	67	71	68	0.00120174	0.02259	PGSC0003DMG400006830	64754530..64756780	Protein kinase APK1B, chloroplast		12	3
chr01	57839640	TY	C	T	S/L	28	24	62	8	2.23323e-05	0.00134	PGSC0003DMG400006770	64802400..64809500	Conserved gene of unknown function		12	3
chr01	57839640	TSY	C	T	S/L	18	19	46	7	0.000126836	0.00946	PGSC0003DMG400006770	64802400..64809500	Conserved gene of unknown function		12	3
chr01	57839661	TSC	C	T	P/L	72	6	33	16	0.000523425	0.00992	PGSC0003DMG400006770	64802400..64809500	Conserved gene of unknown function		12	3
chr01	57839899	TSC	G	A		80	5	45	25	3.07156e-06	0.00022	PGSC0003DMG400006770	64802400..64809500	Conserved gene of unknown function		12	3
chr01	57839903	TSC	T	G		82	5	45	26	1.321e-06	0.00012	PGSC0003DMG400006770	64802400..64809500	Conserved gene of unknown function		12	3
chr01	58014838	TSC	A	G		208	29	173	51	0.00311895	0.03552	PGSC0003DMG400006778	64977300..64993900	Glucosamine-fructose-6-phosphate aminotransferase		12	3
chr01	58014841	TY	C	T		157	51	230	13	4.50567e-09	0	PGSC0003DMG400006778	64977300..64993900	Glucosamine-fructose-6-phosphate aminotransferase		12	3
chr01	58014841	TSY	C	T		135	39	222	20	5.70165e-05	0.00561	PGSC0003DMG400006778	64977300..64993900	Glucosamine-fructose-6-phosphate aminotransferase		12	3
chr01	58014875	TY	C	T		157	35	229	11	6.14193e-06	0.00052	PGSC0003DMG400006778	64977300..64993900	Glucosamine-fructose-6-phosphate aminotransferase		12	3
chr01	58014875	TSY	C	T		126	30	220	17	0.000422428	0.02072	PGSC0003DMG400006778	64977300..64993900	Glucosamine-fructose-6-phosphate aminotransferase		12	3
chr01	58014960	TY	C	T		132	28	189	11	0.000304021	0.00869	PGSC0003DMG400006778	64977300..64993900	Glucosamine-fructose-6-phosphate aminotransferase		12	3
chr01	58014960	TSY	C	T		101	30	163	13	0.000189783	0.01234	PGSC0003DMG400006778	64977300..64993900	Glucosamine-fructose-6-phosphate aminotransferase		12	3
chr01	58014981	TY	T	C		146	31	217	10	1.96401e-05	0.00122	PGSC0003DMG400006778	64977300..64993900	Glucosamine-fructose-6-phosphate aminotransferase		12	3
chr01	58015028	TY	T	C		67	15	115	3	0.000201589	0.00651	PGSC0003DMG400006778	64977300..64993900	Glucosamine-fructose-6-phosphate aminotransferase		12	3
chr01	58058957	TY	G	A		126	20	147	74	1.67103e-05	0.00109	PGSC0003DMG400006841	65024940..65022330	SBT4B protein, subtilisin-like protease		12	3
chr01	58058957	TSY	G	A		112	17	120	59	5.60717e-05	0.00555	PGSC0003DMG400006841	65024940..65022330	SBT4B protein, subtilisin-like protease		12	3
chr01	58059050	TY	A	T		119	128	69	175	7.67628e-06	0.00061	PGSC0003DMG400006841	65024940..65022330	SBT4B protein, subtilisin-like protease		12	3
chr01	58059090	TSY	A	G	I/T	188	34	218	11	0.000232684	0.01405	PGSC0003DMG400006841	65024940..65022330	SBT4B protein, subtilisin-like protease		12	3
chr01	58059131	TSY	A	G		137	33	114	63	0.000786238	0.03078	PGSC0003DMG400006841	65024940..65022330	SBT4B protein, subtilisin-like protease		12	3
chr01	58059134	TSY	C	T		141	34	119	65	0.000904279	0.03362	PGSC0003DMG400006841	65024940..65022330	SBT4B protein, subtilisin-like protease		12	3
chr01	58059161	TSY	T	C		175	42	143	85	3.80971e-05	0.00426	PGSC0003DMG400006841	65024940..65022330	SBT4B protein, subtilisin-like protease		12	3
chr01	58059187	TY	C	T	D/N	108	19	86	74	1.42808e-08	1e-05	PGSC0003DMG400006841	65024940..65022330	SBT4B protein, subtilisin-like protease		12	3
chr01	58059187	TSY	C	T	D/N	101	32	71	58	0.000432764	0.02105	PGSC0003DMG400006841	65024940..65022330	SBT4B protein, subtilisin-like protease		12	3
chr01	58104864	TSC	A	T	L/M	144	106	137	55	0.00376698	0.04055	PGSC0003DMG400006844	65069160..65069900	Subtilase		12	3
chr01	58104864	TY	A	T	L/M	187	49	150	98	7.9185e-06	0.00062	PGSC0003DMG400006844	65069160..65069900	Subtilase		12	3
chr01	58104901	TSC	A	T		100	149	140	102	0.00010169	0.00299	PGSC0003DMG400006844	65069160..65069900	Subtilase		12	3
chr01	58104901	TY	A	T		164	75	120	128	6.45654e-06	0.00054	PGSC0003DMG400006844	65069160..65069900	Subtilase		12	3
chr01	58367299	TSC	C	G		122	24	87	42	0.00191854	0.02523	PGSC0003DMG400006853	65328400..65335100	Conserved gene of unknown function		12	3
chr01	58367299	TY	C	G		70	50	162	38	1.70142e-05	0.0011	PGSC0003DMG400006853	65328400..65335100	Conserved gene of unknown function		12	3
chr01	58367409	TSC	T	A		181	28	118	63	6.73788e-07	7e-05	PGSC0003DMG400006853	65328400..65335100	Conserved gene of unknown function		12	3
chr01	58367409	TY	T	A		97	51	192	37	5.89903e-05	0.00271	PGSC0003DMG400006853	65328400..65335100	Conserved gene of unknown function		12	3
chr01	58377008	TSC	C	T		163	35	184	6	1.82768e-06	0.00015	PGSC0003DMG400006854	65337100..65344000	Polyamine oxidase		12	3
chr01	58523418	TY	A	G		76	38	188	13	1.52224e-09	0	PGSC0003DMG400006861	65487800..65494500	Conserved gene of unknown function		12	3
chr01	58523446	TY	T	C		13	83	66	96	3.11407e-06	0.00031	PGSC0003DMG400006861	65487800..65494500	Conserved gene of unknown function		12	3
chr01	58817474	TSC	C	T	S/L	83	26	37	31	0.00307764	0.03519	PGSC0003DMG400006800	65780440..65783920	NBS-LRR protein		12	3
chr01	58817510	TSC	C	T	P/L	114	33	46	57	1.32786e-07	2e-05	PGSC0003DMG400006800	65780440..65783920	NBS-LRR protein		12	3
chr01	58817535	TSC	C	T		94	43	48	62	9.83737e-05	0.00292	PGSC0003DMG400006800	65780440..65783920	NBS-LRR protein		12	3
chr01	58817541	TY	C	A	S/R	94	61	186	61	0.00254649	0.03772	PGSC0003DMG400006800	65780440..65783920	NBS-LRR protein		12	3
chr01	58817661	TY	A	C		10	201	40	199	3.90852e-05	0.00202	PGSC0003DMG400006800	65780440..65783920	NBS-LRR protein		12	3
chr01	58817667	TSC	G	T		184	65	179	22	4.1811e-05	0.00155	PGSC0003DMG400006800	65780440..65783920	NBS-LRR protein		12	3
chr01	58817667	TY	G	T		179	36	232	16	0.000593758	0.01387	PGSC0003DMG400006800	65780440..65783920	NBS-LRR protein		12	3
chr01	58817667	TSY	G	T		165	52	200	17	5.54056e-06	0.00116	PGSC0003DMG400006800	65780440..65783920	NBS-LRR protein		12	3
chr01	58817676	TY	T	C		10	222	44	206	2.35232e-06	0.00026	PGSC0003DMG400006800	65780440..65783920	NBS-LRR protein		12	3
chr01	58817737	TSC	G	A	V/I	36	108	12	104	0.00349072	0.0384	PGSC0003DMG400006800	65780440..65783920	NBS-LRR protein		12	3
chr01	58817737	TY	G	A	V/I	7	112	34	127	0.000283385	0.00827	PGSC0003DMG400006800	65780440..65783920	NBS-LRR protein		12	3
chr01	58817748	TSC	G	T		38	112	12	100	0.00391711	0.04166	PGSC0003DMG400006800	65780440..65783920	NBS-LRR protein		12	3
chr01	58817748	TY	G	T		8	114	34	128	0.000638771	0.01459	PGSC0003DMG400006800	65780440..65783920	NBS-LRR protein		12	3
chr01	58817754	TY	C	G	I/M	7	108	35	130	0.000536622	0.01294	PGSC0003DMG400006800	65780440..65783920	NBS-LRR protein		12	3
chr01	58875727	TSC	T	C		105	88	119	19	3.81276e-10	0	PGSC0003DMG400006866	65839600..65847800	DNA-damage-inducible protein f		12	3
chr01	58875727	TY	T	C		145	20	142	74	6.25504e-07	0.0001	PGSC0003DMG400006866	65839600..65847800	DNA-damage-inducible protein f		12	3
chr01	58875818	TSC	C	T		151	74	79	149	4.71202e-12	0	PGSC0003DMG400006866	65839600..65847800	DNA-damage-inducible protein f		12	3
chr01	58997747	TSC	A	T		56	5	18	26	1.69307e-08	0	PGSC0003DMG400006807	65958700..65964500	E3 ubiquitin ligase BIG BROTHER		12	3
chr01	58997836	TSC	T	C		131	33	135	10	0.000863869	0.01423	PGSC0003DMG400006807	65958700..65964500	E3 ubiquitin ligase BIG BROTHER		12	3
chr01	58997864	TSC	G	T		105	50	54	76	1.45675e-05	0.0007	PGSC0003DMG400006807	65958700..65964500	E3 ubiquitin ligase BIG BROTHER		12	3
chr01	58997887	TSC	G	A		94	36	47	64	3.72148e-06	0.00025	PGSC0003DMG400006807	65958700..65964500	E3 ubiquitin ligase BIG BROTHER		12	3
chr01	58997887	TY	G	A		61	68	99	50	0.0015456	0.02685	PGSC0003DMG400006807	65958700..65964500	E3 ubiquitin ligase BIG BROTHER		12	3
chr01	58997889	TSC	G	A		93	33	52	60	1.89487e-05	0.00086	PGSC0003DMG400006807	65958700..65964500	E3 ubiquitin ligase BIG BROTHER		12	3
chr01	58997957	TY	T	A		146	39	210	22	0.00121117	0.0227	PGSC0003DMG400006807	65958700..65964500	E3 ubiquitin ligase BIG BROTHER		12	3
chr01	59026390	TSC	T	C		63	33	25	36	0.00301035	0.03465	PGSC0003DMG400006808	65991133..65991565	TRANSPARENT TESTA 1 protein		12	3
chr01	59026453	TSC	T	C		126	10	74	30	1.59702e-05	0.00076	PGSC0003DMG400006808	65991133..65991565	TRANSPARENT TESTA 1 protein		12	3
chr01	59026483	TSC	T	C		176	44	61	117	1.06737e-20	0	PGSC0003DMG400006808	65991133..65991565	TRANSPARENT TESTA 1 protein		12	3
chr01	59026483	TY	T	C		80	80	161	86	0.00274294	0.03969	PGSC0003DMG400006808	65991133..65991565	TRANSPARENT TESTA 1 protein		12	3
chr01	59026513	TSC	G	A		206	27	136	68	5.44329e-08	1e-05	PGSC0003DMG400006808	65991133..65991565	TRANSPARENT TESTA 1 protein		12	3
chr01	59026531	TSC	T	C		215	5	166	20	0.000602963	0.01098	PGSC0003DMG400006808	65991133..65991565	TRANSPARENT TESTA 1 protein		12	3
chr01	59026555	TSC	C	T		176	22	112	56	3.6698e-07	4e-05	PGSC0003DMG400006808	65991133..65991565	TRANSPARENT TESTA 1 protein		12	3
chr01	59054532	TSC	A	G	I/T	119	42	110	15	0.00429849	0.04446	PGSC0003DMG401006875	66018740..66019610	Conserved gene of unknown function		12	3
chr01	59054546	TY	T	C		216	33	238	10	0.00034198	0.00945	PGSC0003DMG401006875	66018740..66019610	Conserved gene of unknown function		12	3
chr01	59054571	TSY	A	G	F/S	180	41	225	19	0.000776434	0.03055	PGSC0003DMG401006875	66018740..66019610	Conserved gene of unknown function		12	3
chr01	59054591	TSY	G	A		49	134	104	127	0.000145157	0.01032	PGSC0003DMG401006875	66018740..66019610	Conserved gene of unknown function		12	3
chr01	59054606	TSC	C	T		168	58	208	18	5.702e-07	6e-05	PGSC0003DMG401006875	66018740..66019610	Conserved gene of unknown function		12	3
chr01	59060433	TSC	G	A		136	14	61	36	2.14679e-07	3e-05	PGSC0003DMG400006876	66024020..66025960	Conserved gene of unknown function		12	3
chr01	59060472	TSC	C	G		174	25	85	49	4.13587e-07	5e-05	PGSC0003DMG400006876	66024020..66025960	Conserved gene of unknown function		12	3
chr01	59060496	TSC	T	C		107	143	49	145	0.000135103	0.00369	PGSC0003DMG400006876	66024020..66025960	Conserved gene of unknown function		12	3
chr01	59060506	TY	A	G	M/T	152	96	189	61	0.000716529	0.01579	PGSC0003DMG400006876	66024020..66025960	Conserved gene of unknown function		12	3
chr01	59060506	TSY	A	G	M/T	149	95	190	60	0.000462475	0.02196	PGSC0003DMG400006876	66024020..66025960	Conserved gene of unknown function		12	3
chr01	59060645	TY	A	G		204	37	233	16	0.00201656	0.03218	PGSC0003DMG400006876	66024020..66025960	Conserved gene of unknown function		12	3
chr01	59060646	TSY	C	G		129	87	186	60	0.00030477	0.01678	PGSC0003DMG400006876	66024020..66025960	Conserved gene of unknown function		12	3
chr01	59129547	TSC	A	T		197	50	193	19	0.000953852	0.01527	PGSC0003DMG400006879	66093560..66096000	SWIB complex BAF60b domain-containing protein		12	3
chr01	59129547	TY	A	T		209	15	208	41	0.000993894	0.01981	PGSC0003DMG400006879	66093560..66096000	SWIB complex BAF60b domain-containing protein		12	3
chr01	59129624	TSC	G	T		142	14	89	44	3.34074e-07	4e-05	PGSC0003DMG400006879	66093560..66096000	SWIB complex BAF60b domain-containing protein		12	3
chr01	59989770	TY	A	G		59	76	43	121	0.00211052	0.03321	PGSC0003DMG401028974	66951100..66959900	Molybdopterin cofactor synthesis protein A
chr01	59989770	TSY	A	G		67	48	29	92	8.9878e-08	6e-05	PGSC0003DMG401028974	66951100..66959900	Molybdopterin cofactor synthesis protein A
chr01	59989779	TSC	C	T		8	64	0	78	0.00227669	0.0285	PGSC0003DMG401028974	66951100..66959900	Molybdopterin cofactor synthesis protein A
chr01	60052977	TSC	G	A		21	174	0	131	2.6047e-05	0.00109	PGSC0003DMG400028986	67017820..67019630	ATP binding protein		13
chr01	60052977	TY	G	A		0	160	23	150	1.55201e-07	3e-05	PGSC0003DMG400028986	67017820..67019630	ATP binding protein		13
chr01	60052998	TY	A	T		1	96	13	91	0.00140274	0.02512	PGSC0003DMG400028986	67017820..67019630	ATP binding protein		13
chr01	60148099	TSY	A	T		16	29	6	61	0.00118504	0.03988	PGSC0003DMG400031117	67112400..67118000	Conserved gene of unknown function		13
chr01	60148177	TY	G	A		58	91	42	153	0.000507242	0.01243	PGSC0003DMG400031117	67112400..67118000	Conserved gene of unknown function		13
chr01	60148177	TSY	G	A		56	69	32	140	1.51335e-06	0.00047	PGSC0003DMG400031117	67112400..67118000	Conserved gene of unknown function		13
chr01	60148191	TY	T	A		47	96	31	153	0.00101277	0.02006	PGSC0003DMG400031117	67112400..67118000	Conserved gene of unknown function		13
chr01	60148191	TSY	T	A		40	80	22	138	0.000134167	0.00981	PGSC0003DMG400031117	67112400..67118000	Conserved gene of unknown function		13
chr01	60170557	TSY	A	T	Q/H	71	104	38	154	2.02852e-05	0.0028	PGSC0003DMG400031128	67135280..67137800	Beta-hexosaminidase 1		13
chr01	60170592	TSY	C	A	T/N	61	83	31	126	3.10758e-05	0.00372	PGSC0003DMG400031128	67135280..67137800	Beta-hexosaminidase 1		13
chr01	60170626	TSC	C	A		203	12	150	59	2.39956e-10	0	PGSC0003DMG400031128	67135280..67137800	Beta-hexosaminidase 1		13
chr01	60170701	TSC	C	T		157	58	117	87	0.000981414	0.01559	PGSC0003DMG400031128	67135280..67137800	Beta-hexosaminidase 1		13
chr01	60170702	TSC	A	C	I/L	155	58	117	87	0.00101375	0.01595	PGSC0003DMG400031128	67135280..67137800	Beta-hexosaminidase 1		13
chr01	60170704	TSC	A	C		146	59	110	84	0.00338399	0.03757	PGSC0003DMG400031128	67135280..67137800	Beta-hexosaminidase 1		13
chr01	60170761	TSC	G	A		93	33	63	51	0.00294106	0.03408	PGSC0003DMG400031128	67135280..67137800	Beta-hexosaminidase 1		13
chr01	60293240	TSC	G	T		217	11	181	47	4.08221e-07	5e-05	PGSC0003DMG400031110	67255430..67259390	Conserved gene of unknown function		13
chr01	60293266	TSC	T	C		231	16	190	50	4.38121e-06	0.00028	PGSC0003DMG400031110	67255430..67259390	Conserved gene of unknown function		13
chr01	60299271	TY	C	A		119	48	109	119	3.26221e-06	0.00032	PGSC0003DMG400031122	67259500..67268300	Ubiquinone/menaquinone biosynthesis methyltransferase		13
chr01	60299271	TSY	C	A		89	47	99	114	0.00062841	0.0267	PGSC0003DMG400031122	67259500..67268300	Ubiquinone/menaquinone biosynthesis methyltransferase		13
chr01	60299281	TSC	G	A		205	12	143	39	2.02547e-06	0.00016	PGSC0003DMG400031122	67259500..67268300	Ubiquinone/menaquinone biosynthesis methyltransferase		13
chr01	60299315	TSC	T	A		109	139	120	84	0.00182224	0.02433	PGSC0003DMG400031122	67259500..67268300	Ubiquinone/menaquinone biosynthesis methyltransferase		13
chr01	60299315	TY	T	A		137	60	117	125	7.72905e-06	0.00061	PGSC0003DMG400031122	67259500..67268300	Ubiquinone/menaquinone biosynthesis methyltransferase		13
chr01	60312880	TSC	G	A	G/R	187	12	133	41	1.18935e-06	0.00011	PGSC0003DMG400031120	67276650..67279880	Glycine-rich protein A3		13
chr01	60312889	TSC	T	C	S/P	75	107	100	76	0.00423876	0.04402	PGSC0003DMG400031120	67276650..67279880	Glycine-rich protein A3		13
chr01	60313009	TSC	T	G	S/A	87	48	86	16	0.000656664	0.01167	PGSC0003DMG400031120	67276650..67279880	Glycine-rich protein A3		13
chr01	60558768	TY	T	C		126	18	221	8	0.00136436	0.02464	PGSC0003DMG401001782	67523600..67529300	Conserved gene of unknown function
chr01	60558811	TSC	G	A		191	5	145	19	0.00101562	0.01598	PGSC0003DMG401001782	67523600..67529300	Conserved gene of unknown function
chr01	60558811	TY	G	A		158	27	193	6	4.27281e-05	0.00216	PGSC0003DMG401001782	67523600..67529300	Conserved gene of unknown function
chr01	60558840	TY	A	G		4	198	26	183	3.47481e-05	0.00185	PGSC0003DMG401001782	67523600..67529300	Conserved gene of unknown function
chr01	60558863	TSC	G	A		233	7	182	23	0.000531451	0.01002	PGSC0003DMG401001782	67523600..67529300	Conserved gene of unknown function
chr01	60558863	TY	G	A		194	35	234	6	7.22962e-07	0.00011	PGSC0003DMG401001782	67523600..67529300	Conserved gene of unknown function
chr01	60558868	TSC	A	T		244	6	184	24	9.10234e-05	0.00275	PGSC0003DMG401001782	67523600..67529300	Conserved gene of unknown function
chr01	60558868	TY	A	T		198	35	238	5	1.86223e-07	4e-05	PGSC0003DMG401001782	67523600..67529300	Conserved gene of unknown function
chr01	61033054	TSC	A	T		133	8	78	24	7.51131e-05	0.00239	PGSC0003DMG400001672	67996600..68005600	Protoheme IX farnesyltransferase
chr01	61033119	TSC	G	T		217	32	177	72	1.42517e-05	0.00069	PGSC0003DMG400001672	67996600..68005600	Protoheme IX farnesyltransferase
chr01	61033169	TSC	C	T		200	22	170	57	2.1875e-05	0.00095	PGSC0003DMG400001672	67996600..68005600	Protoheme IX farnesyltransferase
chr01	61033185	TSC	G	A		194	19	163	55	6.26583e-06	0.00037	PGSC0003DMG400001672	67996600..68005600	Protoheme IX farnesyltransferase
chr01	61033218	TSC	A	G		172	14	107	44	1.92459e-07	3e-05	PGSC0003DMG400001672	67996600..68005600	Protoheme IX farnesyltransferase
chr01	61033229	TSC	A	G		196	13	115	44	2.48053e-08	1e-05	PGSC0003DMG400001672	67996600..68005600	Protoheme IX farnesyltransferase
chr01	61033249	TSC	T	C		198	34	131	58	8.64192e-05	0.00265	PGSC0003DMG400001672	67996600..68005600	Protoheme IX farnesyltransferase
chr01	61033314	TSC	C	G		132	9	72	22	0.000276969	0.00626	PGSC0003DMG400001672	67996600..68005600	Protoheme IX farnesyltransferase
chr01	61098803	TSC	T	G	K/T	178	18	96	40	3.20168e-06	0.00022	PGSC0003DMG400038943	68063360..68065020	Amidophosphoribosyltransferase
chr01	61098803	TSY	T	G	K/T	127	18	116	43	0.00156819	0.04756	PGSC0003DMG400038943	68063360..68065020	Amidophosphoribosyltransferase
chr01	61098871	TSC	T	C		140	106	105	144	0.00120335	0.01804	PGSC0003DMG400038943	68063360..68065020	Amidophosphoribosyltransferase
chr01	61603628	TSC	A	T		66	21	30	30	0.00152541	0.02139	PGSC0003DMG400001690	68567510..68569360	Protein synthesis initiation factor
chr01	61603840	TY	C	T		90	93	145	79	0.00177767	0.02956	PGSC0003DMG400001690	68567510..68569360	Protein synthesis initiation factor
chr01	61603840	TSY	C	T		83	82	163	59	3.93577e-06	0.00092	PGSC0003DMG400001690	68567510..68569360	Protein synthesis initiation factor
chr01	61603857	TSC	C	T		113	3	76	14	0.00138776	0.01999	PGSC0003DMG400001690	68567510..68569360	Protein synthesis initiation factor
chr01	61603857	TSY	C	T		81	3	78	21	0.000334126	0.0178	PGSC0003DMG400001690	68567510..68569360	Protein synthesis initiation factor
chr01	61603880	TSY	G	T		83	5	68	21	0.00110902	0.03823	PGSC0003DMG400001690	68567510..68569360	Protein synthesis initiation factor
chr01	62015236	TY	T	G		53	15	45	37	0.00350098	0.04676	PGSC0003DMG400031175	69021600..69027200	Transcription factor		14
chr01	62015313	TY	G	A		143	8	158	38	9.73381e-05	0.00387	PGSC0003DMG400031175	69021600..69027200	Transcription factor		14
chr01	62015313	TSY	G	A		111	5	136	31	0.000254585	0.01491	PGSC0003DMG400031175	69021600..69027200	Transcription factor		14
chr01	62015335	TY	T	A		120	6	132	31	0.000292087	0.00844	PGSC0003DMG400031175	69021600..69027200	Transcription factor		14
chr01	62015335	TSY	T	A		91	4	111	26	0.00112823	0.03864	PGSC0003DMG400031175	69021600..69027200	Transcription factor		14
chr01	62015351	TY	C	T		92	25	78	73	6.43199e-06	0.00053	PGSC0003DMG400031175	69021600..69027200	Transcription factor		14
chr01	62146019	TSC	A	G		25	15	28	2	0.00405955	0.04271	PGSC0003DMG400042297	69155410..69156960	Flavonol synthase/flavanone 3-hydroxylase		14
chr01	62146126	TSY	C	G	H/D	94	46	82	105	3.24517e-05	0.00383	PGSC0003DMG400042297	69155410..69156960	Flavonol synthase/flavanone 3-hydroxylase		14
chr01	62146180	TSY	A	T	T/S	112	69	92	124	0.00018366	0.01205	PGSC0003DMG400042297	69155410..69156960	Flavonol synthase/flavanone 3-hydroxylase		14
chr01	62146272	TY	T	C		152	72	106	144	2.73515e-08	1e-05	PGSC0003DMG400042297	69155410..69156960	Flavonol synthase/flavanone 3-hydroxylase		14
chr01	62146272	TSY	T	C		130	78	100	150	1.67456e-06	0.00051	PGSC0003DMG400042297	69155410..69156960	Flavonol synthase/flavanone 3-hydroxylase		14
chr01	62162714	TY	C	G	A/G	73	39	52	71	0.000636688	0.01456	PGSC0003DMG400026057	69155410..69156960	Flavonol synthase/flavanone 3-hydroxylase		14
chr01	62249353	TSY	G	A		94	25	103	83	2.68501e-05	0.00338	PGSC0003DMG400025997	69257910..69259560	Triacylglycerol lipase		14
chr01	62249400	TSC	A	G	Y/H	181	66	217	28	1.8356e-05	0.00084	PGSC0003DMG400025997	69257910..69259560	Triacylglycerol lipase		14
chr01	62249400	TY	A	G	Y/H	204	44	132	117	2.77267e-12	0	PGSC0003DMG400025997	69257910..69259560	Triacylglycerol lipase		14
chr01	62249400	TSY	A	G	Y/H	168	42	126	123	4.15205e-11	0	PGSC0003DMG400025997	69257910..69259560	Triacylglycerol lipase		14
chr01	62249509	TSC	A	G		130	103	168	74	0.00238965	0.0295	PGSC0003DMG400025997	69257910..69259560	Triacylglycerol lipase		14
chr01	62249509	TY	A	G		172	73	98	133	9.00879e-10	0	PGSC0003DMG400025997	69257910..69259560	Triacylglycerol lipase		14
chr01	62249509	TSY	A	G		149	70	90	137	1.85253e-09	0	PGSC0003DMG400025997	69257910..69259560	Triacylglycerol lipase		14
chr01	62249542	TY	A	G		162	42	153	85	0.00049301	0.01219	PGSC0003DMG400025997	69257910..69259560	Triacylglycerol lipase		14
chr01	62249542	TSY	A	G		167	30	150	81	2.85137e-06	0.00073	PGSC0003DMG400025997	69257910..69259560	Triacylglycerol lipase		14
chr01	62249551	TY	G	A		158	12	149	71	3.89879e-10	0	PGSC0003DMG400025997	69257910..69259560	Triacylglycerol lipase		14
chr01	62249551	TSY	G	A		138	17	152	68	4.92631e-06	0.00107	PGSC0003DMG400025997	69257910..69259560	Triacylglycerol lipase		14
chr01	62249569	TY	C	A	E/D	93	40	82	111	1.07345e-06	0.00014	PGSC0003DMG400025997	69257910..69259560	Triacylglycerol lipase		14
chr01	62249569	TSY	C	A	E/D	82	40	73	105	1.204e-05	0.00196	PGSC0003DMG400025997	69257910..69259560	Triacylglycerol lipase		14
chr01	62249572	TSC	G	A		141	19	139	3	0.00134493	0.01953	PGSC0003DMG400025997	69257910..69259560	Triacylglycerol lipase		14
chr01	62397937	TSC	T	C	F/S	13	194	0	153	0.000855061	0.01412	PGSC0003DMG400041045	69407690..69408230	ERF1 (ethylene-responsive transcription factor 1B)		14
chr01	62397953	TSC	T	C		12	210	0	159	0.00176084	0.02376	PGSC0003DMG400041045	69407690..69408230	ERF1 (ethylene-responsive transcription factor 1B)		14
chr01	62397957	TSC	A	G	T/A	12	204	0	155	0.00174574	0.02361	PGSC0003DMG400041045	69407690..69408230	ERF1 (ethylene-responsive transcription factor 1B)		14
chr01	62397980	TSC	C	T		33	154	5	136	4.35076e-05	0.0016	PGSC0003DMG400041045	69407690..69408230	ERF1 (ethylene-responsive transcription factor 1B)		14
chr01	62398046	TSC	A	G		11	225	0	235	0.000866838	0.01427	PGSC0003DMG400041045	69407690..69408230	ERF1 (ethylene-responsive transcription factor 1B)		14
chr01	62398052	TSC	G	A		39	205	5	241	1.93954e-08	0	PGSC0003DMG400041045	69407690..69408230	ERF1 (ethylene-responsive transcription factor 1B)		14
chr01	63200728	TY	C	A		52	41	28	61	0.00103244	0.02031	PGSC0003DMG400025974	70209330..70213910	EF hand family protein (Calcium binding protein)		15	4
chr01	63200728	TSY	C	A		50	27	18	57	3.75964e-07	0.00018	PGSC0003DMG400025974	70209330..70213910	EF hand family protein (Calcium binding protein)		15	4
chr01	63201542	TSC	A	T	M/K	73	96	34	118	8.65294e-05	0.00265	PGSC0003DMG400025974	70209330..70213910	EF hand family protein (Calcium binding protein)		15	4
chr01	63201542	TY	A	T	M/K	54	91	33	132	0.000948658	0.01917	PGSC0003DMG400025974	70209330..70213910	EF hand family protein (Calcium binding protein)		15	4
chr01	63201542	TSY	A	T	M/K	51	81	33	127	0.00109706	0.03797	PGSC0003DMG400025974	70209330..70213910	EF hand family protein (Calcium binding protein)		15	4
chr01	63201571	TSC	C	A	K/N	94	107	43	138	3.80536e-06	0.00025	PGSC0003DMG400025974	70209330..70213910	EF hand family protein (Calcium binding protein)		15	4
chr01	63201571	TY	C	A	K/N	75	102	46	158	4.16674e-05	0.00212	PGSC0003DMG400025974	70209330..70213910	EF hand family protein (Calcium binding protein)		15	4
chr01	63201571	TSY	C	A	K/N	67	92	46	149	0.00023732	0.01424	PGSC0003DMG400025974	70209330..70213910	EF hand family protein (Calcium binding protein)		15	4
chr01	63201582	TSC	C	A	V/F	84	123	41	148	5.89006e-05	0.002	PGSC0003DMG400025974	70209330..70213910	EF hand family protein (Calcium binding protein)		15	4
chr01	63201582	TY	C	A	V/F	70	117	43	173	0.000143812	0.00512	PGSC0003DMG400025974	70209330..70213910	EF hand family protein (Calcium binding protein)		15	4
chr01	63201582	TSY	C	A	V/F	59	109	42	164	0.00158348	0.04785	PGSC0003DMG400025974	70209330..70213910	EF hand family protein (Calcium binding protein)		15	4
chr01	63201837	TSC	A	G		47	101	20	103	0.00446684	0.04571	PGSC0003DMG400025974	70209330..70213910	EF hand family protein (Calcium binding protein)		15	4
chr01	63209584	TY	A	C		133	26	156	9	0.00202021	0.03221	PGSC0003DMG400026014	70215600..70224100	Phosphatidate cytidylyltransferase		15	4
chr01	63210654	TSC	A	T		38	131	14	130	0.00349994	0.03848	PGSC0003DMG400026014	70215600..70224100	Phosphatidate cytidylyltransferase		15	4
chr01	63210693	TSC	A	T		51	134	14	148	7.12361e-06	0.00041	PGSC0003DMG400026014	70215600..70224100	Phosphatidate cytidylyltransferase		15	4
chr01	63399719	TSC	C	T		98	152	51	149	0.00246591	0.03016	PGSC0003DMG400025966	70408200..70417700	Beta-tubulin cofactor d		15	4
chr01	63399719	TSY	C	T		44	125	110	140	0.000195066	0.01252	PGSC0003DMG400025966	70408200..70417700	Beta-tubulin cofactor d		15	4
chr01	63399839	TY	G	T		103	2	183	32	0.000162907	0.00559	PGSC0003DMG400025966	70408200..70417700	Beta-tubulin cofactor d		15	4
chr01	63401449	TSY	T	G		37	124	81	109	0.000111445	0.0087	PGSC0003DMG400025966	70408200..70417700	Beta-tubulin cofactor d		15	4
chr01	63401527	TY	G	A		39	85	74	74	0.00209208	0.03301	PGSC0003DMG400025966	70408200..70417700	Beta-tubulin cofactor d		15	4
chr01	63401527	TSY	G	A		25	69	70	71	0.000428487	0.02091	PGSC0003DMG400025966	70408200..70417700	Beta-tubulin cofactor d		15	4
chr01	63405335	TY	A	T	V/E	143	85	84	165	3.30646e-10	0	PGSC0003DMG400025966	70408200..70417700	Beta-tubulin cofactor d		15	4
chr01	63405376	TY	G	T		71	169	108	127	0.00030911	0.00879	PGSC0003DMG400025966	70408200..70417700	Beta-tubulin cofactor d		15	4
chr01	63405376	TSY	G	T		69	169	118	111	8.13882e-07	0.0003	PGSC0003DMG400025966	70408200..70417700	Beta-tubulin cofactor d		15	4
chr01	63405393	TSC	A	G		12	213	38	178	6.68763e-05	0.0022	PGSC0003DMG400025966	70408200..70417700	Beta-tubulin cofactor d		15	4
chr01	63415358	TY	A	G	V/A	74	147	116	132	0.00356375	0.04731	PGSC0003DMG400025965	70425230..70425850	Conserved gene of unknown function		15	4
chr01	63415358	TSY	A	G	V/A	50	149	122	125	1.82259e-07	0.00011	PGSC0003DMG400025965	70425230..70425850	Conserved gene of unknown function		15	4
chr01	63415363	TY	C	A		74	148	116	129	0.00251507	0.03741	PGSC0003DMG400025965	70425230..70425850	Conserved gene of unknown function		15	4
chr01	63415363	TSY	C	A		52	150	123	122	1.29341e-07	8e-05	PGSC0003DMG400025965	70425230..70425850	Conserved gene of unknown function		15	4
chr01	63503334	TY	G	C		66	8	91	38	0.00277277	0.03998	PGSC0003DMG400026006	70510300..70516700	3-phosphoshikimate 1-carboxyvinyltransferase, chloroplastic		15	4
chr01	63503385	TY	A	C		136	11	174	74	5.70074e-08	2e-05	PGSC0003DMG400026006	70510300..70516700	3-phosphoshikimate 1-carboxyvinyltransferase, chloroplastic		15	4
chr01	63503385	TSY	A	C		123	17	162	77	7.87811e-06	0.00146	PGSC0003DMG400026006	70510300..70516700	3-phosphoshikimate 1-carboxyvinyltransferase, chloroplastic		15	4
chr01	63503403	TY	A	G		185	22	172	77	1.07932e-07	3e-05	PGSC0003DMG400026006	70510300..70516700	3-phosphoshikimate 1-carboxyvinyltransferase, chloroplastic		15	4
chr01	63503403	TSY	A	G		166	29	169	80	2.30761e-05	0.00306	PGSC0003DMG400026006	70510300..70516700	3-phosphoshikimate 1-carboxyvinyltransferase, chloroplastic		15	4
chr01	63503447	TY	C	A		155	16	156	68	2.448e-07	5e-05	PGSC0003DMG400026006	70510300..70516700	3-phosphoshikimate 1-carboxyvinyltransferase, chloroplastic		15	4
chr01	63503447	TSY	C	A		137	22	155	68	0.000140645	0.01012	PGSC0003DMG400026006	70510300..70516700	3-phosphoshikimate 1-carboxyvinyltransferase, chloroplastic		15	4
chr01	63684660	TY	T	C		148	21	165	60	0.000616502	0.01423	PGSC0003DMG400012776	70693700..70702200	Nucleotide binding protein		15	4
chr01	63684680	TY	G	T	E/D	156	27	158	61	0.00161928	0.02773	PGSC0003DMG400012776	70693700..70702200	Nucleotide binding protein		15	4
chr01	63684753	TY	G	A	V/I	201	26	167	64	1.16779e-05	0.00083	PGSC0003DMG400012776	70693700..70702200	Nucleotide binding protein		15	4
chr01	63684753	TSY	G	A	V/I	202	27	174	56	0.00062554	0.02662	PGSC0003DMG400012776	70693700..70702200	Nucleotide binding protein		15	4
chr01	63690134	TSC	T	G		7	21	12	4	0.0018419	0.02451	PGSC0003DMG400012776	70693700..70702200	Nucleotide binding protein		15	4
chr01	63690152	TSC	C	T		8	25	14	6	0.00157012	0.02186	PGSC0003DMG400012776	70693700..70702200	Nucleotide binding protein		15	4
chr01	63690158	TSC	T	C		8	24	14	6	0.00334913	0.03731	PGSC0003DMG400012776	70693700..70702200	Nucleotide binding protein		15	4
chr01	63690267	TSC	A	G		46	4	15	28	4.36497e-09	0	PGSC0003DMG400012776	70693700..70702200	Nucleotide binding protein		15	4
chr01	63690335	TSC	T	G		19	51	30	17	0.000116241	0.0033	PGSC0003DMG400012776	70693700..70702200	Nucleotide binding protein		15	4
chr01	63746102	TSC	T	A		5	3	0	11	0.00481596	0.04818	PGSC0003DMG400012760	70751600..70756900	DNA binding protein		15	4
chr01	63746151	TSC	A	T		9	3	0	23	3.11582e-06	0.00022	PGSC0003DMG400012760	70751600..70756900	DNA binding protein		15	4
chr01	63746151	TY	A	T		0	14	19	15	0.000204874	0.00659	PGSC0003DMG400012760	70751600..70756900	DNA binding protein		15	4
chr01	63746191	TSC	A	G		7	3	0	18	0.000101348	0.00299	PGSC0003DMG400012760	70751600..70756900	DNA binding protein		15	4
chr01	63746191	TY	A	G		0	11	14	13	0.00255383	0.03779	PGSC0003DMG400012760	70751600..70756900	DNA binding protein		15	4
chr01	63812288	TY	A	G		139	7	148	26	0.00294624	0.04165	PGSC0003DMG400012755	70817700..70824100	Pentatricopeptide repeat-containing protein		15	4
chr01	63812288	TSY	A	G		111	3	118	21	0.000847818	0.03231	PGSC0003DMG400012755	70817700..70824100	Pentatricopeptide repeat-containing protein		15	4
chr01	63812446	TY	C	T		1	45	22	37	7.06229e-06	0.00057	PGSC0003DMG400012755	70817700..70824100	Pentatricopeptide repeat-containing protein		15	4
chr01	63812446	TSY	C	T		2	35	22	18	1.57861e-06	0.00049	PGSC0003DMG400012755	70817700..70824100	Pentatricopeptide repeat-containing protein		15	4
chr01	64001524	TY	C	G		98	14	107	45	0.000966282	0.01942	PGSC0003DMG400027772	71011400..71016900	Cleavage and polyadenylation specificity factor		15	4
chr01	64001524	TSY	C	G		91	9	77	47	4.07342e-07	0.00019	PGSC0003DMG400027772	71011400..71016900	Cleavage and polyadenylation specificity factor		15	4
chr01	64001538	TSY	T	A		88	10	80	43	1.45819e-05	0.00223	PGSC0003DMG400027772	71011400..71016900	Cleavage and polyadenylation specificity factor		15	4
chr01	64076376	TY	A	G		172	17	193	50	0.00118146	0.02233	PGSC0003DMG400027768	71084800..71091200	Cop11 protein		15	4
chr01	64076376	TSY	A	G		170	10	184	58	1.82627e-07	0.00011	PGSC0003DMG400027768	71084800..71091200	Cop11 protein		15	4
chr01	64077110	TY	T	C		32	55	12	79	0.000428229	0.01103	PGSC0003DMG400027768	71084800..71091200	Cop11 protein		15	4
chr01	64194644	TY	T	C		200	16	189	53	1.23293e-05	0.00086	PGSC0003DMG400017052	71203590..71208350	Splicing factor		15	4
chr01	64194780	TY	T	G		161	33	153	68	0.00128291	0.02362	PGSC0003DMG400017052	71203590..71208350	Splicing factor		15	4
chr01	64257174	TY	T	G		118	59	91	159	8.30906e-10	0	PGSC0003DMG400000001	71266900..71269540	Adenosine 3'-phospho 5'-phosphosulfate transporter		15	4
chr01	64257174	TSY	T	G		95	51	84	154	1.80037e-08	2e-05	PGSC0003DMG400000001	71266900..71269540	Adenosine 3'-phospho 5'-phosphosulfate transporter		15	4
chr01	64257175	TY	A	C		117	58	91	159	7.28077e-10	0	PGSC0003DMG400000001	71266900..71269540	Adenosine 3'-phospho 5'-phosphosulfate transporter		15	4
chr01	64257175	TSY	A	C		94	51	85	157	1.83094e-08	2e-05	PGSC0003DMG400000001	71266900..71269540	Adenosine 3'-phospho 5'-phosphosulfate transporter		15	4
chr01	64257280	TSC	A	G		179	4	148	16	0.00440861	0.04528	PGSC0003DMG400000001	71266900..71269540	Adenosine 3'-phospho 5'-phosphosulfate transporter		15	4
chr01	64257365	TY	C	T		98	13	88	38	0.000773121	0.01665	PGSC0003DMG400000001	71266900..71269540	Adenosine 3'-phospho 5'-phosphosulfate transporter		15	4
chr01	64257388	TY	C	A		70	23	61	52	0.00215555	0.0337	PGSC0003DMG400000001	71266900..71269540	Adenosine 3'-phospho 5'-phosphosulfate transporter		15	4
chr01	64266624	TY	C	A		25	8	22	31	0.00347104	0.04651	PGSC0003DMG400000131	71271100..71279700	SET domain-containing protein		15	4
chr01	64266659	TY	C	G		51	18	37	51	8.95207e-05	0.00365	PGSC0003DMG400000131	71271100..71279700	SET domain-containing protein		15	4
chr01	64266690	TY	T	C		70	28	54	74	1.43063e-05	0.00097	PGSC0003DMG400000131	71271100..71279700	SET domain-containing protein		15	4
chr01	64266690	TSY	T	C		54	23	47	67	0.000111999	0.00872	PGSC0003DMG400000131	71271100..71279700	SET domain-containing protein		15	4
chr01	64266702	TSC	T	A		102	5	70	22	0.000108948	0.00315	PGSC0003DMG400000131	71271100..71279700	SET domain-containing protein		15	4
chr01	64266738	TY	T	C		148	45	118	130	4.68998e-10	0	PGSC0003DMG400000131	71271100..71279700	SET domain-containing protein		15	4
chr01	64266738	TSY	T	C		116	42	113	134	4.16248e-08	4e-05	PGSC0003DMG400000131	71271100..71279700	SET domain-containing protein		15	4
chr01	64266742	TY	C	A		179	21	152	97	2.3676e-12	0	PGSC0003DMG400000131	71271100..71279700	SET domain-containing protein		15	4
chr01	64266742	TSY	C	A		131	31	154	95	4.6358e-05	0.00486	PGSC0003DMG400000131	71271100..71279700	SET domain-containing protein		15	4
chr01	64266780	TY	T	C		124	49	98	119	1.40441e-07	3e-05	PGSC0003DMG400000131	71271100..71279700	SET domain-containing protein		15	4
chr01	64266780	TSY	T	C		101	42	93	116	1.40712e-06	0.00045	PGSC0003DMG400000131	71271100..71279700	SET domain-containing protein		15	4
chr01	64266784	TSC	A	G		175	14	143	37	0.000262479	0.00601	PGSC0003DMG400000131	71271100..71279700	SET domain-containing protein		15	4
chr01	64266821	TY	G	A		154	52	123	92	0.000204847	0.00659	PGSC0003DMG400000131	71271100..71279700	SET domain-containing protein		15	4
chr01	64266821	TSY	G	A		129	63	92	92	0.000800395	0.03115	PGSC0003DMG400000131	71271100..71279700	SET domain-containing protein		15	4
chr01	64266864	TY	T	C		182	67	135	115	1.15312e-05	0.00082	PGSC0003DMG400000131	71271100..71279700	SET domain-containing protein		15	4
chr01	64266864	TSY	T	C		160	86	122	128	0.000287051	0.01615	PGSC0003DMG400000131	71271100..71279700	SET domain-containing protein		15	4
chr01	64266899	TY	T	C	I/V	130	54	99	91	0.000296043	0.00852	PGSC0003DMG400000131	71271100..71279700	SET domain-containing protein		15	4
chr01	64266899	TSY	T	C	I/V	121	66	92	99	0.00131496	0.0426	PGSC0003DMG400000131	71271100..71279700	SET domain-containing protein		15	4
chr01	64266974	TY	T	A		53	16	52	44	0.00319374	0.04397	PGSC0003DMG400000131	71271100..71279700	SET domain-containing protein		15	4
chr01	64341026	TY	A	T	L/F	72	45	77	109	0.000915101	0.01871	PGSC0003DMG401000006	71350800..71357200	DNA binding protein		15	4
chr01	64341026	TSY	A	T	L/F	69	39	60	91	0.000151465	0.0106	PGSC0003DMG401000006	71350800..71357200	DNA binding protein		15	4
chr01	64341068	TY	C	T		143	6	202	48	7.19738e-06	0.00058	PGSC0003DMG401000006	71350800..71357200	DNA binding protein		15	4
chr01	64341068	TSY	C	T		139	13	167	45	0.00125941	0.04142	PGSC0003DMG401000006	71350800..71357200	DNA binding protein		15	4
chr01	64341103	TSC	A	G	N/S	196	48	218	25	0.00497789	0.04931	PGSC0003DMG401000006	71350800..71357200	DNA binding protein		15	4
chr01	64341103	TY	A	G	N/S	230	14	199	44	2.15492e-05	0.00131	PGSC0003DMG401000006	71350800..71357200	DNA binding protein		15	4
chr01	64341103	TSY	A	G	N/S	223	20	192	52	6.08246e-05	0.00587	PGSC0003DMG401000006	71350800..71357200	DNA binding protein		15	4
chr01	64341125	TSC	G	A		199	39	221	19	0.00499551	0.04942	PGSC0003DMG401000006	71350800..71357200	DNA binding protein		15	4
chr01	64341125	TSY	G	A		215	14	189	44	3.48178e-05	0.00401	PGSC0003DMG401000006	71350800..71357200	DNA binding protein		15	4
chr01	64341128	TY	A	C		229	13	193	42	2.18909e-05	0.00132	PGSC0003DMG401000006	71350800..71357200	DNA binding protein		15	4
chr01	64341128	TSY	A	C		213	17	191	45	0.000205464	0.01293	PGSC0003DMG401000006	71350800..71357200	DNA binding protein		15	4
chr01	64341212	TSC	T	C		208	40	231	18	0.00207076	0.02664	PGSC0003DMG401000006	71350800..71357200	DNA binding protein		15	4
chr01	64341212	TY	T	C		236	14	211	38	0.000400736	0.01054	PGSC0003DMG401000006	71350800..71357200	DNA binding protein		15	4
chr01	64341239	TY	T	C		123	6	130	27	0.00125909	0.02331	PGSC0003DMG401000006	71350800..71357200	DNA binding protein		15	4
chr01	64341251	TSC	A	G		127	33	117	11	0.00499753	0.04944	PGSC0003DMG401000006	71350800..71357200	DNA binding protein		15	4
chr01	64341251	TY	A	G		132	7	141	30	0.000688552	0.01536	PGSC0003DMG401000006	71350800..71357200	DNA binding protein		15	4
chr01	64341287	TSC	C	T		147	39	131	10	0.000493592	0.00952	PGSC0003DMG401000006	71350800..71357200	DNA binding protein		15	4
chr01	64341287	TY	C	T		168	12	181	38	0.00131759	0.02406	PGSC0003DMG401000006	71350800..71357200	DNA binding protein		15	4
chr01	64439757	TY	T	C		149	51	135	115	8.86124e-06	0.00067	PGSC0003DMG400000010	71443600..71451200	Glycosyltransferase		15	4
chr01	64439760	TY	G	A		149	52	134	115	9.52827e-06	0.00071	PGSC0003DMG400000010	71443600..71451200	Glycosyltransferase		15	4
chr01	64439919	TY	T	A		61	14	66	42	0.00351283	0.04687	PGSC0003DMG400000010	71443600..71451200	Glycosyltransferase		15	4
chr01	64754090	TSY	C	A		82	10	106	44	0.000765991	0.0303	PGSC0003DMG400000255	71763250..71767270	Conserved gene of unknown function		15	4
chr01	64754104	TY	T	G		95	20	110	78	1.41169e-05	0.00096	PGSC0003DMG400000255	71763250..71767270	Conserved gene of unknown function		15	4
chr01	64754104	TSY	T	G		79	25	87	68	0.00145149	0.04537	PGSC0003DMG400000255	71763250..71767270	Conserved gene of unknown function		15	4
chr01	64754135	TY	C	T		101	12	135	53	0.000272987	0.00805	PGSC0003DMG400000255	71763250..71767270	Conserved gene of unknown function		15	4
chr01	64754135	TSY	C	T		96	9	106	46	2.22517e-05	0.00299	PGSC0003DMG400000255	71763250..71767270	Conserved gene of unknown function		15	4
chr01	64754153	TY	C	T		209	31	190	58	0.00326566	0.04462	PGSC0003DMG400000255	71763250..71767270	Conserved gene of unknown function		15	4
chr01	64754153	TSY	C	T		197	19	190	58	2.89114e-05	0.00355	PGSC0003DMG400000255	71763250..71767270	Conserved gene of unknown function		15	4
chr01	64754167	TY	C	T		213	29	188	57	0.00126964	0.02345	PGSC0003DMG400000255	71763250..71767270	Conserved gene of unknown function		15	4
chr01	64754167	TSY	C	T		200	20	187	58	3.269e-05	0.00385	PGSC0003DMG400000255	71763250..71767270	Conserved gene of unknown function		15	4
chr01	64754198	TSY	C	T		171	18	173	49	0.000725679	0.02932	PGSC0003DMG400000255	71763250..71767270	Conserved gene of unknown function		15	4
chr01	64755525	TSC	C	T		19	7	3	18	9.02493e-05	0.00273	PGSC0003DMG400000255	71763250..71767270	Conserved gene of unknown function		15	4
chr01	64755570	TSC	C	G		15	6	3	18	0.000432977	0.00865	PGSC0003DMG400000255	71763250..71767270	Conserved gene of unknown function		15	4
chr01	64760697	TY	G	A		65	20	71	54	0.00343123	0.04615	PGSC0003DMG400000256	71769930..71773010	Gene of unknown function		15	4
chr01	64760703	TY	A	G		77	18	90	53	0.00364418	0.04799	PGSC0003DMG400000256	71769930..71773010	Gene of unknown function		15	4
chr01	64760706	TY	A	G		50	46	41	99	0.000625713	0.01438	PGSC0003DMG400000256	71769930..71773010	Gene of unknown function		15	4
chr01	64760715	TY	T	G		90	16	105	48	0.00325351	0.04451	PGSC0003DMG400000256	71769930..71773010	Gene of unknown function		15	4
chr01	64760715	TSY	T	G		84	10	88	43	0.000107498	0.0085	PGSC0003DMG400000256	71769930..71773010	Gene of unknown function		15	4
chr01	64760728	TY	G	A		98	18	116	53	0.00223953	0.0346	PGSC0003DMG400000256	71769930..71773010	Gene of unknown function		15	4
chr01	64760728	TSY	G	A		91	13	95	45	0.000413866	0.02046	PGSC0003DMG400000256	71769930..71773010	Gene of unknown function		15	4
chr01	64760730	TY	T	C		70	49	57	114	2.3151e-05	0.00138	PGSC0003DMG400000256	71769930..71773010	Gene of unknown function		15	4
chr01	64760730	TSY	T	C		54	50	45	97	0.0016111	0.04832	PGSC0003DMG400000256	71769930..71773010	Gene of unknown function		15	4
chr01	64760745	TSY	G	A		92	13	107	45	0.00131927	0.04269	PGSC0003DMG400000256	71769930..71773010	Gene of unknown function		15	4
chr01	64760821	TSC	G	A		208	31	157	53	0.00102062	0.01603	PGSC0003DMG400000256	71769930..71773010	Gene of unknown function		15	4
chr01	64760821	TSY	G	A		191	28	167	71	8.56197e-06	0.00156	PGSC0003DMG400000256	71769930..71773010	Gene of unknown function		15	4
chr01	64760847	TSC	G	A		190	28	139	47	0.00193289	0.02537	PGSC0003DMG400000256	71769930..71773010	Gene of unknown function		15	4
chr01	64760847	TSY	G	A		161	24	153	67	2.52888e-05	0.00326	PGSC0003DMG400000256	71769930..71773010	Gene of unknown function		15	4
chr01	64760897	TSC	T	C		148	20	110	56	1.9647e-06	0.00015	PGSC0003DMG400000256	71769930..71773010	Gene of unknown function		15	4
chr01	64760998	TSY	T	C		88	17	90	50	0.000805672	0.03127	PGSC0003DMG400000256	71769930..71773010	Gene of unknown function		15	4
chr01	64761131	TSC	G	A		224	16	159	51	1.36162e-07	2e-05	PGSC0003DMG400000256	71769930..71773010	Gene of unknown function		15	4
chr01	64761161	TSC	C	T		187	19	137	42	0.000145655	0.0039	PGSC0003DMG400000256	71769930..71773010	Gene of unknown function		15	4
chr01	64761171	TY	T	C		139	51	125	94	0.00088522	0.01828	PGSC0003DMG400000256	71769930..71773010	Gene of unknown function		15	4
chr01	64761171	TSY	T	C		109	40	97	93	3.41961e-05	0.00396	PGSC0003DMG400000256	71769930..71773010	Gene of unknown function		15	4
chr01	64761231	TY	T	C		201	49	166	83	0.000550997	0.01318	PGSC0003DMG400000256	71769930..71773010	Gene of unknown function		15	4
chr01	64761231	TSY	T	C		204	43	168	82	8.16315e-05	0.00706	PGSC0003DMG400000256	71769930..71773010	Gene of unknown function		15	4
chr01	64801576	TSC	G	A		31	188	3	184	2.37621e-06	0.00018	PGSC0003DMG401000020	71807800..71817300	NAD-dependent malic enzyme 59 kDa isoform, mitochondrial		15	4
chr01	64801576	TY	G	A		3	175	23	197	0.000340206	0.00941	PGSC0003DMG401000020	71807800..71817300	NAD-dependent malic enzyme 59 kDa isoform, mitochondrial		15	4
chr01	64801654	TSC	C	T		41	85	10	67	0.00245164	0.03003	PGSC0003DMG401000020	71807800..71817300	NAD-dependent malic enzyme 59 kDa isoform, mitochondrial		15	4
chr01	64801654	TY	C	T		9	83	36	77	0.0001532	0.00535	PGSC0003DMG401000020	71807800..71817300	NAD-dependent malic enzyme 59 kDa isoform, mitochondrial		15	4
chr01	64934501	TY	C	T		35	88	99	110	0.000767932	0.01657	PGSC0003DMG400000157	71942360..71946090	Remorin 2		15	4
chr01	64934549	TY	G	A		134	9	134	36	0.000163053	0.0056	PGSC0003DMG400000157	71942360..71946090	Remorin 2		15	4
chr01	64934549	TSY	G	A		122	9	108	30	0.000500798	0.02311	PGSC0003DMG400000157	71942360..71946090	Remorin 2		15	4
chr01	64934593	TY	A	T		30	157	108	103	7.56778e-14	0	PGSC0003DMG400000157	71942360..71946090	Remorin 2		15	4
chr01	64934593	TSY	A	T		55	111	87	85	0.00137771	0.04384	PGSC0003DMG400000157	71942360..71946090	Remorin 2		15	4
chr01	64934664	TY	T	C		84	7	77	27	0.00107332	0.02088	PGSC0003DMG400000157	71942360..71946090	Remorin 2		15	4
chr01	64934664	TSY	T	C		81	6	57	23	0.000199894	0.01271	PGSC0003DMG400000157	71942360..71946090	Remorin 2		15	4
chr01	64966543	TY	A	G	Q/R	151	62	215	14	7.55732e-11	0	PGSC0003DMG401000029	71971600..71978600	Synaptotagmin (Calcium sensor)		15	4
chr01	64966543	TSY	A	G	Q/R	138	49	210	15	4.78381e-08	4e-05	PGSC0003DMG401000029	71971600..71978600	Synaptotagmin (Calcium sensor)		15	4
chr01	65140612	TSC	C	T		196	20	105	40	1.00958e-05	0.00053	PGSC0003DMG400000040	72149270..72151490	Rop guanine nucleotide exchange factor
chr01	65568460	TSC	G	A		55	94	19	98	0.00018709	0.00468	PGSC0003DMG400000188	72574300..72579900	Bmru protein		16
chr01	65568460	TY	G	A		14	111	72	113	3.78264e-08	1e-05	PGSC0003DMG400000188	72574300..72579900	Bmru protein		16
chr01	65568501	TSC	T	C		26	95	6	92	0.0017377	0.02353	PGSC0003DMG400000188	72574300..72579900	Bmru protein		16
chr01	65568501	TY	T	C		4	99	33	115	2.2902e-05	0.00137	PGSC0003DMG400000188	72574300..72579900	Bmru protein		16
chr01	65568623	TSC	G	T		23	99	3	84	0.000597951	0.01092	PGSC0003DMG400000188	72574300..72579900	Bmru protein		16
chr01	65757304	TY	C	T		63	25	71	73	0.000989139	0.01975	PGSC0003DMG400000197	72765540..72770320	Structural maintenance of chromosome 1 protein		16
chr01	65757391	TSC	A	T		172	65	198	21	1.14699e-06	0.0001	PGSC0003DMG400000197	72765540..72770320	Structural maintenance of chromosome 1 protein		16
chr01	65757391	TY	A	T		173	22	156	78	4.79748e-08	1e-05	PGSC0003DMG400000197	72765540..72770320	Structural maintenance of chromosome 1 protein		16
chr01	65757500	TSY	G	A		196	28	175	67	5.00964e-05	0.00515	PGSC0003DMG400000197	72765540..72770320	Structural maintenance of chromosome 1 protein		16
chr01	65812325	TY	T	G		130	12	128	43	9.27815e-05	0.00375	PGSC0003DMG400000077	72821600..72827100	Alpha 1,3-xylosyltransferase		16
chr01	65812325	TSY	T	G		111	10	109	34	0.000808741	0.03135	PGSC0003DMG400000077	72821600..72827100	Alpha 1,3-xylosyltransferase		16
chr01	65812477	TSC	A	C		98	39	119	10	1.3023e-05	0.00065	PGSC0003DMG400000077	72821600..72827100	Alpha 1,3-xylosyltransferase		16
chr01	65812477	TY	A	C		106	20	115	58	0.000788968	0.01688	PGSC0003DMG400000077	72821600..72827100	Alpha 1,3-xylosyltransferase		16
chr01	65812477	TSY	A	C		86	17	94	52	0.000921175	0.03399	PGSC0003DMG400000077	72821600..72827100	Alpha 1,3-xylosyltransferase		16
chr01	65964823	TSC	T	C	S/P	39	90	2	85	3.09889e-08	1e-05	PGSC0003DMG400042564	72974510..72977930	Gene of unknown function		16
chr01	66009489	TSC	C	T		21	69	4	83	0.000385649	0.00795	PGSC0003DMG400000204	73015930..73019840	Thylakoid membrane phosphoprotein 14 kDa, chloroplast		16
chr01	66009489	TY	C	T		4	60	26	73	0.00155123	0.02692	PGSC0003DMG400000204	73015930..73019840	Thylakoid membrane phosphoprotein 14 kDa, chloroplast		16
chr01	66009518	TSC	A	T		129	68	95	99	0.00107489	0.01662	PGSC0003DMG400000204	73015930..73019840	Thylakoid membrane phosphoprotein 14 kDa, chloroplast		16
chr01	66009518	TY	A	T		64	76	167	64	5.34194e-07	8e-05	PGSC0003DMG400000204	73015930..73019840	Thylakoid membrane phosphoprotein 14 kDa, chloroplast		16
chr01	66009518	TSY	A	T		55	50	141	48	0.000165279	0.01125	PGSC0003DMG400000204	73015930..73019840	Thylakoid membrane phosphoprotein 14 kDa, chloroplast		16
chr01	66009550	TSC	C	A		30	147	9	171	0.000300846	0.00664	PGSC0003DMG400000204	73015930..73019840	Thylakoid membrane phosphoprotein 14 kDa, chloroplast		16
chr01	66009550	TY	C	A		4	127	42	158	1.10956e-06	0.00015	PGSC0003DMG400000204	73015930..73019840	Thylakoid membrane phosphoprotein 14 kDa, chloroplast		16
chr01	66009607	TY	A	G	S/P	226	5	227	22	0.00136241	0.02462	PGSC0003DMG400000204	73015930..73019840	Thylakoid membrane phosphoprotein 14 kDa, chloroplast		16
chr01	66037529	TY	C	T		3	102	54	141	1.0811e-08	0	PGSC0003DMG400000088	73044600..73051100	TAF-2 (Transcription initiation factor subunit 2)		16
chr01	66037529	TSY	C	T		10	91	46	115	0.000316436	0.01717	PGSC0003DMG400000088	73044600..73051100	TAF-2 (Transcription initiation factor subunit 2)		16
chr01	66037562	TSC	G	T		112	42	56	58	0.000116478	0.00331	PGSC0003DMG400000088	73044600..73051100	TAF-2 (Transcription initiation factor subunit 2)		16
chr01	66160451	TY	A	G	Q/R	80	4	93	29	0.000179763	0.00601	PGSC0003DMG401000095	73169390..73173120	Jasmonic acid-amino acid-conjugating enzyme		16
chr01	66160524	TSC	A	G		107	143	52	196	1.80472e-07	3e-05	PGSC0003DMG401000095	73169390..73173120	Jasmonic acid-amino acid-conjugating enzyme		16
chr01	66160533	TSC	T	C		203	46	245	5	1.86186e-10	0	PGSC0003DMG401000095	73169390..73173120	Jasmonic acid-amino acid-conjugating enzyme		16
chr01	66160533	TY	T	C		235	15	197	52	7.86775e-07	0.00011	PGSC0003DMG401000095	73169390..73173120	Jasmonic acid-amino acid-conjugating enzyme		16
chr01	66160533	TSY	T	C		219	27	186	63	3.90669e-05	0.00434	PGSC0003DMG401000095	73169390..73173120	Jasmonic acid-amino acid-conjugating enzyme		16
chr01	66160554	TSC	G	A		102	145	51	192	1.53873e-06	0.00013	PGSC0003DMG401000095	73169390..73173120	Jasmonic acid-amino acid-conjugating enzyme		16
chr01	66160572	TY	C	T		211	13	181	46	5.01233e-06	0.00045	PGSC0003DMG401000095	73169390..73173120	Jasmonic acid-amino acid-conjugating enzyme		16
chr01	66160572	TSY	C	T		197	23	174	54	0.000248439	0.01468	PGSC0003DMG401000095	73169390..73173120	Jasmonic acid-amino acid-conjugating enzyme		16
chr01	66160648	TY	T	C		21	30	5	77	1.68688e-06	0.0002	PGSC0003DMG401000095	73169390..73173120	Jasmonic acid-amino acid-conjugating enzyme		16
chr01	66160675	TY	G	C		25	31	5	91	7.26892e-09	0	PGSC0003DMG401000095	73169390..73173120	Jasmonic acid-amino acid-conjugating enzyme		16
chr01	66160676	TY	G	A		22	35	4	92	7.50023e-08	2e-05	PGSC0003DMG401000095	73169390..73173120	Jasmonic acid-amino acid-conjugating enzyme		16
chr01	66160687	TY	T	C		20	29	5	79	1.31696e-06	0.00017	PGSC0003DMG401000095	73169390..73173120	Jasmonic acid-amino acid-conjugating enzyme		16
chr01	66160689	TY	G	A		19	28	5	78	2.43718e-06	0.00026	PGSC0003DMG401000095	73169390..73173120	Jasmonic acid-amino acid-conjugating enzyme		16
chr01	66160741	TY	A	T		12	12	2	42	2.16654e-05	0.00131	PGSC0003DMG401000095	73169390..73173120	Jasmonic acid-amino acid-conjugating enzyme		16
chr01	66189614	TY	A	G		33	164	18	229	0.00251032	0.03736	PGSC0003DMG402000097	73196770..73200270	Conserved gene of unknown function		16
chr01	66189662	TY	T	C		26	128	12	212	0.000385159	0.01025	PGSC0003DMG402000097	73196770..73200270	Conserved gene of unknown function		16
chr01	66189734	TSC	C	T		10	239	28	220	0.00229134	0.02863	PGSC0003DMG402000097	73196770..73200270	Conserved gene of unknown function		16
chr01	66189734	TY	C	T		56	188	20	229	5.07774e-06	0.00045	PGSC0003DMG402000097	73196770..73200270	Conserved gene of unknown function		16
chr01	66195727	TSC	G	A		105	23	70	38	0.0029208	0.03392	PGSC0003DMG400035976	73205390..73206960	Glycosyltransferase		16
chr01	66195845	TY	T	C		36	193	7	220	3.34232e-06	0.00033	PGSC0003DMG400035976	73205390..73206960	Glycosyltransferase		16
chr01	66831886	TSC	C	A		33	21	49	3	4.56996e-05	0.00166	PGSC0003DMG400000127	73837900..73843900	Cytochrome b5 isoform Cb5-A
chr01	66831975	TY	T	G		104	51	120	112	0.00322485	0.04424	PGSC0003DMG400000127	73837900..73843900	Cytochrome b5 isoform Cb5-A
chr01	66831977	TY	G	A		142	15	182	53	0.000981133	0.01963	PGSC0003DMG400000127	73837900..73843900	Cytochrome b5 isoform Cb5-A
chr01	66832020	TY	C	A		95	49	97	100	0.00278444	0.04009	PGSC0003DMG400000127	73837900..73843900	Cytochrome b5 isoform Cb5-A
chr01	66832066	TY	A	G		101	6	82	43	3.62396e-08	1e-05	PGSC0003DMG400000127	73837900..73843900	Cytochrome b5 isoform Cb5-A
chr01	66832066	TSY	A	G		94	11	71	39	1.90098e-05	0.00267	PGSC0003DMG400000127	73837900..73843900	Cytochrome b5 isoform Cb5-A
chr01	66832076	TY	T	A		105	5	90	43	1.44838e-08	1e-05	PGSC0003DMG400000127	73837900..73843900	Cytochrome b5 isoform Cb5-A
chr01	66832076	TSY	T	A		100	11	76	38	2.04218e-05	0.00282	PGSC0003DMG400000127	73837900..73843900	Cytochrome b5 isoform Cb5-A
chr01	66832164	TSY	A	C		42	24	66	10	0.00153543	0.04697	PGSC0003DMG400000127	73837900..73843900	Cytochrome b5 isoform Cb5-A
chr01	66849662	TY	G	A		215	6	213	25	0.00119913	0.02255	PGSC0003DMG400000244	73857810..73860560	Cytochrome P450
chr01	66849721	TY	G	T		176	3	196	30	1.13082e-05	0.00081	PGSC0003DMG400000244	73857810..73860560	Cytochrome P450
chr01	67417246	TY	G	T	T/K	80	21	118	7	0.000878861	0.01819	PGSC0003DMG400003293	74420100..74430100	Protein regulator of cytokinesis
chr01	67417321	TSY	G	A	A/V	109	43	154	18	5.38349e-05	0.0054	PGSC0003DMG400003293	74420100..74430100	Protein regulator of cytokinesis
chr01	67419414	TY	A	T		63	27	103	13	0.00119557	0.02251	PGSC0003DMG400003293	74420100..74430100	Protein regulator of cytokinesis
chr01	67419414	TSY	A	T		48	33	86	12	2.26434e-05	0.00302	PGSC0003DMG400003293	74420100..74430100	Protein regulator of cytokinesis
chr01	67419539	TSY	C	T		23	20	38	6	0.00100062	0.03582	PGSC0003DMG400003293	74420100..74430100	Protein regulator of cytokinesis
chr01	67419997	TSY	A	G		129	82	202	45	1.19987e-06	0.0004	PGSC0003DMG400003293	74420100..74430100	Protein regulator of cytokinesis
chr01	67420100	TSY	C	G		46	28	99	12	1.91235e-05	0.00268	PGSC0003DMG400003293	74420100..74430100	Protein regulator of cytokinesis
chr01	67561469	TSC	A	G		3	21	12	5	0.000228675	0.00543	PGSC0003DMG400027506	74566300..74583200	Cation-transporting atpase 13a1		17
chr01	67561469	TY	A	G		17	15	6	37	0.000378633	0.01013	PGSC0003DMG400027506	74566300..74583200	Cation-transporting atpase 13a1		17
chr01	67561516	TSC	C	T		7	27	20	5	6.60461e-06	0.00039	PGSC0003DMG400027506	74566300..74583200	Cation-transporting atpase 13a1		17
chr01	67561516	TY	C	T		19	15	8	39	0.000341359	0.00943	PGSC0003DMG400027506	74566300..74583200	Cation-transporting atpase 13a1		17
chr01	67561573	TSC	T	C		36	9	5	27	2.86471e-08	1e-05	PGSC0003DMG400027506	74566300..74583200	Cation-transporting atpase 13a1		17
chr01	67561573	TY	T	C		18	26	50	10	9.33771e-06	0.0007	PGSC0003DMG400027506	74566300..74583200	Cation-transporting atpase 13a1		17
chr01	67970749	TY	T	C		200	13	207	40	0.000691858	0.01541	PGSC0003DMG400019438	74978700..74980960	Prenylated Rab acceptor protein		17
chr01	67970892	TY	G	A		198	12	200	49	7.4336e-06	0.00059	PGSC0003DMG400019438	74978700..74980960	Prenylated Rab acceptor protein		17
chr01	67987970	TSC	A	G		153	86	70	119	4.04151e-08	1e-05	PGSC0003DMG400019458	74996190..74998350	Gene of unknown function		17
chr01	67988015	TSC	G	A		192	27	153	4	0.000483104	0.00937	PGSC0003DMG400019458	74996190..74998350	Gene of unknown function		17
chr01	67988025	TSC	T	C		131	71	62	91	5.93887e-06	0.00036	PGSC0003DMG400019458	74996190..74998350	Gene of unknown function		17
chr01	67988085	TSC	T	A		179	23	206	6	0.000790515	0.01334	PGSC0003DMG400019458	74996190..74998350	Gene of unknown function		17
chr01	67988116	TSC	T	C		180	24	200	7	0.00132093	0.01927	PGSC0003DMG400019458	74996190..74998350	Gene of unknown function		17
chr01	67988167	TSC	C	A		83	46	52	64	0.00301724	0.03471	PGSC0003DMG400019458	74996190..74998350	Gene of unknown function		17
chr01	68070984	TY	G	C	A/P	112	48	109	102	0.000415525	0.01081	PGSC0003DMG400019454	75077910..75081690	GDP-mannose 3',5'-epimerase		17
chr01	68071001	TY	A	T		106	45	121	117	0.000209977	0.0067	PGSC0003DMG400019454	75077910..75081690	GDP-mannose 3',5'-epimerase		17
chr01	68071004	TY	C	T		191	23	183	62	6.16231e-05	0.0028	PGSC0003DMG400019454	75077910..75081690	GDP-mannose 3',5'-epimerase		17
chr01	68071025	TSC	C	T		158	91	187	54	0.000740212	0.01272	PGSC0003DMG400019454	75077910..75081690	GDP-mannose 3',5'-epimerase		17
chr01	68071025	TY	C	T		187	61	147	100	0.000179101	0.006	PGSC0003DMG400019454	75077910..75081690	GDP-mannose 3',5'-epimerase		17
chr01	68071040	TY	A	G		220	27	183	58	0.000128463	0.00472	PGSC0003DMG400019454	75077910..75081690	GDP-mannose 3',5'-epimerase		17
chr01	68071112	TY	T	A		159	18	167	65	6.44908e-06	0.00054	PGSC0003DMG400019454	75077910..75081690	GDP-mannose 3',5'-epimerase		17
chr01	68071114	TSC	C	G		205	27	184	4	0.000127507	0.00354	PGSC0003DMG400019454	75077910..75081690	GDP-mannose 3',5'-epimerase		17
chr01	68464699	TSC	T	C		14	8	2	18	0.000441664	0.00878	PGSC0003DMG400022509	75474530..75477100	DNA-damage-repair/toleration protein DRT102		17
chr01	68464781	TSC	C	T		101	15	56	29	0.000482595	0.00936	PGSC0003DMG400022509	75474530..75477100	DNA-damage-repair/toleration protein DRT102		17
chr01	68464781	TY	C	T		58	39	115	29	0.000812991	0.01721	PGSC0003DMG400022509	75474530..75477100	DNA-damage-repair/toleration protein DRT102		17
chr01	68464799	TSC	C	A		121	19	67	37	9.51877e-05	0.00285	PGSC0003DMG400022509	75474530..75477100	DNA-damage-repair/toleration protein DRT102		17
chr01	68464799	TY	C	A		74	43	149	36	0.00119778	0.02254	PGSC0003DMG400022509	75474530..75477100	DNA-damage-repair/toleration protein DRT102		17
chr01	68464893	TY	G	A	D/N	109	4	142	27	0.000802722	0.01707	PGSC0003DMG400022509	75474530..75477100	DNA-damage-repair/toleration protein DRT102		17
chr01	68464982	TSY	T	C		169	7	206	31	0.00164629	0.04898	PGSC0003DMG400022509	75474530..75477100	DNA-damage-repair/toleration protein DRT102		17
chr01	68464998	TSY	C	A	P/T	174	7	208	39	5.55529e-05	0.00552	PGSC0003DMG400022509	75474530..75477100	DNA-damage-repair/toleration protein DRT102		17
chr01	68465007	TY	G	A	A/T	130	42	216	19	8.75666e-06	0.00067	PGSC0003DMG400022509	75474530..75477100	DNA-damage-repair/toleration protein DRT102		17
chr01	68465007	TSY	G	A	A/T	123	49	216	17	1.98557e-08	2e-05	PGSC0003DMG400022509	75474530..75477100	DNA-damage-repair/toleration protein DRT102		17
chr01	68465011	TSC	G	A	R/Q	172	33	122	64	3.58535e-05	0.00138	PGSC0003DMG400022509	75474530..75477100	DNA-damage-repair/toleration protein DRT102		17
chr01	68465011	TY	G	A	R/Q	91	69	182	46	1.7203e-06	0.0002	PGSC0003DMG400022509	75474530..75477100	DNA-damage-repair/toleration protein DRT102		17
chr01	68465043	TY	C	G	L/V	60	35	129	28	0.000947047	0.01914	PGSC0003DMG400022509	75474530..75477100	DNA-damage-repair/toleration protein DRT102		17
chr01	68465087	TY	C	T		28	55	82	64	0.00148977	0.02619	PGSC0003DMG400022509	75474530..75477100	DNA-damage-repair/toleration protein DRT102		17
chr01	68465132	TSY	C	G		23	11	44	2	0.00134554	0.04322	PGSC0003DMG400022509	75474530..75477100	DNA-damage-repair/toleration protein DRT102		17
chr01	68468422	TSC	C	T		201	16	155	36	0.000576869	0.01065	PGSC0003DMG400022473	75477200..75485600	Zeta-carotene desaturase		17
chr01	68468518	TY	T	A		8	53	32	47	0.00034325	0.00947	PGSC0003DMG400022473	75477200..75485600	Zeta-carotene desaturase		17
chr01	68470336	TSC	G	T		137	78	93	95	0.0047115	0.04747	PGSC0003DMG400022473	75477200..75485600	Zeta-carotene desaturase		17
chr01	68471046	TSC	A	G		79	159	43	172	0.00203316	0.02631	PGSC0003DMG400022473	75477200..75485600	Zeta-carotene desaturase		17
chr01	68471046	TY	A	G		45	189	103	146	1.36534e-07	3e-05	PGSC0003DMG400022473	75477200..75485600	Zeta-carotene desaturase		17
chr01	68471046	TSY	A	G		59	180	102	142	7.33738e-05	0.00659	PGSC0003DMG400022473	75477200..75485600	Zeta-carotene desaturase		17
chr01	68471069	TSC	A	G		125	15	74	26	0.0028246	0.03315	PGSC0003DMG400022473	75477200..75485600	Zeta-carotene desaturase		17
chr01	68471069	TY	A	G		92	35	124	17	0.00181916	0.03003	PGSC0003DMG400022473	75477200..75485600	Zeta-carotene desaturase		17
chr01	68471183	TSC	C	G		29	2	13	9	0.00441757	0.04534	PGSC0003DMG400022473	75477200..75485600	Zeta-carotene desaturase		17
chr01	68475177	TY	G	A		51	116	108	113	0.000377845	0.01012	PGSC0003DMG400022473	75477200..75485600	Zeta-carotene desaturase		17
chr01	68475260	TSC	A	T	F/I	192	32	188	11	0.00339961	0.03769	PGSC0003DMG400022473	75477200..75485600	Zeta-carotene desaturase		17
chr01	68475297	TY	C	A		80	170	122	128	0.000179607	0.00601	PGSC0003DMG400022473	75477200..75485600	Zeta-carotene desaturase		17
chr01	68475297	TSY	C	A		93	157	131	119	0.00085823	0.03253	PGSC0003DMG400022473	75477200..75485600	Zeta-carotene desaturase		17
chr01	68475315	TSC	A	G		202	29	172	56	0.0011123	0.01703	PGSC0003DMG400022473	75477200..75485600	Zeta-carotene desaturase		17
chr01	68475363	TY	A	G		60	59	97	43	0.00223019	0.0345	PGSC0003DMG400022473	75477200..75485600	Zeta-carotene desaturase		17
chr01	68475373	TY	C	T		27	77	68	61	5.14067e-05	0.00246	PGSC0003DMG400022473	75477200..75485600	Zeta-carotene desaturase		17
chr01	68526705	TY	G	A		55	74	134	70	4.22405e-05	0.00214	PGSC0003DMG400022506	75534600..75539900	Cytidine deaminase		17
chr01	68526705	TSY	G	A		63	68	114	52	0.000363995	0.01884	PGSC0003DMG400022506	75534600..75539900	Cytidine deaminase		17
chr01	68526774	TY	T	C		59	94	125	85	8.50375e-05	0.00352	PGSC0003DMG400022506	75534600..75539900	Cytidine deaminase		17
chr01	68526774	TSY	T	C		69	84	109	62	0.00081631	0.03152	PGSC0003DMG400022506	75534600..75539900	Cytidine deaminase		17
chr01	68526821	TY	G	A		174	64	212	38	0.00176413	0.02941	PGSC0003DMG400022506	75534600..75539900	Cytidine deaminase		17
chr01	68526821	TSY	G	A		156	59	221	29	1.62053e-05	0.0024	PGSC0003DMG400022506	75534600..75539900	Cytidine deaminase		17
chr01	68526822	TY	T	A		174	66	210	40	0.00212668	0.03337	PGSC0003DMG400022506	75534600..75539900	Cytidine deaminase		17
chr01	68526822	TSY	T	A		157	60	220	30	2.06186e-05	0.00283	PGSC0003DMG400022506	75534600..75539900	Cytidine deaminase		17
chr01	68526823	TY	C	A		180	65	211	39	0.00293531	0.04155	PGSC0003DMG400022506	75534600..75539900	Cytidine deaminase		17
chr01	68526823	TSY	C	A		163	60	220	30	5.62158e-05	0.00556	PGSC0003DMG400022506	75534600..75539900	Cytidine deaminase		17
chr01	68526829	TY	C	G		108	142	147	103	0.000660339	0.01493	PGSC0003DMG400022506	75534600..75539900	Cytidine deaminase		17
chr01	68526837	TSC	A	C		223	27	196	50	0.00417333	0.04355	PGSC0003DMG400022506	75534600..75539900	Cytidine deaminase		17
chr01	68526837	TY	A	C		198	52	236	14	5.44492e-07	9e-05	PGSC0003DMG400022506	75534600..75539900	Cytidine deaminase		17
chr01	68526846	TY	G	C		115	134	149	101	0.00307511	0.04287	PGSC0003DMG400022506	75534600..75539900	Cytidine deaminase		17
chr01	68526846	TSY	G	C		118	131	158	92	0.000441014	0.02133	PGSC0003DMG400022506	75534600..75539900	Cytidine deaminase		17
chr01	68526910	TY	T	C		37	95	76	79	0.000287969	0.00836	PGSC0003DMG400022506	75534600..75539900	Cytidine deaminase		17
chr01	68526910	TSY	T	C		41	86	74	65	0.000790543	0.0309	PGSC0003DMG400022506	75534600..75539900	Cytidine deaminase		17
chr01	68526929	TY	T	A		34	92	68	82	0.00178277	0.02962	PGSC0003DMG400022506	75534600..75539900	Cytidine deaminase		17
chr01	68526929	TSY	T	A		34	84	69	66	0.000336976	0.0179	PGSC0003DMG400022506	75534600..75539900	Cytidine deaminase		17
chr01	68825591	TSC	C	T		117	53	78	84	0.000148342	0.00396	PGSC0003DMG400022490	75833700..75839800	Sodium/hydrogen exchanger		17
chr01	68825591	TY	C	T		64	87	109	56	2.75878e-05	0.00156	PGSC0003DMG400022490	75833700..75839800	Sodium/hydrogen exchanger		17
chr01	68825633	TSC	A	T		163	76	121	118	0.000128451	0.00356	PGSC0003DMG400022490	75833700..75839800	Sodium/hydrogen exchanger		17
chr01	68825633	TY	A	T		98	143	175	74	4.29829e-11	0	PGSC0003DMG400022490	75833700..75839800	Sodium/hydrogen exchanger		17
chr01	68825633	TSY	A	T		112	89	169	62	0.000177414	0.01178	PGSC0003DMG400022490	75833700..75839800	Sodium/hydrogen exchanger		17
chr01	68825635	TSC	A	G		163	72	121	114	0.000104946	0.00306	PGSC0003DMG400022490	75833700..75839800	Sodium/hydrogen exchanger		17
chr01	68825635	TY	A	G		96	139	175	69	1.13748e-11	0	PGSC0003DMG400022490	75833700..75839800	Sodium/hydrogen exchanger		17
chr01	68825635	TSY	A	G		111	85	169	60	0.000220141	0.01354	PGSC0003DMG400022490	75833700..75839800	Sodium/hydrogen exchanger		17
chr01	68825748	TSC	A	G		160	89	93	110	9.41634e-05	0.00283	PGSC0003DMG400022490	75833700..75839800	Sodium/hydrogen exchanger		17
chr01	68825748	TY	A	G		83	115	134	94	0.000658093	0.01489	PGSC0003DMG400022490	75833700..75839800	Sodium/hydrogen exchanger		17
chr01	68825780	TY	G	C		83	5	67	33	2.57802e-06	0.00027	PGSC0003DMG400022490	75833700..75839800	Sodium/hydrogen exchanger		17
chr01	68825780	TSY	G	C		64	10	54	30	0.00168812	0.04974	PGSC0003DMG400022490	75833700..75839800	Sodium/hydrogen exchanger		17
chr01	68825822	TSC	A	G		69	29	33	46	0.000217862	0.00524	PGSC0003DMG400022490	75833700..75839800	Sodium/hydrogen exchanger		17
chr01	68872476	TSC	T	A	F/Y	167	80	125	103	0.00467043	0.04717	PGSC0003DMG400022488	75878300..75886600	Protein FRIGIDA		17
chr01	68872476	TY	T	A	F/Y	107	126	172	78	3.81293e-07	7e-05	PGSC0003DMG400022488	75878300..75886600	Protein FRIGIDA		17
chr01	68872476	TSY	T	A	F/Y	126	103	175	74	0.000637399	0.02695	PGSC0003DMG400022488	75878300..75886600	Protein FRIGIDA		17
chr01	68872487	TSC	G	A	V/I	212	35	182	60	0.00410838	0.04308	PGSC0003DMG400022488	75878300..75886600	Protein FRIGIDA		17
chr01	68872487	TY	G	A	V/I	188	61	219	27	9.26077e-05	0.00374	PGSC0003DMG400022488	75878300..75886600	Protein FRIGIDA		17
chr01	68872487	TSY	G	A	V/I	181	54	227	20	6.99553e-06	0.00135	PGSC0003DMG400022488	75878300..75886600	Protein FRIGIDA		17
chr01	68872567	TY	C	A		77	57	140	41	0.000211138	0.00673	PGSC0003DMG400022488	75878300..75886600	Protein FRIGIDA		17
chr01	68872601	TY	A	G		100	73	172	52	8.04721e-05	0.00338	PGSC0003DMG400022488	75878300..75886600	Protein FRIGIDA		17
chr01	68872601	TSY	A	G		95	53	152	38	0.00131666	0.04264	PGSC0003DMG400022488	75878300..75886600	Protein FRIGIDA		17
chr01	68872657	TSC	G	T	R/S	91	5	60	17	0.00113353	0.01727	PGSC0003DMG400022488	75878300..75886600	Protein FRIGIDA		17
chr01	68898202	TSC	G	A	R/Q	52	23	69	6	0.000729523	0.01259	PGSC0003DMG400038982	75907600..75908280	Heat shock protein DnaJ		17
chr01	68898218	TSC	T	A	N/K	67	27	35	38	0.00248292	0.03031	PGSC0003DMG400038982	75907600..75908280	Heat shock protein DnaJ		17
chr01	68898218	TY	T	A	N/K	12	32	75	27	3.21221e-07	6e-05	PGSC0003DMG400038982	75907600..75908280	Heat shock protein DnaJ		17
chr01	68898278	TY	C	T		34	75	96	91	0.00100256	0.01993	PGSC0003DMG400038982	75907600..75908280	Heat shock protein DnaJ		17
chr01	68910825	TSC	T	A		230	17	107	24	0.00144435	0.02056	PGSC0003DMG400022482	75919470..75921060	Heat shock protein DnaJ		17
chr01	68910834	TY	G	A		101	71	194	54	2.17612e-05	0.00131	PGSC0003DMG400022482	75919470..75921060	Heat shock protein DnaJ		17
chr01	68910874	TSC	T	A	L/I	184	48	141	13	0.00103426	0.01617	PGSC0003DMG400022482	75919470..75921060	Heat shock protein DnaJ		17
chr01	68910874	TSY	T	A	L/I	154	19	182	60	0.00036532	0.01889	PGSC0003DMG400022482	75919470..75921060	Heat shock protein DnaJ		17
chr01	68910890	TY	T	G		72	70	172	63	1.31634e-05	0.00091	PGSC0003DMG400022482	75919470..75921060	Heat shock protein DnaJ		17
chr01	68910898	TY	T	C		123	14	223	5	0.00124039	0.02306	PGSC0003DMG400022482	75919470..75921060	Heat shock protein DnaJ		17
chr01	68910960	TSC	A	G		186	64	142	97	0.000515476	0.00982	PGSC0003DMG400022482	75919470..75921060	Heat shock protein DnaJ		17
chr01	68910960	TY	A	G		122	97	173	77	0.00296598	0.04183	PGSC0003DMG400022482	75919470..75921060	Heat shock protein DnaJ		17
chr01	68910972	TSC	C	G		225	23	229	6	0.0018973	0.02503	PGSC0003DMG400022482	75919470..75921060	Heat shock protein DnaJ		17
chr01	68916662	TSC	T	G	F/V	23	16	3	24	9.4764e-05	0.00284	PGSC0003DMG400022481	75925400..75927120	Heat shock protein DnaJ		17
chr01	68916662	TY	T	G	F/V	1	21	25	21	4.32668e-05	0.00217	PGSC0003DMG400022481	75925400..75927120	Heat shock protein DnaJ		17
chr01	68916739	TSC	G	T		37	31	91	13	1.96032e-06	0.00015	PGSC0003DMG400022481	75925400..75927120	Heat shock protein DnaJ		17
chr01	68930129	TSC	G	A		115	11	65	32	6.21041e-06	0.00037	PGSC0003DMG400022478	75937370..75941520	Heat shock protein DnaJ		17
chr01	68930310	TSC	G	A	D/N	189	17	156	48	2.22878e-05	0.00097	PGSC0003DMG400022478	75937370..75941520	Heat shock protein DnaJ		17
chr01	68930310	TY	G	A	D/N	157	44	206	18	5.62947e-05	0.00263	PGSC0003DMG400022478	75937370..75941520	Heat shock protein DnaJ		17
chr01	68930335	TSC	C	A	P/H	230	16	180	56	8.63369e-08	1e-05	PGSC0003DMG400022478	75937370..75941520	Heat shock protein DnaJ		17
chr01	68930335	TY	C	A	P/H	171	51	236	13	1.37204e-08	1e-05	PGSC0003DMG400022478	75937370..75941520	Heat shock protein DnaJ		17
chr01	69081806	TY	T	G	K/Q	162	82	211	39	3.57416e-06	0.00035	PGSC0003DMG400028594	76088300..76097800	Breast carcinoma amplified sequence		17
chr01	69081806	TSY	T	G	K/Q	134	83	208	39	5.10555e-08	4e-05	PGSC0003DMG400028594	76088300..76097800	Breast carcinoma amplified sequence		17
chr01	69085358	TSC	A	T		178	30	123	3	0.000217546	0.00523	PGSC0003DMG400028594	76088300..76097800	Breast carcinoma amplified sequence		17
chr01	69085533	TY	T	C		1	64	19	100	0.00214956	0.03363	PGSC0003DMG400028594	76088300..76097800	Breast carcinoma amplified sequence		17
chr01	69210160	TY	C	T		15	140	62	148	3.99059e-06	0.00038	PGSC0003DMG400028567	76218570..76223400	Sugar transporter		17
chr01	69210160	TSY	C	T		13	132	62	120	3.58971e-08	3e-05	PGSC0003DMG400028567	76218570..76223400	Sugar transporter		17
chr01	69210186	TY	G	A		16	126	61	135	1.25649e-05	0.00088	PGSC0003DMG400028567	76218570..76223400	Sugar transporter		17
chr01	69210186	TSY	G	A		15	115	59	110	3.1242e-06	0.00077	PGSC0003DMG400028567	76218570..76223400	Sugar transporter		17
chr01	69210236	TY	C	T		25	104	81	129	0.000185904	0.00616	PGSC0003DMG400028567	76218570..76223400	Sugar transporter		17
chr01	69210236	TSY	C	T		14	94	75	121	1.81208e-06	0.00054	PGSC0003DMG400028567	76218570..76223400	Sugar transporter		17
chr01	69210267	TY	T	C		22	100	84	138	0.000141072	0.00505	PGSC0003DMG400028567	76218570..76223400	Sugar transporter		17
chr01	69210267	TSY	T	C		13	91	78	131	2.91658e-06	0.00074	PGSC0003DMG400028567	76218570..76223400	Sugar transporter		17
chr01	69210269	TY	A	G		22	82	84	129	0.00144666	0.02569	PGSC0003DMG400028567	76218570..76223400	Sugar transporter		17
chr01	69210269	TSY	A	G		13	79	78	118	1.05527e-05	0.0018	PGSC0003DMG400028567	76218570..76223400	Sugar transporter		17
chr01	69277635	TSC	A	T		195	21	125	54	3.09059e-07	4e-05	PGSC0003DMG400028599	76284600..76290200	Glutathione synthetase, chloroplastic		17
chr01	69277833	TSC	A	T		43	20	18	30	0.00194363	0.02548	PGSC0003DMG400028599	76284600..76290200	Glutathione synthetase, chloroplastic		17
chr01	69310183	TSC	C	T	A/V	89	24	66	73	3.34119e-07	4e-05	PGSC0003DMG400028576	76319620..76322950	Verticillium wilt disease resistance protein		17
chr01	69310183	TY	C	T	A/V	34	59	133	21	7.4832e-16	0	PGSC0003DMG400028576	76319620..76322950	Verticillium wilt disease resistance protein		17
chr01	69310183	TSY	C	T	A/V	23	20	124	16	2.52258e-06	0.00067	PGSC0003DMG400028576	76319620..76322950	Verticillium wilt disease resistance protein		17
chr01	69310305	TSC	G	A	G/R	68	29	49	64	0.000154656	0.00408	PGSC0003DMG400028576	76319620..76322950	Verticillium wilt disease resistance protein		17
chr01	69310319	TSC	T	A		79	34	53	69	4.63175e-05	0.00168	PGSC0003DMG400028576	76319620..76322950	Verticillium wilt disease resistance protein		17
chr01	69310380	TSC	A	C	I/L	35	17	20	34	0.00207384	0.02667	PGSC0003DMG400028576	76319620..76322950	Verticillium wilt disease resistance protein		17
chr01	69342169	TY	A	G		12	85	52	95	5.16423e-05	0.00247	PGSC0003DMG400028603	76347100..76354400	Aspartic proteinase nepenthesin-1	Extracellular proteinase found in the pitcher fluid of carnivorous plants	17
chr01	69342169	TSY	A	G		8	68	48	70	3.88499e-06	0.00091	PGSC0003DMG400028603	76347100..76354400	Aspartic proteinase nepenthesin-1		17
chr01	69342361	TSC	C	T	V/I	159	91	117	133	0.000219624	0.00527	PGSC0003DMG400028603	76347100..76354400	Aspartic proteinase nepenthesin-1		17
chr01	69453239	TSC	A	G		132	36	155	17	0.00424409	0.04406	PGSC0003DMG400028583	76462370..76466150	Heat shock protein		17
chr01	69453266	TSC	G	T		113	22	74	72	3.65206e-09	0	PGSC0003DMG400028583	76462370..76466150	Heat shock protein		17
chr01	69453276	TSY	G	A		61	33	47	82	4.18311e-05	0.00454	PGSC0003DMG400028583	76462370..76466150	Heat shock protein		17
chr01	69453292	TSY	C	G		54	30	45	77	0.00012656	0.00945	PGSC0003DMG400028583	76462370..76466150	Heat shock protein		17
chr01	69453385	TSC	A	T		47	9	22	20	0.00147722	0.02091	PGSC0003DMG400028583	76462370..76466150	Heat shock protein		17
chr01	69492656	TSC	C	T	S/N	229	18	168	74	2.62452e-11	0	PGSC0003DMG400028609	76502330..76502830	Gene of unknown function		17
chr01	69492818	TSC	C	T		157	20	104	37	0.000672719	0.01188	PGSC0003DMG400028609	76502330..76502830	Gene of unknown function		17
chr01	69502362	TSC	T	G		198	45	126	64	0.000352475	0.00744	PGSC0003DMG400028611	76509980..76514550	Peroxisomal membrane protein pmp34		17
chr01	69502402	TSC	T	A		145	32	101	51	0.00145157	0.02064	PGSC0003DMG400028611	76509980..76514550	Peroxisomal membrane protein pmp34		17
chr01	69502419	TSC	G	T		118	17	75	51	2.69127e-07	3e-05	PGSC0003DMG400028611	76509980..76514550	Peroxisomal membrane protein pmp34		17
chr01	69602440	TSC	T	C		25	30	28	7	0.00187583	0.02482	PGSC0003DMG400018995	76609600..76615900	Conserved gene of unknown function		17
chr01	69602456	TSC	G	A		38	42	36	12	0.002983	0.03442	PGSC0003DMG400018995	76609600..76615900	Conserved gene of unknown function		17
chr01	69602485	TSC	A	T		120	14	56	29	3.93045e-05	0.00148	PGSC0003DMG400018995	76609600..76615900	Conserved gene of unknown function		17
chr01	69602491	TSC	T	G		125	16	59	34	7.11195e-06	0.00041	PGSC0003DMG400018995	76609600..76615900	Conserved gene of unknown function		17
chr01	69602562	TSC	T	C		226	18	171	75	3.42747e-11	0	PGSC0003DMG400018995	76609600..76615900	Conserved gene of unknown function		17
chr01	69602580	TSC	A	T		211	23	149	71	3.41929e-09	0	PGSC0003DMG400018995	76609600..76615900	Conserved gene of unknown function		17
chr01	69602619	TY	C	A		89	80	106	48	0.0031612	0.04367	PGSC0003DMG400018995	76609600..76615900	Conserved gene of unknown function		17
chr01	69602619	TSY	C	A		79	77	97	40	0.000516279	0.02354	PGSC0003DMG400018995	76609600..76615900	Conserved gene of unknown function		17
chr01	69602658	TY	A	C		59	144	95	107	0.000224718	0.00702	PGSC0003DMG400018995	76609600..76615900	Conserved gene of unknown function		17
chr01	69602658	TSY	A	C		53	134	89	80	3.07134e-06	0.00077	PGSC0003DMG400018995	76609600..76615900	Conserved gene of unknown function		17
chr01	69602659	TY	A	G		59	146	95	109	0.000234728	0.00723	PGSC0003DMG400018995	76609600..76615900	Conserved gene of unknown function		17
chr01	69602659	TSY	A	G		54	134	88	82	9.138e-06	0.00164	PGSC0003DMG400018995	76609600..76615900	Conserved gene of unknown function		17
chr01	69602690	TSC	T	C		221	26	172	53	0.000188355	0.0047	PGSC0003DMG400018995	76609600..76615900	Conserved gene of unknown function		17
chr01	69602692	TSC	G	T		141	96	153	57	0.00371455	0.04015	PGSC0003DMG400018995	76609600..76615900	Conserved gene of unknown function		17
chr01	69602692	TY	G	T		116	118	160	77	8.47696e-05	0.00351	PGSC0003DMG400018995	76609600..76615900	Conserved gene of unknown function		17
chr01	69602692	TSY	G	T		102	119	136	60	1.84416e-06	0.00054	PGSC0003DMG400018995	76609600..76615900	Conserved gene of unknown function		17
chr01	69602693	TSY	T	C		32	183	70	124	7.45964e-07	0.00029	PGSC0003DMG400018995	76609600..76615900	Conserved gene of unknown function		17
chr01	69602750	TY	A	C		23	72	61	59	7.73713e-05	0.00328	PGSC0003DMG400018995	76609600..76615900	Conserved gene of unknown function		17
chr01	69602750	TSY	A	C		22	67	46	46	0.000679928	0.02809	PGSC0003DMG400018995	76609600..76615900	Conserved gene of unknown function		17
chr01	69794077	TSC	G	A		15	37	38	17	4.21987e-05	0.00157	PGSC0003DMG401024737	76881600..76893300	Beta-mannosidase		17
chr01	69794082	TSC	C	A		55	6	36	25	0.000128313	0.00355	PGSC0003DMG401024737	76881600..76893300	Beta-mannosidase		17
chr01	69794131	TSC	G	T		50	89	75	60	0.00156637	0.02182	PGSC0003DMG401024737	76881600..76893300	Beta-mannosidase		17
chr01	69794162	TSC	A	G		141	16	92	46	1.44535e-06	0.00012	PGSC0003DMG401024737	76881600..76893300	Beta-mannosidase		17
chr01	69827950	TSC	G	A		72	8	48	21	0.00190951	0.02514	PGSC0003DMG400024685	76916910..76919490	Long-chain acyl-CoA synthetase		17
chr01	69827968	TSC	T	C		77	22	44	43	0.000117304	0.00332	PGSC0003DMG400024685	76916910..76919490	Long-chain acyl-CoA synthetase		17
chr01	69827987	TSC	T	G		106	12	70	33	8.81092e-05	0.00269	PGSC0003DMG400024685	76916910..76919490	Long-chain acyl-CoA synthetase		17
chr01	69828080	TSC	A	C		159	62	91	95	2.38367e-06	0.00018	PGSC0003DMG400024685	76916910..76919490	Long-chain acyl-CoA synthetase		17
chr01	69828083	TSC	C	G		180	39	126	58	0.00156217	0.02178	PGSC0003DMG400024685	76916910..76919490	Long-chain acyl-CoA synthetase		17
chr01	69828098	TSC	C	T		177	28	115	55	1.81272e-05	0.00083	PGSC0003DMG400024685	76916910..76919490	Long-chain acyl-CoA synthetase		17
chr01	69828133	TSC	C	T		147	23	106	39	0.00422328	0.04391	PGSC0003DMG400024685	76916910..76919490	Long-chain acyl-CoA synthetase		17
chr01	69828141	TSC	C	T		167	14	108	40	4.30588e-06	0.00028	PGSC0003DMG400024685	76916910..76919490	Long-chain acyl-CoA synthetase		17
chr01	69828171	TSC	G	T		169	28	112	47	0.000615362	0.01115	PGSC0003DMG400024685	76916910..76919490	Long-chain acyl-CoA synthetase		17
chr01	69828172	TSC	A	G		162	29	113	45	0.00361699	0.03941	PGSC0003DMG400024685	76916910..76919490	Long-chain acyl-CoA synthetase		17
chr01	69847211	TSC	A	C		25	25	4	66	2.91859e-08	1e-05	PGSC0003DMG400024687	76935650..76938510	F-box family protein		17
chr01	69847211	TY	A	C		2	59	20	62	0.000356685	0.00972	PGSC0003DMG400024687	76935650..76938510	F-box family protein		17
chr01	69847215	TSC	C	T		26	25	5	66	4.04149e-08	1e-05	PGSC0003DMG400024687	76935650..76938510	F-box family protein		17
chr01	69847215	TY	C	T		2	62	21	64	0.000186427	0.00617	PGSC0003DMG400024687	76935650..76938510	F-box family protein		17
chr01	69847283	TSC	C	T		14	16	1	37	1.28057e-05	0.00064	PGSC0003DMG400024687	76935650..76938510	F-box family protein		17
chr01	69847363	TSC	A	G		7	5	1	20	0.00123356	0.01835	PGSC0003DMG400024687	76935650..76938510	F-box family protein		17
chr01	69853260	TY	T	A		103	2	161	26	0.000627495	0.01441	PGSC0003DMG400024740	76938800..76947100	Vacuole membrane protein		17
chr01	69853310	TSC	G	A		225	24	182	67	7.63168e-07	8e-05	PGSC0003DMG400024740	76938800..76947100	Vacuole membrane protein		17
chr01	69853310	TY	G	A		176	59	221	29	0.000143325	0.00511	PGSC0003DMG400024740	76938800..76947100	Vacuole membrane protein		17
chr01	69853365	TY	C	T	S/N	174	5	190	30	0.000120303	0.00451	PGSC0003DMG400024740	76938800..76947100	Vacuole membrane protein		17
chr01	69853365	TSY	C	T	S/N	140	6	180	36	0.00017796	0.01181	PGSC0003DMG400024740	76938800..76947100	Vacuole membrane protein		17
chr01	69853388	TSC	G	A		195	15	152	44	1.64115e-05	0.00077	PGSC0003DMG400024740	76938800..76947100	Vacuole membrane protein		17
chr01	69853393	TSC	G	C	L/V	193	15	154	45	1.10638e-05	0.00057	PGSC0003DMG400024740	76938800..76947100	Vacuole membrane protein		17
chr01	69853394	TSC	A	T		193	15	155	45	1.16606e-05	0.0006	PGSC0003DMG400024740	76938800..76947100	Vacuole membrane protein		17
chr01	69853408	TSY	G	A	P/S	202	8	189	36	2.17329e-05	0.00294	PGSC0003DMG400024740	76938800..76947100	Vacuole membrane protein		17
chr01	69853517	TSC	G	T		132	14	84	27	0.00181838	0.02429	PGSC0003DMG400024740	76938800..76947100	Vacuole membrane protein		17
chr01	69853517	TSY	G	T		99	10	108	36	0.00155904	0.04741	PGSC0003DMG400024740	76938800..76947100	Vacuole membrane protein		17
chr01	69930838	TSY	T	A	L/H	22	26	53	12	0.000107516	0.0085	PGSC0003DMG400024693	77019220..77023090	Lipoxygenase		17
chr01	69930963	TSC	T	G		195	38	165	67	0.00128474	0.01888	PGSC0003DMG400024693	77019220..77023090	Lipoxygenase		17
chr01	69930963	TY	T	G		160	74	197	43	0.000628571	0.01443	PGSC0003DMG400024693	77019220..77023090	Lipoxygenase		17
chr01	69930987	TY	C	T		133	68	181	33	1.27592e-05	0.00089	PGSC0003DMG400024693	77019220..77023090	Lipoxygenase		17
chr01	69930987	TSY	C	T		105	76	179	32	4.34252e-09	1e-05	PGSC0003DMG400024693	77019220..77023090	Lipoxygenase		17
chr01	69931052	TSC	C	G		195	40	162	65	0.00377133	0.04059	PGSC0003DMG400024693	77019220..77023090	Lipoxygenase		17
chr01	69931056	TY	G	A		214	18	193	56	7.11301e-06	0.00057	PGSC0003DMG400024693	77019220..77023090	Lipoxygenase		17
chr01	69931056	TSY	G	A		186	22	182	52	0.0013138	0.04258	PGSC0003DMG400024693	77019220..77023090	Lipoxygenase		17
chr01	69931130	TSY	C	T		81	51	111	27	0.000736755	0.0296	PGSC0003DMG400024693	77019220..77023090	Lipoxygenase		17
chr01	69974788	TSY	G	A		84	57	126	28	3.32071e-05	0.00389	PGSC0003DMG402024742	77060200..77076200	AMP-activated protein kinase, gamma regulatory subunit	signaling, regulation	17
chr01	69974837	TSC	G	A		117	19	55	29	0.000660105	0.01172	PGSC0003DMG402024742	77060200..77076200	AMP-activated protein kinase, gamma regulatory subunit		17
chr01	69982562	TY	C	A		106	80	178	48	2.31278e-06	0.00025	PGSC0003DMG402024742	77060200..77076200	AMP-activated protein kinase, gamma regulatory subunit		17
chr01	69982562	TSY	C	A		71	82	154	41	3.31262e-10	0	PGSC0003DMG402024742	77060200..77076200	AMP-activated protein kinase, gamma regulatory subunit		17
chr01	70206337	TSC	G	T	P/T	170	66	107	104	4.20416e-06	0.00028	PGSC0003DMG400024750	77294500..77301300	Pentatricopeptide repeat-containing protein		17
chr01	70206339	TSC	A	T	M/K	220	23	139	75	2.53608e-11	0	PGSC0003DMG400024750	77294500..77301300	Pentatricopeptide repeat-containing protein		17
chr01	70206339	TY	A	T	M/K	146	72	210	38	1.03162e-05	0.00076	PGSC0003DMG400024750	77294500..77301300	Pentatricopeptide repeat-containing protein		17
chr01	70218189	TY	A	G		29	103	92	132	0.000212674	0.00676	PGSC0003DMG400042893	77307520..77310720	Conserved gene of unknown function		17
chr01	70218189	TSY	A	G		22	104	90	105	9.83261e-08	7e-05	PGSC0003DMG400042893	77307520..77310720	Conserved gene of unknown function		17
chr01	70260882	TY	T	A		29	45	70	33	0.000210693	0.00672	PGSC0003DMG400024755	77350560..77353330	Xyloglucan endotransglucosylase/hydrolase 1		17
chr01	70260886	TY	T	A		28	44	65	38	0.00204473	0.03249	PGSC0003DMG400024755	77350560..77353330	Xyloglucan endotransglucosylase/hydrolase 1		17
chr01	70260891	TY	A	T		12	58	60	41	2.3942e-08	1e-05	PGSC0003DMG400024755	77350560..77353330	Xyloglucan endotransglucosylase/hydrolase 1		17
chr01	70261085	TSC	T	C		69	13	30	26	0.000197904	0.00487	PGSC0003DMG400024755	77350560..77353330	Xyloglucan endotransglucosylase/hydrolase 1		17
chr01	70261085	TY	T	C		27	27	93	30	0.00148484	0.02614	PGSC0003DMG400024755	77350560..77353330	Xyloglucan endotransglucosylase/hydrolase 1		17
chr01	70261091	TSC	C	T		64	11	26	23	0.000156015	0.0041	PGSC0003DMG400024755	77350560..77353330	Xyloglucan endotransglucosylase/hydrolase 1		17
chr01	70261091	TY	C	T		24	24	83	27	0.00281324	0.04038	PGSC0003DMG400024755	77350560..77353330	Xyloglucan endotransglucosylase/hydrolase 1		17
chr01	70261133	TSC	T	C		34	8	11	20	0.000102219	0.003	PGSC0003DMG400024755	77350560..77353330	Xyloglucan endotransglucosylase/hydrolase 1		17
chr01	70261133	TY	T	C		11	17	42	15	0.00382012	0.04958	PGSC0003DMG400024755	77350560..77353330	Xyloglucan endotransglucosylase/hydrolase 1		17
chr01	70263368	TSC	A	T		147	30	105	55	0.000262323	0.00601	PGSC0003DMG400024755	77350560..77353330	Xyloglucan endotransglucosylase/hydrolase 1		17
chr01	70379798	TY	T	G		6	26	21	18	0.00318486	0.04389	PGSC0003DMG400024715	77468600..77474700	26S protease regulatory subunit 6A homolog		17
chr01	70379854	TY	C	T		4	73	38	42	5.69285e-10	0	PGSC0003DMG400024715	77468600..77474700	26S protease regulatory subunit 6A homolog		17
chr01	70464591	TSC	C	T		141	22	93	46	5.5374e-05	0.00191	PGSC0003DMG400024718	77554160..77555150	Hypoxia-responsive family protein		17/18
chr01	70464676	TY	C	G		38	48	63	21	4.78622e-05	0.00234	PGSC0003DMG400024718	77554160..77555150	Hypoxia-responsive family protein		17/18
chr01	70464676	TSY	C	G		23	47	56	16	9.92132e-08	7e-05	PGSC0003DMG400024718	77554160..77555150	Hypoxia-responsive family protein		17/18
chr01	70464681	TY	T	C		52	35	71	16	0.00253063	0.03756	PGSC0003DMG400024718	77554160..77555150	Hypoxia-responsive family protein		17/18
chr01	70464681	TSY	T	C		31	37	62	13	3.93755e-06	0.00092	PGSC0003DMG400024718	77554160..77555150	Hypoxia-responsive family protein		17/18
chr01	70464731	TY	T	A		11	44	29	32	0.00309623	0.04308	PGSC0003DMG400024718	77554160..77555150	Hypoxia-responsive family protein		17/18
chr01	70647487	TSC	T	A		99	3	63	16	0.000325955	0.00704	PGSC0003DMG400024772	77736440..77739940	Protein phosphatase 2c		17/18
chr01	70647494	TSC	C	T		116	56	106	19	0.000689556	0.01209	PGSC0003DMG400024772	77736440..77739940	Protein phosphatase 2c		17/18
chr01	70647494	TY	C	T		116	29	150	97	8.14124e-05	0.00341	PGSC0003DMG400024772	77736440..77739940	Protein phosphatase 2c		17/18
chr01	70647509	TSC	G	A		201	10	149	36	5.9013e-06	0.00036	PGSC0003DMG400024772	77736440..77739940	Protein phosphatase 2c		17/18
chr01	70776344	TSC	T	G		89	7	56	17	0.00385178	0.04116	PGSC0003DMG400024778	77863900..77870100	Fiber protein Fb2		17/18
chr01	70776353	TSC	C	T		96	7	60	18	0.00213626	0.02724	PGSC0003DMG400024778	77863900..77870100	Fiber protein Fb2		17/18
chr01	70776431	TSC	G	A		195	11	124	38	3.86113e-07	5e-05	PGSC0003DMG400024778	77863900..77870100	Fiber protein Fb2		17/18
chr01	70776467	TSC	G	A		162	8	99	34	1.81197e-07	3e-05	PGSC0003DMG400024778	77863900..77870100	Fiber protein Fb2		17/18
chr01	70776499	TSC	G	A		182	55	203	24	0.000314359	0.00685	PGSC0003DMG400024778	77863900..77870100	Fiber protein Fb2		17/18
chr01	70921323	TY	C	T		150	9	171	31	0.00381433	0.04952	PGSC0003DMG400002807	78007300..78014000	Conserved gene of unknown function		18
chr01	70921391	TSC	G	C		203	14	142	48	1.47081e-07	2e-05	PGSC0003DMG400002807	78007300..78014000	Conserved gene of unknown function		18
chr01	70921439	TSC	G	A		79	33	85	11	0.00197134	0.02573	PGSC0003DMG400002807	78007300..78014000	Conserved gene of unknown function		18
chr01	70956369	TY	G	A		3	42	17	22	8.26343e-05	0.00345	PGSC0003DMG400002806	78046200..78052600	Zinc finger protein		18
chr01	70956405	TY	A	T		10	82	37	54	3.61484e-06	0.00035	PGSC0003DMG400002806	78046200..78052600	Zinc finger protein		18
chr01	70956428	TSC	A	G		113	9	71	27	8.1454e-05	0.00254	PGSC0003DMG400002806	78046200..78052600	Zinc finger protein		18
chr01	70956430	TY	A	T		15	95	48	84	6.1384e-05	0.00279	PGSC0003DMG400002806	78046200..78052600	Zinc finger protein		18
chr01	70956476	TSC	A	G		140	11	94	31	7.69893e-05	0.00244	PGSC0003DMG400002806	78046200..78052600	Zinc finger protein		18
chr01	70956530	TY	G	A		206	33	176	61	0.00122196	0.02283	PGSC0003DMG400002806	78046200..78052600	Zinc finger protein		18
chr01	70956541	TSC	C	T		218	17	176	53	1.91725e-06	0.00015	PGSC0003DMG400002806	78046200..78052600	Zinc finger protein		18
chr01	70956541	TY	C	T		194	38	220	10	2.45285e-05	0.00144	PGSC0003DMG400002806	78046200..78052600	Zinc finger protein		18
chr01	70956652	TY	C	T		145	18	154	61	3.68147e-05	0.00193	PGSC0003DMG400002806	78046200..78052600	Zinc finger protein		18
chr01	70956652	TSY	C	T		128	19	144	54	0.00131737	0.04265	PGSC0003DMG400002806	78046200..78052600	Zinc finger protein		18
chr01	70956695	TY	T	C		63	18	77	65	0.000516961	0.0126	PGSC0003DMG400002806	78046200..78052600	Zinc finger protein		18
chr01	70962197	TY	A	G		27	178	87	151	1.76116e-08	1e-05	PGSC0003DMG400002806	78046200..78052600	Zinc finger protein		18
chr01	70962227	TY	C	G		34	163	80	138	9.5149e-06	0.00071	PGSC0003DMG400002806	78046200..78052600	Zinc finger protein		18
chr01	70962248	TY	C	T		142	26	180	11	0.00291551	0.04136	PGSC0003DMG400002806	78046200..78052600	Zinc finger protein		18
chr01	70962255	TY	G	A		25	136	68	118	1.0405e-05	0.00076	PGSC0003DMG400002806	78046200..78052600	Zinc finger protein		18
chr01	70962275	TY	T	C		25	124	68	104	7.62481e-06	0.0006	PGSC0003DMG400002806	78046200..78052600	Zinc finger protein		18
chr01	70962289	TSC	T	C		46	28	24	45	0.00142939	0.02042	PGSC0003DMG400002806	78046200..78052600	Zinc finger protein		18
chr01	70962289	TY	T	C		14	49	62	26	4.26751e-09	0	PGSC0003DMG400002806	78046200..78052600	Zinc finger protein		18
chr01	70962309	TSC	T	A		52	31	26	47	0.00125663	0.0186	PGSC0003DMG400002806	78046200..78052600	Zinc finger protein		18
chr01	70962309	TY	T	A		14	50	67	28	1.28816e-09	0	PGSC0003DMG400002806	78046200..78052600	Zinc finger protein		18
chr01	70995780	TY	T	A		101	64	98	120	0.00192883	0.03123	PGSC0003DMG400002775	78085260..78089950	Pyrophosphate-energized vacuolar membrane proton pump		18
chr01	70995859	TSC	T	C	I/V	146	53	76	75	1.16126e-05	0.00059	PGSC0003DMG400002775	78085260..78089950	Pyrophosphate-energized vacuolar membrane proton pump		18
chr01	70995905	TSC	G	A		183	67	92	88	4.07625e-06	0.00027	PGSC0003DMG400002775	78085260..78089950	Pyrophosphate-energized vacuolar membrane proton pump		18
chr01	70995917	TSC	A	T		182	68	97	91	5.92796e-06	0.00036	PGSC0003DMG400002775	78085260..78089950	Pyrophosphate-energized vacuolar membrane proton pump		18
chr01	71001600	TSC	G	C		166	11	115	31	9.30771e-05	0.0028	PGSC0003DMG400002774	78090930..78094180	Ribosomal pseudouridine synthase		18
chr01	71001602	TY	G	A		132	29	225	13	9.41938e-05	0.00379	PGSC0003DMG400002774	78090930..78094180	Ribosomal pseudouridine synthase		18
chr01	71001656	TSC	T	C		155	13	119	41	1.18652e-05	0.0006	PGSC0003DMG400002774	78090930..78094180	Ribosomal pseudouridine synthase		18
chr01	71001765	TY	T	G		46	24	38	62	0.000564233	0.01339	PGSC0003DMG400002774	78090930..78094180	Ribosomal pseudouridine synthase		18
chr01	71059321	TSC	G	A		100	49	91	14	0.000369623	0.00771	PGSC0003DMG400002801	78144200..78150100	Conserved gene of unknown function		18
chr01	71059393	TSC	T	C		174	75	221	28	2.46713e-07	3e-05	PGSC0003DMG400002801	78144200..78150000	Conserved gene of unknown function		18
chr01	71059396	TSC	T	C		174	76	222	27	7.07581e-08	1e-05	PGSC0003DMG400002801	78144200..78150000	Conserved gene of unknown function		18
chr01	71059496	TSC	A	G	T/A	234	15	172	49	3.33842e-07	4e-05	PGSC0003DMG400002801	78144200..78150000	Conserved gene of unknown function		18
chr01	71059669	TSC	A	T		87	114	112	76	0.00163145	0.02247	PGSC0003DMG400002801	78144200..78150000	Conserved gene of unknown function		18
chr01	71059669	TY	A	T		121	56	90	112	4.62232e-06	0.00042	PGSC0003DMG400002801	78144200..78150000	Conserved gene of unknown function		18
chr01	71059696	TY	G	T	K/N	109	11	101	30	0.00356819	0.04735	PGSC0003DMG400002801	78144200..78150000	Conserved gene of unknown function		18
chr01	71083556	TSC	T	A	N/Y	216	31	239	11	0.00113738	0.01731	PGSC0003DMG400002769	78172450..78176980	Knox		18
chr01	71083556	TSY	T	A	N/Y	199	22	195	54	0.000642381	0.0271	PGSC0003DMG400002769	78172450..78176980	Knox		18
chr01	71083599	TSC	C	A	E/D	175	47	188	13	1.15698e-05	0.00059	PGSC0003DMG400002769	78172450..78176980	Knox		18
chr01	71083599	TY	C	A	E/D	165	19	166	55	0.000159915	0.00552	PGSC0003DMG400002769	78172450..78176980	Knox		18
chr01	71083659	TSC	G	T		90	80	90	21	1.17163e-06	0.0001	PGSC0003DMG400002769	78172450..78176980	Knox		18
chr01	71083659	TY	G	T		109	52	100	109	0.000141123	0.00505	PGSC0003DMG400002769	78172450..78176980	Knox		18
chr01	71083660	TSC	A	C		103	67	95	17	1.00554e-05	0.00053	PGSC0003DMG400002769	78172450..78176980	Knox		18
chr01	71083660	TY	A	C		117	44	116	92	0.00106517	0.02078	PGSC0003DMG400002769	78172450..78176980	Knox		18
chr01	71083661	TSC	T	G		107	66	96	17	1.89289e-05	0.00086	PGSC0003DMG400002769	78172450..78176980	Knox		18
chr01	71083661	TY	T	G		118	44	119	89	0.00220118	0.0342	PGSC0003DMG400002769	78172450..78176980	Knox		18
chr01	71094655	TSC	A	T		218	20	132	41	2.07595e-05	0.00092	PGSC0003DMG400002768	78181800..78190400	ATP-dependent Clp protease proteolytic subunit		18
chr01	71654585	TSC	T	C		71	17	91	2	0.000145075	0.00389	PGSC0003DMG400018291	78744400..78752500	Ecotropic viral integration site
chr01	71654606	TSC	A	G		188	16	139	47	3.5731e-06	0.00024	PGSC0003DMG400018291	78744400..78752500	Ecotropic viral integration site
chr01	71654623	TSC	C	T		176	37	209	4	2.58171e-08	1e-05	PGSC0003DMG400018291	78744400..78752500	Ecotropic viral integration site
chr01	71654636	TSC	T	G		157	31	194	5	1.87302e-06	0.00015	PGSC0003DMG400018291	78744400..78752500	Ecotropic viral integration site
chr01	71654718	TSC	A	T		136	15	70	36	2.77668e-06	0.0002	PGSC0003DMG400018291	78744400..78752500	Ecotropic viral integration site
chr01	71665866	TY	A	G		115	51	104	146	3.00391e-08	1e-05	PGSC0003DMG400018248	78753200..78758500	Receptor kinase 3
chr01	71665866	TSY	A	G		102	60	97	128	0.000133699	0.00979	PGSC0003DMG400018248	78753200..78758500	Receptor kinase 3
chr01	72008812	TSC	C	T	R/Q	157	92	169	43	9.19798e-05	0.00278	PGSC0003DMG400018235	79098010..79100740	Nitrate transporter		19
chr01	72008880	TY	G	A		64	151	25	186	5.02538e-06	0.00045	PGSC0003DMG400018235	79098010..79100740	Nitrate transporter		19
chr01	72008880	TSY	G	A		70	139	40	173	0.000594465	0.02577	PGSC0003DMG400018235	79098010..79100740	Nitrate transporter		19
chr01	72009065	TY	C	G	A/P	20	49	14	110	0.00291106	0.04132	PGSC0003DMG400018235	79098010..79100740	Nitrate transporter		19
chr01	72024322	TY	T	C		146	69	221	29	9.92166e-08	2e-05	PGSC0003DMG400018278	79113900..79119100	Endonuclease		19
chr01	72024322	TSY	T	C		127	45	211	33	0.00139423	0.04417	PGSC0003DMG400018278	79113900..79119100	Endonuclease		19
chr01	72096762	TY	G	A		161	76	226	15	1.83996e-13	0	PGSC0003DMG400018231	79186400..79193300	Conserved gene of unknown function		19
chr01	72096762	TSY	G	A		157	74	224	18	8.98751e-12	0	PGSC0003DMG400018231	79186400..79193300	Conserved gene of unknown function		19
chr01	72096850	TSY	G	A		172	29	228	10	0.000181371	0.01196	PGSC0003DMG400018231	79186400..79193300	Conserved gene of unknown function		19
chr01	72096954	TY	T	C	N/S	72	33	135	17	9.26712e-05	0.00374	PGSC0003DMG400018231	79186400..79193300	Conserved gene of unknown function		19
chr01	72115584	TY	G	C		1	10	13	5	0.00169915	0.02866	PGSC0003DMG400018273	79201600..79209400	NADPH:adrenodoxin oxidoreductase, mitochondrial		19
chr01	72115762	TSC	G	A		107	56	137	33	0.00283865	0.03326	PGSC0003DMG400018273	79201600..79209400	NADPH:adrenodoxin oxidoreductase, mitochondrial		19
chr01	72115762	TY	G	A		125	30	154	77	0.00260121	0.03827	PGSC0003DMG400018273	79201600..79209400	NADPH:adrenodoxin oxidoreductase, mitochondrial		19
chr01	72115766	TY	G	T		54	101	148	78	4.02726e-09	0	PGSC0003DMG400018273	79201600..79209400	NADPH:adrenodoxin oxidoreductase, mitochondrial		19
chr01	72115766	TSY	G	T		58	86	120	56	6.18465e-07	0.00025	PGSC0003DMG400018273	79201600..79209400	NADPH:adrenodoxin oxidoreductase, mitochondrial		19
chr01	72115770	TY	T	C		54	102	147	77	3.62835e-09	0	PGSC0003DMG400018273	79201600..79209400	NADPH:adrenodoxin oxidoreductase, mitochondrial		19
chr01	72115770	TSY	T	C		57	86	119	56	5.63866e-07	0.00023	PGSC0003DMG400018273	79201600..79209400	NADPH:adrenodoxin oxidoreductase, mitochondrial		19
chr01	72115775	TY	C	T		51	98	146	71	4.62292e-10	0	PGSC0003DMG400018273	79201600..79209400	NADPH:adrenodoxin oxidoreductase, mitochondrial		19
chr01	72115775	TSY	C	T		54	82	120	51	9.0128e-08	6e-05	PGSC0003DMG400018273	79201600..79209400	NADPH:adrenodoxin oxidoreductase, mitochondrial		19
chr01	72115810	TY	A	G		14	107	48	137	0.002188	0.03406	PGSC0003DMG400018273	79201600..79209400	NADPH:adrenodoxin oxidoreductase, mitochondrial		19
chr01	72115814	TSY	A	G		87	19	89	56	0.000451327	0.02164	PGSC0003DMG400018273	79201600..79209400	NADPH:adrenodoxin oxidoreductase, mitochondrial		19
chr01	72115818	TY	G	A		40	77	119	58	2.99844e-08	1e-05	PGSC0003DMG400018273	79201600..79209400	NADPH:adrenodoxin oxidoreductase, mitochondrial		19
chr01	72115818	TSY	G	A		44	61	99	40	6.83629e-06	0.00132	PGSC0003DMG400018273	79201600..79209400	NADPH:adrenodoxin oxidoreductase, mitochondrial		19
chr01	72123543	TY	A	G	F/S	19	211	52	176	1.64446e-05	0.00107	PGSC0003DMG400018228	79210400..79215600	Conserved gene of unknown function		19
chr01	72123545	TSC	C	T		156	69	195	29	6.74023e-06	0.00039	PGSC0003DMG400018228	79210400..79215600	Conserved gene of unknown function		19
chr01	72123584	TY	A	G		91	47	166	16	2.84283e-08	1e-05	PGSC0003DMG400018228	79210400..79215600	Conserved gene of unknown function		19
chr01	72123584	TSY	A	G		87	34	131	13	7.91993e-05	0.00692	PGSC0003DMG400018228	79210400..79215600	Conserved gene of unknown function		19
chr01	72123641	TY	T	C		103	48	214	18	2.02209e-09	0	PGSC0003DMG400018228	79210400..79215600	Conserved gene of unknown function		19
chr01	72123641	TSY	T	C		93	31	162	15	0.000139564	0.01006	PGSC0003DMG400018228	79210400..79215600	Conserved gene of unknown function		19
chr01	72130320	TY	C	T		37	19	84	3	1.13465e-06	0.00015	PGSC0003DMG400018227	79217800..79231900	Conserved gene of unknown function		19
chr01	72130320	TSY	C	T		35	12	69	3	0.00112501	0.03857	PGSC0003DMG400018227	79217800..79231900	Conserved gene of unknown function		19
chr01	72130415	TY	A	G		134	44	118	82	0.00100861	0.02001	PGSC0003DMG400018227	79217800..79231900	Conserved gene of unknown function		19
chr01	72130510	TY	G	A		145	55	220	15	2.72289e-09	0	PGSC0003DMG400018227	79217800..79231900	Conserved gene of unknown function		19
chr01	72130510	TSY	G	A		148	53	217	17	7.96834e-08	6e-05	PGSC0003DMG400018227	79217800..79231900	Conserved gene of unknown function		19
chr01	72130513	TY	A	G		149	56	234	14	1.87288e-10	0	PGSC0003DMG400018227	79217800..79231900	Conserved gene of unknown function		19
chr01	72130513	TSY	A	G		157	52	228	16	5.924e-08	5e-05	PGSC0003DMG400018227	79217800..79231900	Conserved gene of unknown function		19
chr01	72315573	TY	A	G		44	13	12	42	5.96253e-09	0	PGSC0003DMG401018219	79398800..79405900	Cinnamoyl-CoA reductase		19
chr01	72364365	TY	A	T	T/S	107	78	97	149	0.000204863	0.00659	PGSC0003DMG400018260	79453000..79460100	Histidyl-tRNA synthetase		19
chr01	72364464	TSC	G	A	V/M	133	23	155	5	0.000265671	0.00606	PGSC0003DMG400018260	79453000..79460100	Histidyl-tRNA synthetase		19
chr01	72364513	TY	T	C	V/A	86	145	35	185	2.84667e-07	5e-05	PGSC0003DMG400018260	79453000..79460100	Histidyl-tRNA synthetase		19
chr01	72364513	TSY	T	C	V/A	70	138	32	170	3.4738e-05	0.004	PGSC0003DMG400018260	79453000..79460100	Histidyl-tRNA synthetase		19
chr01	72364816	TY	G	A		141	10	179	56	6.53071e-06	0.00054	PGSC0003DMG400018260	79453000..79460100	Histidyl-tRNA synthetase		19
chr01	72364921	TY	C	T		155	10	155	42	3.44594e-05	0.00184	PGSC0003DMG400018260	79453000..79460100	Histidyl-tRNA synthetase		19
chr01	72366302	TY	T	G		30	60	13	102	0.000222976	0.00699	PGSC0003DMG400018260	79453000..79460100	Histidyl-tRNA synthetase		19
chr01	72366443	TY	G	A		162	14	162	52	1.91362e-05	0.0012	PGSC0003DMG400018260	79453000..79460100	Histidyl-tRNA synthetase		19
chr01	72366443	TSY	G	A		143	19	127	50	0.000150342	0.01055	PGSC0003DMG400018260	79453000..79460100	Histidyl-tRNA synthetase		19
chr01	72366460	TY	G	A		113	8	102	30	0.000348809	0.00958	PGSC0003DMG400018260	79453000..79460100	Histidyl-tRNA synthetase		19
chr01	72366531	TY	A	G		131	7	139	38	3.24107e-05	0.00176	PGSC0003DMG400018260	79453000..79460100	Histidyl-tRNA synthetase		19
chr01	72414559	TY	G	A	D/N	59	4	94	30	0.00239043	0.03613	PGSC0003DMG400018255	79503630..79504880	Conserved gene of unknown function		19
chr01	72414586	TY	C	T	P/S	40	30	112	17	7.17771e-06	0.00058	PGSC0003DMG400018255	79503630..79504880	Conserved gene of unknown function		19
chr01	72414593	TY	G	A	R/H	73	7	91	41	0.000153715	0.00536	PGSC0003DMG400018255	79503630..79504880	Conserved gene of unknown function		19
chr01	72414627	TY	C	T		128	28	150	100	3.32813e-06	0.00033	PGSC0003DMG400018255	79503630..79504880	Conserved gene of unknown function		19
chr01	72414628	TY	G	A	G/S	84	69	199	35	1.08704e-10	0	PGSC0003DMG400018255	79503630..79504880	Conserved gene of unknown function		19
chr01	72414628	TSY	G	A	G/S	69	43	190	40	4.48053e-05	0.00475	PGSC0003DMG400018255	79503630..79504880	Conserved gene of unknown function		19
chr01	72414701	TY	G	A	S/N	56	38	108	18	1.77857e-05	0.00114	PGSC0003DMG400018255	79503630..79504880	Conserved gene of unknown function		19
chr01	72414701	TSY	G	A	S/N	58	31	97	15	0.000381175	0.01941	PGSC0003DMG400018255	79503630..79504880	Conserved gene of unknown function		19
chr01	72414722	TY	T	G		56	50	113	25	1.49253e-06	0.00018	PGSC0003DMG400018255	79503630..79504880	Conserved gene of unknown function		19
chr01	72414722	TSY	T	G		58	44	98	21	5.31634e-05	0.00536	PGSC0003DMG400018255	79503630..79504880	Conserved gene of unknown function		19
chr01	72414795	TY	A	G		32	24	80	7	1.67932e-06	0.0002	PGSC0003DMG400018255	79503630..79504880	Conserved gene of unknown function		19
chr01	72414795	TSY	A	G		34	20	65	7	0.000337332	0.01791	PGSC0003DMG400018255	79503630..79504880	Conserved gene of unknown function		19
chr01	72516695	TSY	C	T		152	19	138	52	0.000106268	0.00845	PGSC0003DMG400013099	79600700..79614900	Conserved gene of unknown function		19
chr01	72516725	TY	G	T		15	65	61	60	6.5127e-06	0.00054	PGSC0003DMG400013099	79600700..79614900	Conserved gene of unknown function		19
chr01	72578411	TY	G	A		50	22	86	8	0.00040598	0.01063	PGSC0003DMG400020722	79663400..79670300	TMV resistance protein N		19
chr01	72578615	TSC	A	T		65	98	124	60	3.37494e-07	4e-05	PGSC0003DMG400020722	79663400..79670300	TMV resistance protein N		19
chr01	72578615	TSY	A	T		65	97	100	72	0.00105433	0.03704	PGSC0003DMG400020722	79663400..79670300	TMV resistance protein N		19
chr01	72578618	TSC	G	A		64	99	127	60	1.10471e-07	2e-05	PGSC0003DMG400020722	79663400..79670300	TMV resistance protein N		19
chr01	72578618	TSY	G	A		66	98	101	71	0.000742961	0.02973	PGSC0003DMG400020722	79663400..79670300	TMV resistance protein N		19
chr01	72578669	TSC	T	A		195	23	163	75	5.0136e-08	1e-05	PGSC0003DMG400020722	79663400..79670300	TMV resistance protein N		19
chr01	72578669	TY	T	A		173	77	209	41	0.000210113	0.00671	PGSC0003DMG400020722	79663400..79670300	TMV resistance protein N		19
chr01	72578760	TSC	C	G	P/A	60	36	74	16	0.00321889	0.03631	PGSC0003DMG400020722	79663400..79670300	TMV resistance protein N		19
chr01	72578760	TSY	C	G	P/A	45	36	71	16	0.00040003	0.02002	PGSC0003DMG400020722	79663400..79670300	TMV resistance protein N		19
chr01	72766235	TSC	A	G		181	23	164	52	0.000838237	0.01393	PGSC0003DMG400020705	79851100..79859900	U2 snrnp auxiliary factor, small subunit		19
chr01	72766235	TY	A	G		134	51	213	9	1.17309e-11	0	PGSC0003DMG400020705	79851100..79859900	U2 snrnp auxiliary factor, small subunit		19
chr01	72766235	TSY	A	G		112	32	178	12	2.93412e-05	0.00358	PGSC0003DMG400020705	79851100..79859900	U2 snrnp auxiliary factor, small subunit		19
chr01	72766293	TSC	A	C		137	38	94	56	0.00218394	0.02767	PGSC0003DMG400020705	79851100..79859900	U2 snrnp auxiliary factor, small subunit		19
chr01	72766297	TSC	T	G		41	132	5	142	9.88651e-08	2e-05	PGSC0003DMG400020705	79851100..79859900	U2 snrnp auxiliary factor, small subunit		19
chr01	72766297	TY	T	G		11	126	35	144	0.00380581	0.04944	PGSC0003DMG400020705	79851100..79859900	U2 snrnp auxiliary factor, small subunit		19
chr01	72766414	TY	G	A		61	26	124	8	4.7293e-06	0.00043	PGSC0003DMG400020705	79851100..79859900	U2 snrnp auxiliary factor, small subunit		19
chr01	72766414	TSY	G	A		48	23	98	6	5.42967e-06	0.00114	PGSC0003DMG400020705	79851100..79859900	U2 snrnp auxiliary factor, small subunit		19
chr01	72783487	TY	T	C		35	61	107	53	2.5954e-06	0.00027	PGSC0003DMG402024871	79870200..79877600	Conserved gene of unknown function		19
chr01	72783586	TSC	C	A		55	182	21	157	0.00310388	0.03539	PGSC0003DMG402024871	79870200..79877600	Conserved gene of unknown function		19
chr01	72783586	TY	C	A		14	195	43	192	0.000316567	0.00893	PGSC0003DMG402024871	79870200..79877600	Conserved gene of unknown function		19
chr01	72785625	TSC	G	A		33	134	11	173	0.000151227	0.00401	PGSC0003DMG402024871	79870200..79877600	Conserved gene of unknown function		19
chr01	72785637	TY	C	A		115	40	115	84	0.00162414	0.02779	PGSC0003DMG402024871	79870200..79877600	Conserved gene of unknown function		19
chr01	72785637	TSY	C	A		101	27	101	63	0.00145834	0.0455	PGSC0003DMG402024871	79870200..79877600	Conserved gene of unknown function		19
chr01	72785644	TY	A	T		111	42	179	15	9.51658e-07	0.00013	PGSC0003DMG402024871	79870200..79877600	Conserved gene of unknown function		19
chr01	72785644	TSY	A	T		94	30	144	15	0.000959935	0.03485	PGSC0003DMG402024871	79870200..79877600	Conserved gene of unknown function		19
chr01	72806981	TSY	C	G	G/A	18	10	17	51	0.000433428	0.02108	PGSC0003DMG400024904	79892200..79899200	C1C-Nt1 protein		19
chr01	72807130	TSY	A	G		53	41	40	84	0.000517938	0.02358	PGSC0003DMG400024904	79892200..79899200	C1C-Nt1 protein		19
chr01	72807200	TSC	G	T		54	142	16	156	8.28159e-06	0.00046	PGSC0003DMG400024904	79892200..79899200	C1C-Nt1 protein		19
chr01	72807200	TY	G	T		16	151	40	143	0.00203197	0.03234	PGSC0003DMG400024904	79892200..79899200	C1C-Nt1 protein		19
chr01	72837871	TSC	T	C	I/V	16	45	1	36	0.00221736	0.02797	PGSC0003DMG400024906	79924000..79932300	Conserved gene of unknown function		19
chr01	72837942	TSC	C	T		87	16	40	32	3.25152e-05	0.00129	PGSC0003DMG400024906	79924000..79932300	Conserved gene of unknown function		19
chr01	72837942	TY	C	T		31	24	99	8	1.24331e-07	3e-05	PGSC0003DMG400024906	79924000..79932300	Conserved gene of unknown function		19
chr01	72837969	TY	A	T		42	3	64	26	0.00330539	0.04499	PGSC0003DMG400024906	79924000..79932300	Conserved gene of unknown function		19
chr01	72837973	TY	A	C		22	18	77	8	2.24027e-05	0.00134	PGSC0003DMG400024906	79924000..79932300	Conserved gene of unknown function		19
chr01	72838011	TSC	T	C	Q/R	144	43	76	52	0.00110801	0.01698	PGSC0003DMG400024906	79924000..79932300	Conserved gene of unknown function		19
chr01	72838011	TY	T	C	Q/R	69	42	161	21	1.83751e-07	4e-05	PGSC0003DMG400024906	79924000..79932300	Conserved gene of unknown function		19
chr01	72838024	TSC	T	C	T/A	132	42	69	48	0.00287578	0.03355	PGSC0003DMG400024906	79924000..79932300	Conserved gene of unknown function		19
chr01	72838024	TY	T	C	T/A	62	40	144	19	2.95209e-07	5e-05	PGSC0003DMG400024906	79924000..79932300	Conserved gene of unknown function		19
chr01	72838097	TSC	G	A		77	32	31	36	0.00149348	0.02107	PGSC0003DMG400024906	79924000..79932300	Conserved gene of unknown function		19
chr01	72838109	TSC	G	A		30	86	7	68	0.00481478	0.04818	PGSC0003DMG400024906	79924000..79932300	Conserved gene of unknown function		19
chr01	72838117	TSC	A	G		31	89	7	68	0.00502964	0.04966	PGSC0003DMG400024906	79924000..79932300	Conserved gene of unknown function		19
chr01	72939560	TY	G	T		3	105	24	160	0.00292789	0.04148	PGSC0003DMG400024880	80022600..80030100	Conserved gene of unknown function		19
chr01	72939652	TSC	G	A		210	33	171	73	1.5614e-05	0.00074	PGSC0003DMG400024880	80022600..80030100	Conserved gene of unknown function		19
chr01	72939652	TY	G	A		158	75	224	21	6.55922e-11	0	PGSC0003DMG400024880	80022600..80030100	Conserved gene of unknown function		19
chr01	72939652	TSY	G	A		177	52	218	23	0.000132714	0.00974	PGSC0003DMG400024880	80022600..80030100	Conserved gene of unknown function		19
chr01	72939827	TSC	A	G		32	51	4	37	0.00071558	0.01242	PGSC0003DMG400024880	80022600..80030100	Conserved gene of unknown function		19
chr01	73036501	TSC	A	G		38	209	11	223	0.000121482	0.00341	PGSC0003DMG400024884	80123600..80132000	Nonsense-mediated decay UPF3		19
chr01	73036501	TSY	A	G		49	197	22	227	0.000488864	0.02276	PGSC0003DMG400024884	80123600..80132000	Nonsense-mediated decay UPF3		19
chr01	73036594	TY	C	G		95	9	114	59	7.1163e-07	0.00011	PGSC0003DMG400024884	80123600..80132000	Nonsense-mediated decay UPF3		19
chr01	73060790	TSC	G	A		55	3	40	14	0.00302958	0.03481	PGSC0003DMG400024885	80142100..80151200	Salt-inducible protein kinase	signaling, regulation	19
chr01	73060790	TY	G	A		33	22	66	6	2.60441e-05	0.0015	PGSC0003DMG400024885	80142100..80151200	Salt-inducible protein kinase		19
chr01	73060839	TSC	C	G		104	13	70	29	0.000959418	0.01534	PGSC0003DMG400024885	80142100..80151200	Salt-inducible protein kinase		19
chr01	73060839	TY	C	G		58	38	118	12	8.51188e-08	2e-05	PGSC0003DMG400024885	80142100..80151200	Salt-inducible protein kinase		19
chr01	73061020	TSC	G	T		128	56	84	82	0.000308854	0.00677	PGSC0003DMG400024885	80142100..80151200	Salt-inducible protein kinase		19
chr01	73106844	TSC	A	G		211	38	237	10	2.62882e-05	0.0011	PGSC0003DMG400024914	80196320..80197320	Conserved gene of unknown function		19
chr01	73106888	TY	C	T	V/M	181	34	146	83	1.02448e-06	0.00014	PGSC0003DMG400024914	80196320..80197320	Conserved gene of unknown function		19
chr01	73106888	TSY	C	T	V/M	147	39	138	89	7.17707e-05	0.00651	PGSC0003DMG400024914	80196320..80197320	Conserved gene of unknown function		19
chr01	73107012	TSC	T	C		74	12	33	21	0.00101399	0.01596	PGSC0003DMG400024914	80196320..80197320	Conserved gene of unknown function		19
chr01	73107012	TY	T	C		37	24	98	18	0.000700246	0.01555	PGSC0003DMG400024914	80196320..80197320	Conserved gene of unknown function		19
chr01	73139617	TSC	G	A	D/N	33	107	10	120	0.000399135	0.00815	PGSC0003DMG400024890	80227910..80232460	Receptor protein kinase CLAVATA1		19
chr01	73139649	TY	A	G		72	90	145	53	2.98585e-08	1e-05	PGSC0003DMG400024890	80227910..80232460	Receptor protein kinase CLAVATA1		19
chr01	73139649	TSY	A	G		80	71	137	45	2.90708e-05	0.00356	PGSC0003DMG400024890	80227910..80232460	Receptor protein kinase CLAVATA1		19
chr01	73139682	TY	T	A		55	63	130	46	2.63569e-06	0.00028	PGSC0003DMG400024890	80227910..80232460	Receptor protein kinase CLAVATA1		19
chr01	73139682	TSY	T	A		60	49	116	40	0.00145532	0.04544	PGSC0003DMG400024890	80227910..80232460	Receptor protein kinase CLAVATA1		19
chr01	73139916	TSC	C	T		102	96	49	106	0.000219493	0.00526	PGSC0003DMG400024890	80227910..80232460	Receptor protein kinase CLAVATA1		19
chr01	73139916	TY	C	T		50	109	117	85	5.49138e-07	9e-05	PGSC0003DMG400024890	80227910..80232460	Receptor protein kinase CLAVATA1		19
chr01	73139922	TSC	T	C		93	119	31	140	6.30375e-08	1e-05	PGSC0003DMG400024890	80227910..80232460	Receptor protein kinase CLAVATA1		19
chr01	73139922	TY	T	C		20	154	109	104	2.97284e-17	0	PGSC0003DMG400024890	80227910..80232460	Receptor protein kinase CLAVATA1		19
chr01	73156462	TSC	T	C		39	28	44	5	0.000163807	0.00424	PGSC0003DMG400024892	80244400..80250300	Pseudouridine synthase		19
chr01	73156462	TY	T	C		61	5	47	26	7.35326e-05	0.00317	PGSC0003DMG400024892	80244400..80250300	Pseudouridine synthase		19
chr01	73156467	TSC	G	C		40	29	42	6	0.000863459	0.01423	PGSC0003DMG400024892	80244400..80250300	Pseudouridine synthase		19
chr01	73156559	TSC	G	T		173	74	150	20	8.84769e-06	0.00048	PGSC0003DMG400024892	80244400..80250300	Pseudouridine synthase		19
chr01	73156559	TY	G	T		144	13	169	72	9.85271e-08	2e-05	PGSC0003DMG400024892	80244400..80250300	Pseudouridine synthase		19
chr01	73156560	TSC	C	A		175	73	148	21	4.23995e-05	0.00157	PGSC0003DMG400024892	80244400..80250300	Pseudouridine synthase		19
chr01	73156560	TY	C	A		140	14	170	69	1.95323e-06	0.00022	PGSC0003DMG400024892	80244400..80250300	Pseudouridine synthase		19
chr01	73156585	TSC	G	A		161	67	133	23	0.000891387	0.01456	PGSC0003DMG400024892	80244400..80250300	Pseudouridine synthase		19
chr01	73156585	TY	G	A		127	15	147	64	8.01668e-06	0.00063	PGSC0003DMG400024892	80244400..80250300	Pseudouridine synthase		19
chr01	73156625	TSC	A	G		126	54	107	18	0.00159117	0.02207	PGSC0003DMG400024892	80244400..80250300	Pseudouridine synthase		19
chr01	73156625	TY	A	G		108	13	121	53	5.75687e-05	0.00267	PGSC0003DMG400024892	80244400..80250300	Pseudouridine synthase		19
chr01	73206107	TSC	T	A		117	24	140	7	0.000980878	0.01558	PGSC0003DMG400024918	80290100..80296300	Conserved gene of unknown function		19
chr01	73206107	TY	T	A		127	11	130	33	0.00299138	0.04208	PGSC0003DMG400024918	80290100..80296300	Conserved gene of unknown function		19
chr01	73206117	TY	A	T		88	46	145	9	4.59198e-10	0	PGSC0003DMG400024918	80290100..80296300	Conserved gene of unknown function		19
chr01	73206117	TSY	A	T		83	29	125	7	7.01777e-06	0.00135	PGSC0003DMG400024918	80290100..80296300	Conserved gene of unknown function		19
chr01	73294941	TSC	A	G		171	16	113	27	0.0050646	0.0499	PGSC0003DMG400024923	80290100..80296300	Conserved gene of unknown function		19
chr01	73341017	TSC	A	G		184	12	108	53	4.45529e-11	0	PGSC0003DMG400024925	80428400..80436300	Ribosome biogenesis protein bop1		19
chr01	73341035	TSC	A	G		59	133	23	132	0.000568592	0.01053	PGSC0003DMG400024925	80428400..80436300	Ribosome biogenesis protein bop1		19
chr01	73341035	TY	A	G		8	117	37	165	0.00262362	0.0385	PGSC0003DMG400024925	80428400..80436300	Ribosome biogenesis protein bop1		19
chr01	73341596	TY	A	G		92	98	138	78	0.00188188	0.03073	PGSC0003DMG400024925	80428400..80436300	Ribosome biogenesis protein bop1		19
chr01	73341606	TY	A	G		51	121	95	114	0.00208757	0.03296	PGSC0003DMG400024925	80428400..80436300	Ribosome biogenesis protein bop1		19
chr01	73341660	TY	C	T	G/R	87	93	165	79	9.02782e-05	0.00368	PGSC0003DMG400024925	80428400..80436300	Ribosome biogenesis protein bop1		19
chr01	73362951	TY	G	C		0	134	23	188	8.73724e-06	0.00067	PGSC0003DMG401024899	80447300..80453800	Non-imprinted in Prader-Willi/Angelman syndrome region protein		19
chr01	73362951	TSY	G	C		1	89	23	154	0.000553213	0.02461	PGSC0003DMG401024899	80447300..80453800	Non-imprinted in Prader-Willi/Angelman syndrome region protein		19
chr01	73444273	TSC	A	G		43	145	90	97	3.39499e-07	4e-05	PGSC0003DMG401024930	80530500..80536600	Transcription factor RF2a		19
chr01	73444273	TY	A	G		103	95	52	159	1.5723e-08	1e-05	PGSC0003DMG401024930	80530500..80536600	Transcription factor RF2a		19
chr01	73469895	TY	C	A		59	27	98	10	0.000171328	0.00581	PGSC0003DMG400004531	80559600..80566400	Endomembrane protein emp70		19
chr01	73470016	TSC	C	T		198	4	169	23	8.10303e-05	0.00253	PGSC0003DMG400004531	80559600..80566400	Endomembrane protein emp70		19
chr01	73470037	TSC	A	G		221	5	186	26	4.66122e-05	0.00169	PGSC0003DMG400004531	80559600..80566400	Endomembrane protein emp70		19
chr01	73470050	TSC	G	A		217	21	169	60	6.85543e-07	7e-05	PGSC0003DMG400004531	80559600..80566400	Endomembrane protein emp70		19
chr01	73470050	TY	G	A		162	61	233	17	1.94314e-09	0	PGSC0003DMG400004531	80559600..80566400	Endomembrane protein emp70		19
chr01	73470050	TSY	G	A		151	38	227	23	0.00129087	0.0421	PGSC0003DMG400004531	80559600..80566400	Endomembrane protein emp70		19
chr01	73471426	TSC	G	A		98	7	70	22	0.000990263	0.01569	PGSC0003DMG400004531	80559600..80566400	Endomembrane protein emp70		19
chr01	73539213	TSC	C	G		119	26	88	53	0.000212018	0.00513	PGSC0003DMG400023801	80628610..80633080	Armadillo repeat-containing protein		19
chr01	73539213	TY	C	G		70	52	134	20	3.88922e-08	1e-05	PGSC0003DMG400023801	80628610..80633080	Armadillo repeat-containing protein		19
chr01	73660666	TSC	T	C		47	12	16	16	0.00463736	0.04694	PGSC0003DMG400023796	80748160..80752560	Membrane protein		19
chr01	73660849	TSC	A	T		136	38	68	51	0.0001649	0.00427	PGSC0003DMG400023796	80748160..80752560	Membrane protein		19
chr01	73660858	TSC	G	A		134	45	68	52	0.00155473	0.0217	PGSC0003DMG400023796	80748160..80752560	Membrane protein		19
chr01	73660882	TSC	T	C		20	120	0	97	1.77647e-05	0.00082	PGSC0003DMG400023796	80748160..80752560	Membrane protein		19
chr01	73662212	TSC	A	G		221	8	157	21	0.00158691	0.02203	PGSC0003DMG400023796	80748160..80752560	Membrane protein		19
chr01	73662248	TY	A	G		73	68	169	68	0.000161249	0.00555	PGSC0003DMG400023796	80748160..80752560	Membrane protein		19
chr01	73662249	TY	A	G		105	32	217	19	6.67158e-05	0.00297	PGSC0003DMG400023796	80748160..80752560	Membrane protein		19
chr01	73662250	TY	A	G		108	33	219	14	1.60858e-06	0.00019	PGSC0003DMG400023796	80748160..80752560	Membrane protein		19
chr01	73928437	TSC	G	C		158	62	146	25	0.00141401	0.02025	PGSC0003DMG400023750	81017500..81025300	Sterol glucosyltransferase		19/20
chr01	73928487	TY	T	A		83	43	169	18	1.66847e-07	4e-05	PGSC0003DMG400023750	81017500..81025300	Sterol glucosyltransferase		19/20
chr01	73928487	TSY	T	A		75	31	141	16	0.000124867	0.00937	PGSC0003DMG400023750	81017500..81025300	Sterol glucosyltransferase		19/20
chr01	74204215	TSC	T	C		138	15	97	32	0.00116807	0.01766	PGSC0003DMG400023773	81292900..81300000	Conserved gene of unknown function		19/20
chr01	74204215	TY	T	C		110	36	210	18	1.55424e-05	0.00103	PGSC0003DMG400023773	81292900..81300000	Conserved gene of unknown function		19/20
chr01	74204247	TSC	G	T	G/V	155	18	108	31	0.00478897	0.04801	PGSC0003DMG400023773	81292900..81300000	Conserved gene of unknown function		19/20
chr01	74204247	TY	G	T	G/V	119	49	221	19	2.74025e-08	1e-05	PGSC0003DMG400023773	81292900..81300000	Conserved gene of unknown function		19/20
chr01	74204247	TSY	G	T	G/V	106	34	176	20	0.000805536	0.03127	PGSC0003DMG400023773	81292900..81300000	Conserved gene of unknown function		19/20
chr01	74204263	TSC	T	C		231	19	166	50	3.11431e-06	0.00022	PGSC0003DMG400023773	81292900..81300000	Conserved gene of unknown function		19/20
chr01	74204263	TY	T	C		172	77	231	16	1.02957e-12	0	PGSC0003DMG400023773	81292900..81300000	Conserved gene of unknown function		19/20
chr01	74204263	TSY	T	C		186	55	230	19	2.29237e-06	0.00063	PGSC0003DMG400023773	81292900..81300000	Conserved gene of unknown function		19/20
chr01	74204326	TSC	C	T		196	26	216	9	0.00256635	0.03102	PGSC0003DMG400023773	81292900..81300000	Conserved gene of unknown function		19/20
chr01	74210024	TSC	G	T		43	14	57	3	0.00334279	0.03726	PGSC0003DMG400023773	81292900..81300000	Conserved gene of unknown function		19/20
chr01	74307262	TY	C	T		28	22	57	12	0.00202013	0.03221	PGSC0003DMG400029761	81396130..81400500	Hec1 protein (constituent of the mitotic kinetochore)		19/20
chr01	74307297	TY	G	A		59	8	76	37	0.00223108	0.03451	PGSC0003DMG400029761	81396130..81400500	Hec1 protein (constituent of the mitotic kinetochore)		19/20
chr01	74307297	TSY	G	A		47	5	67	33	0.00144712	0.04526	PGSC0003DMG400029761	81396130..81400500	Hec1 protein (constituent of the mitotic kinetochore)		19/20
chr01	74307378	TY	A	T		87	47	177	25	1.30885e-06	0.00017	PGSC0003DMG400029761	81396130..81400500	Hec1 protein (constituent of the mitotic kinetochore)		19/20
chr01	74307381	TY	T	C		87	45	176	23	1.44316e-06	0.00018	PGSC0003DMG400029761	81396130..81400500	Hec1 protein (constituent of the mitotic kinetochore)		19/20
chr01	74346398	TY	T	G	L/F	101	46	157	14	1.35356e-07	3e-05	PGSC0003DMG401029758	81431400..81436600	Pentatricopeptide repeat-containing protein		19/20
chr01	74522171	TY	G	A		62	3	61	23	0.000187809	0.0062	PGSC0003DMG400029765	81607960..81612500	Serine carboxypeptidase		20
chr01	74522192	TSC	A	C		135	22	131	3	0.000252593	0.00584	PGSC0003DMG400029765	81607960..81612500	Serine carboxypeptidase		20
chr01	74522209	TY	C	A		70	66	153	42	4.27323e-07	7e-05	PGSC0003DMG400029765	81607960..81612500	Serine carboxypeptidase		20
chr01	74522215	TY	G	A		62	72	127	70	0.0014909	0.0262	PGSC0003DMG400029765	81607960..81612500	Serine carboxypeptidase		20
chr01	74522219	TSC	C	T		130	36	87	69	1.76147e-05	0.00081	PGSC0003DMG400029765	81607960..81612500	Serine carboxypeptidase		20
chr01	74522231	TSC	A	T		147	9	110	32	3.39723e-05	0.00133	PGSC0003DMG400029765	81607960..81612500	Serine carboxypeptidase		20
chr01	74522239	TY	C	T		52	63	115	55	0.000223232	0.00699	PGSC0003DMG400029765	81607960..81612500	Serine carboxypeptidase		20
chr01	74522328	TSC	A	G	T/A	229	18	189	52	7.93085e-06	0.00045	PGSC0003DMG400029765	81607960..81612500	Serine carboxypeptidase		20
chr01	74522328	TY	A	G	T/A	171	77	230	19	1.54429e-11	0	PGSC0003DMG400029765	81607960..81612500	Serine carboxypeptidase		20
chr01	74522408	TSC	T	C		201	3	135	15	0.000370329	0.00772	PGSC0003DMG400029765	81607960..81612500	Serine carboxypeptidase		20
chr01	74581305	TY	T	G		214	35	238	12	0.000381924	0.01019	PGSC0003DMG400029740	81670960..81675490	Conserved gene of unknown function		20
chr01	74581558	TY	C	T		65	45	101	26	0.000669519	0.01507	PGSC0003DMG400029740	81670960..81675490	Conserved gene of unknown function		20
chr01	74584106	TY	T	A		203	6	219	31	0.000124142	0.0046	PGSC0003DMG400029740	81670960..81675490	Conserved gene of unknown function		20
chr01	74584199	TSC	A	C		144	15	85	37	1.02428e-05	0.00054	PGSC0003DMG400029740	81670960..81675490	Conserved gene of unknown function		20
chr01	74584199	TY	A	C		77	57	133	34	4.68172e-05	0.0023	PGSC0003DMG400029740	81670960..81675490	Conserved gene of unknown function		20
chr01	74585314	TY	A	C		77	68	115	45	0.000866914	0.01802	PGSC0003DMG400029740	81670960..81675490	Conserved gene of unknown function		20
chr01	74670725	TSC	A	T		213	21	114	45	8.74399e-07	8e-05	PGSC0003DMG400012593	81760520..81765050	PRIP-interacting protein (peroxisome proliferator-activated receptor (PPARγ)-interacting protein)		20
chr01	74670725	TY	A	T		123	70	212	19	9.95364e-13	0	PGSC0003DMG400012593	81760520..81765050	PRIP-interacting protein (peroxisome proliferator-activated receptor (PPARγ)-interacting protein)		20
chr01	74670725	TSY	A	T		120	42	173	18	5.35821e-05	0.00538	PGSC0003DMG400012593	81760520..81765050	PRIP-interacting protein (peroxisome proliferator-activated receptor (PPARγ)-interacting protein)		20
chr01	74697400	TSC	T	A	D/V	149	39	184	9	1.86423e-06	0.00015	PGSC0003DMG400012565	81787330..81789050	Ubiquitin thiolesterase		20
chr01	74697400	TY	T	A	D/V	194	5	223	26	0.00111394	0.02141	PGSC0003DMG400012565	81787330..81789050	Ubiquitin thiolesterase		20
chr01	74697422	TSC	C	A	A/S	177	27	190	5	6.81998e-05	0.00223	PGSC0003DMG400012565	81787330..81789050	Ubiquitin thiolesterase		20
chr01	74697431	TY	T	C	T/A	119	70	192	41	7.80404e-06	0.00061	PGSC0003DMG400012565	81787330..81789050	Ubiquitin thiolesterase		20
chr01	74697481	TSC	T	A	N/I	189	5	151	19	0.00115291	0.01749	PGSC0003DMG400012565	81787330..81789050	Ubiquitin thiolesterase		20
chr01	74697502	TY	T	G	N/T	142	55	212	37	0.000918718	0.01877	PGSC0003DMG400012565	81787330..81789050	Ubiquitin thiolesterase		20
chr01	74697549	TSC	G	C		48	201	20	228	0.000366943	0.00767	PGSC0003DMG400012565	81787330..81789050	Ubiquitin thiolesterase		20
chr01	74697549	TY	G	C		27	221	55	194	0.00101733	0.02012	PGSC0003DMG400012565	81787330..81789050	Ubiquitin thiolesterase		20
chr01	74697582	TY	G	A		183	64	216	31	0.000232865	0.00719	PGSC0003DMG400012565	81787330..81789050	Ubiquitin thiolesterase		20
chr01	74697675	TY	G	A		31	136	76	147	0.000836313	0.01757	PGSC0003DMG400012565	81787330..81789050	Ubiquitin thiolesterase		20
chr01	74705339	TY	T	C		182	20	239	5	0.000341888	0.00945	PGSC0003DMG400012564	81792770..81795520	DH putative beta-hydroxyacyl-ACP dehydratase		20
chr01	74705339	TSY	T	C		150	26	202	6	2.60347e-05	0.00332	PGSC0003DMG400012564	81792770..81795520	DH putative beta-hydroxyacyl-ACP dehydratase		20
chr01	74705344	TSC	G	A		157	13	125	31	0.00180119	0.02413	PGSC0003DMG400012564	81792770..81795520	DH putative beta-hydroxyacyl-ACP dehydratase		20
chr01	74705344	TY	G	A		114	55	190	31	1.46617e-05	0.00099	PGSC0003DMG400012564	81792770..81795520	DH putative beta-hydroxyacyl-ACP dehydratase		20
chr01	74705345	TSC	C	G		148	22	112	42	0.00131225	0.01918	PGSC0003DMG400012564	81792770..81795520	DH putative beta-hydroxyacyl-ACP dehydratase		20
chr01	74705346	TSC	A	T		142	23	108	43	0.00215319	0.02739	PGSC0003DMG400012564	81792770..81795520	DH putative beta-hydroxyacyl-ACP dehydratase		20
chr01	74705423	TSC	A	G		92	3	70	16	0.00105651	0.01642	PGSC0003DMG400012564	81792770..81795520	DH putative beta-hydroxyacyl-ACP dehydratase		20
chr01	74705423	TY	A	G		62	29	103	8	7.15582e-06	0.00058	PGSC0003DMG400012564	81792770..81795520	DH putative beta-hydroxyacyl-ACP dehydratase		20
chr01	74779615	TY	T	C		10	31	41	37	0.00356324	0.04731	PGSC0003DMG401012560	81865000..81871900	Serine/arginine rich splicing factor		20
chr01	74779761	TY	T	C		80	35	180	20	1.00225e-05	0.00074	PGSC0003DMG401012560	81865000..81871900	Serine/arginine rich splicing factor		20
chr01	74779775	TY	C	T		57	53	135	55	0.0011316	0.02165	PGSC0003DMG401012560	81865000..81871900	Serine/arginine rich splicing factor		20
chr01	74781647	TY	A	C		22	204	46	185	0.0024303	0.03652	PGSC0003DMG401012560	81865000..81871900	Serine/arginine rich splicing factor		20
chr01	74781681	TY	T	C		145	105	190	58	1.05421e-05	0.00077	PGSC0003DMG401012560	81865000..81871900	Serine/arginine rich splicing factor		20
chr01	74781681	TSY	T	C		150	97	193	56	6.32641e-05	0.00601	PGSC0003DMG401012560	81865000..81871900	Serine/arginine rich splicing factor		20
chr01	74781747	TSC	A	G		98	38	70	58	0.0047424	0.04768	PGSC0003DMG401012560	81865000..81871900	Serine/arginine rich splicing factor		20
chr01	74781747	TY	A	G		63	51	109	39	0.00248315	0.03707	PGSC0003DMG401012560	81865000..81871900	Serine/arginine rich splicing factor		20
chr01	74787436	TSC	C	T		221	20	180	54	7.9688e-06	0.00045	PGSC0003DMG400012585	81875400..81886300	Potassium transporter		20
chr01	74787436	TY	C	T		178	56	211	31	0.00197207	0.03171	PGSC0003DMG400012585	81875400..81886300	Potassium transporter		20
chr01	74787536	TSC	C	T		118	11	100	27	0.00476359	0.04783	PGSC0003DMG400012585	81875400..81886300	Potassium transporter		20
chr01	74789029	TSY	G	A	R/K	54	6	70	35	0.000705024	0.02876	PGSC0003DMG400012585	81875400..81886300	Potassium transporter		20
chr01	74939032	TSC	T	C		163	45	146	17	0.00481768	0.0482	PGSC0003DMG400012550	82028750..82032220	2-nitropropane dioxygenase		20
chr01	74939053	TY	A	T		21	120	81	146	1.35411e-05	0.00093	PGSC0003DMG400012550	82028750..82032220	2-nitropropane dioxygenase		20
chr01	74939126	TY	C	A	V/L	100	114	149	95	0.00259777	0.03824	PGSC0003DMG400012550	82028750..82032220	2-nitropropane dioxygenase		20
chr01	74939178	TY	A	T		23	92	62	87	0.000195162	0.00637	PGSC0003DMG400012550	82028750..82032220	2-nitropropane dioxygenase		20
chr01	74939181	TY	C	G		75	35	116	17	0.000473164	0.01184	PGSC0003DMG400012550	82028750..82032220	2-nitropropane dioxygenase		20
chr01	74940145	TY	A	T		39	17	64	5	0.000888531	0.01833	PGSC0003DMG400012550	82028750..82032220	2-nitropropane dioxygenase		20
chr01	74940194	TSC	C	G		28	66	9	72	0.00285775	0.03341	PGSC0003DMG400012550	82028750..82032220	2-nitropropane dioxygenase		20
chr01	74940235	TY	A	T		107	52	175	39	0.00151355	0.02649	PGSC0003DMG400012550	82028750..82032220	2-nitropropane dioxygenase		20
chr01	74940265	TY	G	A		150	52	218	17	1.46443e-07	3e-05	PGSC0003DMG400012550	82028750..82032220	2-nitropropane dioxygenase		20
chr01	74940265	TSY	G	A		123	33	180	15	0.000300092	0.01662	PGSC0003DMG400012550	82028750..82032220	2-nitropropane dioxygenase		20
chr01	74940402	TSC	T	A		69	153	27	159	9.84263e-05	0.00292	PGSC0003DMG400012550	82028750..82032220	2-nitropropane dioxygenase		20
chr01	74940402	TY	T	A		20	174	51	186	0.00173116	0.02903	PGSC0003DMG400012550	82028750..82032220	2-nitropropane dioxygenase		20
chr01	74940468	TSC	T	A		34	79	9	70	0.00257572	0.0311	PGSC0003DMG400012550	82028750..82032220	2-nitropropane dioxygenase		20
chr01	74972449	TSC	G	A		49	90	13	76	0.000716789	0.01244	PGSC0003DMG400012549	82060350..82064340	2-dehydro-3-deoxyphosphoheptonate aldolase/ 3-deoxy-d-arabino-heptulosonate 7-phosphate synthetase		20
chr01	74972469	TSC	T	G		164	20	90	39	2.90725e-05	0.00118	PGSC0003DMG400012549	82060350..82064340	2-dehydro-3-deoxyphosphoheptonate aldolase/ 3-deoxy-d-arabino-heptulosonate 7-phosphate synthetase		20
chr01	74972619	TSC	G	A		147	24	162	8	0.00467135	0.04717	PGSC0003DMG400012549	82060350..82064340	2-dehydro-3-deoxyphosphoheptonate aldolase/ 3-deoxy-d-arabino-heptulosonate 7-phosphate synthetase		20
chr01	74972765	TSC	A	G		23	105	0	76	1.29518e-05	0.00065	PGSC0003DMG400012549	82060350..82064340	2-dehydro-3-deoxyphosphoheptonate aldolase/ 3-deoxy-d-arabino-heptulosonate 7-phosphate synthetase		20
chr01	74972765	TY	A	G		2	91	22	122	0.000707359	0.01565	PGSC0003DMG400012549	82060350..82064340	2-dehydro-3-deoxyphosphoheptonate aldolase/ 3-deoxy-d-arabino-heptulosonate 7-phosphate synthetase		20
chr01	75036385	TSC	A	G		45	15	28	29	0.00447936	0.0458	PGSC0003DMG400012575	82124700..82133200	ABC4 (ABERRANT CHLOROPLAST DEVELOPMENT 4)		20
chr01	75036477	TSC	T	A		81	4	36	13	0.000654446	0.01164	PGSC0003DMG400012575	82124700..82133200	ABC4 (ABERRANT CHLOROPLAST DEVELOPMENT 4)		20
chr01	75036534	TSC	G	A		146	3	74	12	0.000520811	0.00988	PGSC0003DMG400012575	82124700..82133200	ABC4 (ABERRANT CHLOROPLAST DEVELOPMENT 4)		20
chr01	75036684	TY	T	C		55	10	69	45	0.000731813	0.01603	PGSC0003DMG400012575	82124700..82133200	ABC4 (ABERRANT CHLOROPLAST DEVELOPMENT 4)		20
chr01	75038378	TSC	T	C		103	13	79	29	0.00339653	0.03767	PGSC0003DMG400012575	82124700..82133200	ABC4 (ABERRANT CHLOROPLAST DEVELOPMENT 4)		20
chr01	75038378	TY	T	C		73	41	127	21	6.1425e-05	0.00279	PGSC0003DMG400012575	82124700..82133200	ABC4 (ABERRANT CHLOROPLAST DEVELOPMENT 4)		20
chr01	75038518	TSC	T	C		20	214	0	213	1.81796e-06	0.00015	PGSC0003DMG400012575	82124700..82133200	ABC4 (ABERRANT CHLOROPLAST DEVELOPMENT 4)		20
chr01	75038527	TY	T	A		155	46	229	21	2.72753e-05	0.00155	PGSC0003DMG400012575	82124700..82133200	ABC4 (ABERRANT CHLOROPLAST DEVELOPMENT 4)		20
chr01	75038580	TY	T	G		83	37	144	26	0.00225139	0.03471	PGSC0003DMG400012575	82124700..82133200	ABC4 (ABERRANT CHLOROPLAST DEVELOPMENT 4)		20
chr01	75098557	TSC	T	C		27	27	11	40	0.00415534	0.04342	PGSC0003DMG400012543	82184300..82190400	Glutamate/malate translocator		20
chr01	75098563	TSC	G	T		27	30	11	42	0.00475735	0.04779	PGSC0003DMG400012543	82184300..82190400	Glutamate/malate translocator		20
chr01	75098645	TY	T	C		71	96	144	102	0.00182767	0.03012	PGSC0003DMG400012543	82184300..82190400	Glutamate/malate translocator		20
chr01	75098766	TSC	A	C		99	130	46	143	5.52267e-05	0.00191	PGSC0003DMG400012543	82184300..82190400	Glutamate/malate translocator		20
chr01	75098766	TY	A	C		53	173	97	145	0.000156523	0.00544	PGSC0003DMG400012543	82184300..82190400	Glutamate/malate translocator		20
chr01	75098816	TSC	A	T		62	58	23	81	5.11745e-06	0.00032	PGSC0003DMG400012543	82184300..82190400	Glutamate/malate translocator		20
chr01	75098816	TY	A	T		29	102	55	67	0.000166296	0.00568	PGSC0003DMG400012543	82184300..82190400	Glutamate/malate translocator		20
chr01	75098821	TY	A	T		96	36	113	16	0.00310922	0.0432	PGSC0003DMG400012543	82184300..82190400	Glutamate/malate translocator		20
chr01	75119205	TSC	C	G	C/S	15	134	2	126	0.0043289	0.0447	PGSC0003DMG400036129	82208850..82210110	Conserved gene of unknown function	PGSC0003DMG400012571	20
chr01	75119205	TY	C	G	C/S	0	133	11	178	0.00334748	0.04538	PGSC0003DMG400036129	82208850..82210110	Conserved gene of unknown function	PGSC0003DMG400012571	20
chr01	75119228	TSC	C	T		132	13	107	30	0.00279692	0.03294	PGSC0003DMG400036129	82208850..82210110	Conserved gene of unknown function	PGSC0003DMG400012571	20
chr01	75119228	TY	C	T		96	29	170	17	0.000952722	0.01923	PGSC0003DMG400036129	82208850..82210110	Conserved gene of unknown function	PGSC0003DMG400012571	20
chr01	75119354	TY	T	G		129	57	192	27	7.58373e-06	0.0006	PGSC0003DMG400036129	82208850..82210110	Conserved gene of unknown function	PGSC0003DMG400012571	20
chr01	75119405	TSC	C	T		219	8	155	20	0.00263237	0.03159	PGSC0003DMG400036129	82208850..82210110	Conserved gene of unknown function	PGSC0003DMG400012571	20
chr01	75119440	TSC	C	T	A/T	114	8	67	17	0.00434151	0.04479	PGSC0003DMG400036129	82208850..82210110	Conserved gene of unknown function	PGSC0003DMG400012571	20
chr01	75126536	TY	C	A		27	16	78	6	8.70441e-05	0.00358	PGSC0003DMG400012541	82216000..82221300	Conserved gene of unknown function		20
chr01	75126539	TY	A	G		31	17	89	6	1.86271e-05	0.00117	PGSC0003DMG400012541	82216000..82221300	Conserved gene of unknown function		20
chr01	75126545	TY	G	A		37	18	100	7	3.78495e-05	0.00197	PGSC0003DMG400012541	82216000..82221300	Conserved gene of unknown function		20
chr01	75126570	TSC	G	A		20	110	1	94	0.000113792	0.00325	PGSC0003DMG400012541	82216000..82221300	Conserved gene of unknown function		20
chr01	75126619	TSC	A	G		151	31	152	5	2.7108e-05	0.00112	PGSC0003DMG400012541	82216000..82221300	Conserved gene of unknown function		20
chr01	75126619	TSY	A	G		115	3	136	55	4.09796e-10	0	PGSC0003DMG400012541	82216000..82221300	Conserved gene of unknown function		20
chr01	75126634	TSC	G	C		151	28	141	6	0.000813189	0.01362	PGSC0003DMG400012541	82216000..82221300	Conserved gene of unknown function		20
chr01	75126773	TSC	A	G	V/A	188	15	122	55	2.12003e-09	0	PGSC0003DMG400012541	82216000..82221300	Conserved gene of unknown function		20
chr01	75126773	TY	A	G	V/A	139	43	182	22	0.000985698	0.0197	PGSC0003DMG400012541	82216000..82221300	Conserved gene of unknown function		20
chr01	75126821	TSC	T	G		112	10	63	27	4.49043e-05	0.00164	PGSC0003DMG400012541	82216000..82221300	Conserved gene of unknown function		20
chr01	75126821	TY	T	G		80	26	121	11	0.000988814	0.01974	PGSC0003DMG400012541	82216000..82221300	Conserved gene of unknown function		20
chr01	75685018	TSC	C	T		42	20	11	48	5.79333e-08	1e-05	PGSC0003DMG401010673	82773700..82781900	Aldehyde dehydrogenase		20
chr01	75685018	TY	C	T		11	54	30	37	0.000666464	0.01502	PGSC0003DMG401010673	82773700..82781900	Aldehyde dehydrogenase		20
chr01	75685182	TSC	A	C		15	7	2	16	0.00036477	0.00764	PGSC0003DMG401010673	82773700..82781900	Aldehyde dehydrogenase		20
chr01	75686419	TY	C	T		5	25	45	19	1.47148e-06	0.00018	PGSC0003DMG401010673	82773700..82781900	Aldehyde dehydrogenase		20
chr01	75686442	TY	G	A		4	21	39	18	1.20393e-05	0.00085	PGSC0003DMG401010673	82773700..82781900	Aldehyde dehydrogenase		20
chr01	75686446	TSC	C	T		41	2	30	22	1.45374e-05	0.0007	PGSC0003DMG401010673	82773700..82781900	Aldehyde dehydrogenase		20
chr01	75686450	TY	G	A		5	21	36	18	9.67913e-05	0.00386	PGSC0003DMG401010673	82773700..82781900	Aldehyde dehydrogenase		20
chr01	75686592	TSC	A	G		7	40	0	56	0.00317417	0.03597	PGSC0003DMG401010673	82773700..82781900	Aldehyde dehydrogenase		20
chr01	75686699	TSC	C	T		35	56	5	76	4.33413e-07	5e-05	PGSC0003DMG401010673	82773700..82781900	Aldehyde dehydrogenase		20
chr01	75686699	TY	C	T		6	73	28	84	0.00193693	0.03131	PGSC0003DMG401010673	82773700..82781900	Aldehyde dehydrogenase		20
chr01	75688142	TSC	C	T		32	10	8	20	0.000160834	0.00419	PGSC0003DMG401010673	82773700..82781900	Aldehyde dehydrogenase		20
chr01	75688142	TY	C	T		9	25	27	13	0.000520226	0.01265	PGSC0003DMG401010673	82773700..82781900	Aldehyde dehydrogenase		20
chr01	75688304	TSC	A	T		222	28	159	60	9.23514e-06	0.0005	PGSC0003DMG401010673	82773700..82781900	Aldehyde dehydrogenase		20
chr01	75701977	TSC	A	C	Y/S	28	5	4	27	8.35334e-09	0	PGSC0003DMG400035168	82791430..82792650	Conserved gene of unknown function		20
chr01	75702033	TSC	T	C	C/R	10	18	20	3	0.000238009	0.00559	PGSC0003DMG400035168	82791430..82792650	Conserved gene of unknown function		20
chr01	75702108	TSC	T	C	F/L	10	33	0	33	0.00384304	0.0411	PGSC0003DMG400035168	82791430..82792650	Conserved gene of unknown function		20
chr01	75708616	TY	A	G		48	6	59	36	0.00054144	0.01302	PGSC0003DMG400010679	82798340..82799450	F-box protein family		20
chr01	75708656	TY	G	A	A/T	16	69	66	73	1.5179e-05	0.00101	PGSC0003DMG400010679	82798340..82799450	F-box protein family		20
chr01	75708656	TSY	G	A	A/T	16	74	52	69	0.000102815	0.00827	PGSC0003DMG400010679	82798340..82799450	F-box protein family		20
chr01	75708726	TSC	T	C	L/P	8	239	31	167	5.23284e-06	0.00033	PGSC0003DMG400010679	82798340..82799450	F-box protein family		20
chr01	75708780	TY	G	A	G/E	26	144	97	121	4.64299e-10	0	PGSC0003DMG400010679	82798340..82799450	F-box protein family		20
chr01	75708780	TSY	G	A	G/E	30	145	83	123	6.60913e-07	0.00026	PGSC0003DMG400010679	82798340..82799450	F-box protein family		20
chr01	75708845	TY	T	A	S/T	24	54	94	75	0.000343087	0.00947	PGSC0003DMG400010679	82798340..82799450	F-box protein family		20
chr01	75708876	TY	T	C	L/S	67	11	114	70	0.000120382	0.00451	PGSC0003DMG400010679	82798340..82799450	F-box protein family		20
chr01	75708876	TSY	T	C	L/S	60	11	105	65	0.000444169	0.02141	PGSC0003DMG400010679	82798340..82799450	F-box protein family		20
chr01	75771187	TSC	G	A		207	4	116	17	8.09599e-05	0.00253	PGSC0003DMG400010676	82857400..82866400	DNA binding protein		20
chr01	75771269	TY	G	C	V/L	141	83	188	27	3.00755e-09	0	PGSC0003DMG400010676	82857400..82866400	DNA binding protein		20
chr01	76415443	TSY	A	G	Q/R	159	10	179	45	5.40968e-05	0.00542	PGSC0003DMG400003102	83057390..83060820	L-galactose dehydrogenase	PGSC0003DMG400025741	21	5
chr01	76415446	TSC	G	C	G/A	176	20	140	44	0.00053215	0.01003	PGSC0003DMG400003102	83057390..83060820	L-galactose dehydrogenase	PGSC0003DMG400025741	21	5
chr01	76415447	TY	C	T		103	102	178	70	2.91727e-06	0.0003	PGSC0003DMG400003102	83057390..83060820	L-galactose dehydrogenase	PGSC0003DMG400025741	21	5
chr01	76415450	TSC	T	C		188	21	142	45	0.00023235	0.00549	PGSC0003DMG400003102	83057390..83060820	L-galactose dehydrogenase	PGSC0003DMG400025741	21	5
chr01	76058274	TSC	G	A		162	85	210	28	2.33676e-09	0	PGSC0003DMG400005123	83146650..83150340	Conserved gene of unknown function		21	5
chr01	76058274	TY	G	A		232	17	192	54	1.38465e-06	0.00017	PGSC0003DMG400005123	83146650..83150340	Conserved gene of unknown function		21	5
chr01	76058345	TY	C	T	E/K	113	107	168	62	2.66186e-06	0.00028	PGSC0003DMG400005123	83146650..83150340	Conserved gene of unknown function		21	5
chr01	76058378	TSC	G	C	Q/E	175	33	119	51	0.00119366	0.01793	PGSC0003DMG400005123	83146650..83150340	Conserved gene of unknown function		21	5
chr01	76058537	TY	A	C	L/V	36	17	71	8	0.00272512	0.03951	PGSC0003DMG400005123	83146650..83150340	Conserved gene of unknown function		21	5
chr01	76071370	TY	G	A		1	95	17	79	7.25101e-05	0.00314	PGSC0003DMG400005105	83158260..83161920	Squalene monooxygenase		21	5
chr01	76071370	TSY	G	A		0	76	16	61	1.2808e-05	0.00205	PGSC0003DMG400005105	83158260..83161920	Squalene monooxygenase		21	5
chr01	76071425	TSC	A	C		35	214	6	244	1.08324e-06	0.0001	PGSC0003DMG400005105	83158260..83161920	Squalene monooxygenase		21	5
chr01	76071425	TY	A	C		1	249	24	224	4.28662e-07	7e-05	PGSC0003DMG400005105	83158260..83161920	Squalene monooxygenase		21	5
chr01	76071425	TSY	A	C		8	201	31	215	0.000721652	0.02921	PGSC0003DMG400005105	83158260..83161920	Squalene monooxygenase		21	5
chr01	76094047	TY	A	C		10	24	36	21	0.00240626	0.03626	PGSC0003DMG400005107	83181180..83185940	Conserved gene of unknown function		21	5
chr01	76094110	TY	A	G		2	65	32	78	7.04286e-06	0.00057	PGSC0003DMG400005107	83181180..83185940	Conserved gene of unknown function		21	5
chr01	76094282	TY	C	T		0	142	31	145	5.1415e-09	0	PGSC0003DMG400005107	83181180..83185940	Conserved gene of unknown function		21	5
chr01	76094376	TSC	C	T		41	9	30	28	0.00111997	0.01712	PGSC0003DMG400005107	83181180..83185940	Conserved gene of unknown function		21	5
chr01	76147468	TY	A	G	D/G	0	91	32	135	4.29198e-07	7e-05	PGSC0003DMG400037874	83237002..83237361	PR1 protein, pathogenesis related protein 1		21	5
chr01	76147487	TY	T	C		4	98	93	86	9.16679e-19	0	PGSC0003DMG400037874	83237002..83237361	PR1 protein, pathogenesis related protein 1		21	5
chr01	76147487	TSY	T	C		11	66	78	80	8.33592e-08	6e-05	PGSC0003DMG400037874	83237002..83237361	PR1 protein, pathogenesis related protein 1		21	5
chr01	76300744	TY	G	A		71	33	120	18	0.000718947	0.01583	PGSC0003DMG401025733	83378700..83415200	PTOR, protein turn over rate (fitness)		21	5
chr01	76300796	TY	A	G		110	44	163	21	8.80438e-05	0.00361	PGSC0003DMG401025733	83378700..83415200	PTOR, protein turn over rate (fitness)		21	5
chr01	76300796	TSY	A	G		93	36	136	18	0.000744611	0.02975	PGSC0003DMG401025733	83378700..83415200	PTOR, protein turn over rate (fitness)		21	5
chr01	76300830	TSC	T	G		224	25	197	53	0.000794978	0.0134	PGSC0003DMG401025733	83378700..83415200	PTOR, protein turn over rate (fitness)		21	5
chr01	76300835	TY	C	A		177	67	211	36	0.000554909	0.01324	PGSC0003DMG401025733	83378700..83415200	PTOR, protein turn over rate (fitness)		21	5
chr01	76300842	TY	G	C		177	65	205	34	0.000686358	0.01533	PGSC0003DMG401025733	83378700..83415200	PTOR, protein turn over rate (fitness)		21	5
chr01	76316835	TSC	G	A		114	15	64	31	0.000187056	0.00468	PGSC0003DMG401025733	83378700..83415200	PTOR, protein turn over rate (fitness)		21	5
chr01	76316915	TSC	C	G		215	31	152	87	9.07657e-10	0	PGSC0003DMG401025733	83378700..83415200	PTOR, protein turn over rate (fitness)		21	5
chr01	76323095	TSC	G	T		200	49	144	81	8.4138e-05	0.0026	PGSC0003DMG401025733	83378700..83415200	PTOR, protein turn over rate (fitness)		21	5
chr01	76323095	TY	G	T		160	82	195	54	0.00336431	0.04553	PGSC0003DMG401025733	83378700..83415200	PTOR, protein turn over rate (fitness)		21	5
chr01	76323228	TSC	A	G		190	22	123	52	2.02058e-06	0.00016	PGSC0003DMG401025733	83378700..83415200	PTOR, protein turn over rate (fitness)		21	5
chr01	76323228	TY	A	G		121	51	188	36	0.00143342	0.02552	PGSC0003DMG401025733	83378700..83415200	PTOR, protein turn over rate (fitness)		21	5
chr01	76323259	TSC	G	T		158	27	99	44	0.000656083	0.01167	PGSC0003DMG401025733	83378700..83415200	PTOR, protein turn over rate (fitness)		21	5
chr01	76323259	TY	G	T		100	44	189	36	0.00117728	0.02227	PGSC0003DMG401025733	83378700..83415200	PTOR, protein turn over rate (fitness)		21	5
chr01	76415342	TSC	G	A		90	70	112	25	3.14827e-06	0.00022	PGSC0003DMG400025741	83504800..83505780	Adhesive/proline-rich protein		21	5
chr01	76415342	TY	G	A		145	19	117	57	3.70122e-06	0.00036	PGSC0003DMG400025741	83504800..83505780	Adhesive/proline-rich protein		21	5
chr01	76509747	TSC	G	T		173	39	78	60	5.17038e-07	6e-05	PGSC0003DMG400025745	83597450..83600410	Conserved gene of unknown function		21	5
chr01	76509747	TY	G	T		70	86	166	67	3.04029e-07	6e-05	PGSC0003DMG400025745	83597450..83600410	Conserved gene of unknown function		21	5
chr01	76509836	TY	C	T		37	46	105	33	3.05776e-06	0.00031	PGSC0003DMG400025745	83597450..83600410	Conserved gene of unknown function		21	5
chr01	76509836	TSY	C	T		41	33	90	25	0.00119107	0.04	PGSC0003DMG400025745	83597450..83600410	Conserved gene of unknown function		21	5
chr01	76510308	TSC	G	A		76	18	57	36	0.00369123	0.03996	PGSC0003DMG400025745	83597450..83600410	Conserved gene of unknown function		21	5
chr01	76510327	TSC	A	G	M/V	71	19	53	40	0.00163947	0.02255	PGSC0003DMG400025745	83597450..83600410	Conserved gene of unknown function		21	5
chr01	76510327	TY	A	G	M/V	28	36	77	29	0.000300077	0.00861	PGSC0003DMG400025745	83597450..83600410	Conserved gene of unknown function		21	5
chr01	76572296	TSC	A	G		49	98	8	105	1.57605e-07	2e-05	PGSC0003DMG400025845	83652800..83662100	Zinc finger protein-like 1		21	5
chr01	76572296	TY	A	G		8	92	50	114	1.24319e-05	0.00087	PGSC0003DMG400025845	83652800..83662100	Zinc finger protein-like 1		21	5
chr01	76572319	TY	T	A		161	64	217	31	1.81179e-05	0.00115	PGSC0003DMG400025845	83652800..83662100	Zinc finger protein-like 1		21	5
chr01	76572342	TY	C	T		150	61	213	32	3.8526e-05	0.002	PGSC0003DMG400025845	83652800..83662100	Zinc finger protein-like 1		21	5
chr01	76583867	TY	G	A		33	29	88	18	6.68903e-05	0.00297	PGSC0003DMG400034322	83673570..83674360	Zinc finger protein		21	5
chr01	76583882	TSC	T	G		64	34	29	46	0.000679939	0.01197	PGSC0003DMG400034322	83673570..83674360	Zinc finger protein		21	5
chr01	76583915	TSC	A	G		76	45	35	68	1.80799e-05	0.00083	PGSC0003DMG400034322	83673570..83674360	Zinc finger protein		21	5
chr01	76583915	TY	A	G		27	56	82	70	0.00171981	0.02889	PGSC0003DMG400034322	83673570..83674360	Zinc finger protein		21	5
chr01	76583968	TSC	C	G	P/R	131	108	54	138	3.42184e-08	1e-05	PGSC0003DMG400034322	83673570..83674360	Zinc finger protein		21	5
chr01	76584011	TSC	C	T		132	62	53	94	4.73454e-09	0	PGSC0003DMG400034322	83673570..83674360	Zinc finger protein		21	5
chr01	76584011	TY	C	T		46	76	131	89	0.00012105	0.00452	PGSC0003DMG400034322	83673570..83674360	Zinc finger protein		21	5
chr01	76804068	TY	A	G	T/A	54	76	60	171	0.00310267	0.04314	PGSC0003DMG400025760	83891300..83895930	Homeobox protein HAT3.1		21	5
chr01	76804091	TSY	G	A		103	3	155	31	0.000221342	0.01359	PGSC0003DMG400025760	83891300..83895930	Homeobox protein HAT3.1		21	5
chr01	76804110	TSC	G	A	G/R	239	11	205	43	2.49061e-06	0.00018	PGSC0003DMG400025760	83891300..83895930	Homeobox protein HAT3.1		21	5
chr01	76804110	TY	G	A	G/R	235	15	213	37	0.00185698	0.03045	PGSC0003DMG400025760	83891300..83895930	Homeobox protein HAT3.1		21	5
chr01	76804110	TSY	G	A	G/R	209	9	216	34	0.000353206	0.01846	PGSC0003DMG400025760	83891300..83895930	Homeobox protein HAT3.1		21	5
chr01	76804218	TSC	C	T	H/Y	115	55	158	31	0.000496837	0.00956	PGSC0003DMG400025760	83891300..83895930	Homeobox protein HAT3.1		21	5
chr01	76804256	TSC	C	T		158	25	138	53	0.000893319	0.01458	PGSC0003DMG400025760	83891300..83895930	Homeobox protein HAT3.1		21	5
chr01	76804256	TY	C	T		129	49	203	31	0.000392237	0.01039	PGSC0003DMG400025760	83891300..83895930	Homeobox protein HAT3.1		21	5
chr01	76805430	TY	A	G		90	32	65	90	1.26698e-07	3e-05	PGSC0003DMG400025760	83891300..83895930	Homeobox protein HAT3.1		21	5
chr01	76805430	TSY	A	G		62	33	55	75	0.000743957	0.02975	PGSC0003DMG400025760	83891300..83895930	Homeobox protein HAT3.1		21	5
chr01	76805444	TSC	A	C	D/A	192	54	138	88	8.30104e-05	0.00257	PGSC0003DMG400025760	83891300..83895930	Homeobox protein HAT3.1		21	5
chr01	76805445	TSC	T	G	D/E	238	12	188	35	8.81356e-05	0.00269	PGSC0003DMG400025760	83891300..83895930	Homeobox protein HAT3.1		21	5
chr01	76805557	TSC	C	T		189	61	105	116	4.15833e-10	0	PGSC0003DMG400025760	83891300..83895930	Homeobox protein HAT3.1		21	5
chr01	76805558	TSC	T	C	L/P	174	76	105	116	1.49512e-06	0.00013	PGSC0003DMG400025760	83891300..83895930	Homeobox protein HAT3.1		21	5
chr01	76805577	TSC	T	C		182	65	116	132	1.05575e-09	0	PGSC0003DMG400025760	83891300..83895930	Homeobox protein HAT3.1		21	5
chr01	76805584	TSC	C	A	R/S	171	76	196	43	0.00108331	0.01672	PGSC0003DMG400025760	83891300..83895930	Homeobox protein HAT3.1		21	5
chr01	76805584	TSY	C	A	R/S	164	63	211	35	0.000397107	0.01994	PGSC0003DMG400025760	83891300..83895930	Homeobox protein HAT3.1		21	5
chr01	76805616	TSC	G	A		131	21	124	4	0.0015016	0.02115	PGSC0003DMG400025760	83891300..83895930	Homeobox protein HAT3.1		21	5
chr01	76805673	TSC	A	T		84	13	59	28	0.00257312	0.03108	PGSC0003DMG400025760	83891300..83895930	Homeobox protein HAT3.1		21	5
chr01	76873799	TSY	C	A		34	20	88	13	0.000819391	0.0316	PGSC0003DMG400025861	83960780..83965430	Methylthioribose kinase		21	5
chr01	76873835	TY	T	G		85	40	183	32	0.000307293	0.00875	PGSC0003DMG400025861	83960780..83965430	Methylthioribose kinase		21	5
chr01	76873835	TSY	T	G		70	36	160	25	7.80067e-05	0.00685	PGSC0003DMG400025861	83960780..83965430	Methylthioribose kinase		21	5
chr01	76873890	TY	A	T		180	66	212	37	0.00126443	0.02338	PGSC0003DMG400025861	83960780..83965430	Methylthioribose kinase		21	5
chr01	76873890	TSY	A	T		161	62	215	31	4.35965e-05	0.00466	PGSC0003DMG400025861	83960780..83965430	Methylthioribose kinase		21	5
chr01	76873914	TY	G	A		149	79	202	25	1.69826e-09	0	PGSC0003DMG400025861	83960780..83965430	Methylthioribose kinase		21	5
chr01	76873914	TSY	G	A		132	49	196	29	0.000368194	0.01899	PGSC0003DMG400025861	83960780..83965430	Methylthioribose kinase		21	5
chr01	76873920	TY	A	T		159	58	190	33	0.00219109	0.03409	PGSC0003DMG400025861	83960780..83965430	Methylthioribose kinase		21	5
chr01	76873920	TSY	A	T		121	49	200	22	2.40485e-06	0.00065	PGSC0003DMG400025861	83960780..83965430	Methylthioribose kinase		21	5
chr01	76873956	TY	C	T		61	73	131	64	0.000107128	0.00414	PGSC0003DMG400025861	83960780..83965430	Methylthioribose kinase		21	5
chr01	76873963	TY	G	A		44	86	121	82	6.20003e-06	0.00052	PGSC0003DMG400025861	83960780..83965430	Methylthioribose kinase		21	5
chr01	76873975	TY	C	T		62	74	146	63	1.00446e-05	0.00074	PGSC0003DMG400025861	83960780..83965430	Methylthioribose kinase		21	5
chr01	76874010	TSC	G	A		91	92	34	119	1.71158e-07	2e-05	PGSC0003DMG400025861	83960780..83965430	Methylthioribose kinase		21	5
chr01	76874010	TY	G	A		19	123	65	158	0.000525317	0.01274	PGSC0003DMG400025861	83960780..83965430	Methylthioribose kinase		21	5
chr01	76874019	TSC	G	A		90	109	28	136	1.22065e-08	0	PGSC0003DMG400025861	83960780..83965430	Methylthioribose kinase		21	5
chr01	76874030	TSC	A	G		114	47	109	19	0.00462936	0.04689	PGSC0003DMG400025861	83960780..83965430	Methylthioribose kinase		21	5
chr01	76946497	TY	T	C		58	55	65	20	0.000362209	0.00983	PGSC0003DMG400025768	84036200..84039360	PRKR interacting protein 1		21	5
chr01	76946657	TY	C	A		127	73	206	39	1.05216e-06	0.00014	PGSC0003DMG400025768	84036200..84039360	PRKR interacting protein 1		21	5
chr01	76946837	TY	C	T	P/S	90	11	104	47	0.000206664	0.00663	PGSC0003DMG400025768	84036200..84039360	PRKR interacting protein 1		21	5
chr01	76947030	TY	A	G		111	97	196	50	3.68187e-09	0	PGSC0003DMG400025768	84036200..84039360	PRKR interacting protein 1		21	5
chr01	76947030	TSY	A	G		87	73	188	60	8.55014e-06	0.00156	PGSC0003DMG400025768	84036200..84039360	PRKR interacting protein 1		21	5
chr01	76947092	TY	A	G		57	55	106	31	1.60731e-05	0.00105	PGSC0003DMG400025768	84036200..84039360	PRKR interacting protein 1		21	5
chr01	76947092	TSY	A	G		41	42	91	32	0.000380776	0.0194	PGSC0003DMG400025768	84036200..84039360	PRKR interacting protein 1		21	5
chr01	76999085	TY	A	T		56	39	120	24	4.29409e-05	0.00216	PGSC0003DMG400025772	84085100..84092000	Tip120, TATA binding protein-interacting protein		21	5
chr01	76999086	TSC	T	G		69	31	35	58	1.41208e-05	0.00069	PGSC0003DMG400025772	84085100..84092000	Tip120, TATA binding protein-interacting protein		21	5
chr01	76999177	TSC	G	T		177	56	182	24	0.000801349	0.01348	PGSC0003DMG400025772	84085100..84092000	Tip120, TATA binding protein-interacting protein		21	5
chr01	76999210	TSC	G	C		142	51	86	90	1.24798e-06	0.00011	PGSC0003DMG400025772	84085100..84092000	Tip120, TATA binding protein-interacting protein		21	5
chr01	76999213	TY	C	T		25	156	76	146	1.91068e-06	0.00022	PGSC0003DMG400025772	84085100..84092000	Tip120, TATA binding protein-interacting protein		21	5
chr01	76999213	TSY	C	T		22	132	75	146	1.46474e-05	0.00224	PGSC0003DMG400025772	84085100..84092000	Tip120, TATA binding protein-interacting protein		21	5
chr01	76999217	TSY	G	T		33	17	91	5	9.60204e-06	0.00169	PGSC0003DMG400025772	84085100..84092000	Tip120, TATA binding protein-interacting protein		21	5
chr01	76999256	TSC	C	G		141	27	95	46	0.000756008	0.01292	PGSC0003DMG400025772	84085100..84092000	Tip120, TATA binding protein-interacting protein		21	5
chr01	76999256	TY	C	G		98	51	166	28	2.82652e-05	0.00159	PGSC0003DMG400025772	84085100..84092000	Tip120, TATA binding protein-interacting protein		21	5
chr01	76999256	TSY	C	G		87	35	137	18	0.000388967	0.01968	PGSC0003DMG400025772	84085100..84092000	Tip120, TATA binding protein-interacting protein		21	5
chr01	76999297	TSC	T	C		166	71	88	103	6.63371e-07	7e-05	PGSC0003DMG400025772	84085100..84092000	Tip120, TATA binding protein-interacting protein		21	5
chr01	76999309	TSC	T	A		157	79	85	103	1.31472e-05	0.00065	PGSC0003DMG400025772	84085100..84092000	Tip120, TATA binding protein-interacting protein		21	5
chr01	76999320	TSC	G	A		140	36	99	56	0.00203048	0.02629	PGSC0003DMG400025772	84085100..84092000	Tip120, TATA binding protein-interacting protein		21	5
chr01	76999320	TY	G	A		94	61	162	40	5.49177e-05	0.00258	PGSC0003DMG400025772	84085100..84092000	Tip120, TATA binding protein-interacting protein		21	5
chr01	76999320	TSY	G	A		79	47	147	28	4.19416e-05	0.00455	PGSC0003DMG400025772	84085100..84092000	Tip120, TATA binding protein-interacting protein		21	5
chr01	76999322	TSC	G	A		127	30	96	50	0.00396155	0.04198	PGSC0003DMG400025772	84085100..84092000	Tip120, TATA binding protein-interacting protein		21	5
chr01	76999322	TY	G	A		89	53	148	37	0.000702418	0.01557	PGSC0003DMG400025772	84085100..84092000	Tip120, TATA binding protein-interacting protein		21	5
[truncated: 20,739 more rows]
